# Supplementary material for: Dual emission from an iridium(iii) complex/counter anion ion pair
Source: Royal Society of Chemistry journal article supplement (doi:10.1039/d1dt00021g), 2021-01-01
Supplement: d1dt00021g1.pdf [file d1dt00021g1.pdf]

Supplementary Information

Dual emission from an iridium(III) complex/counter anion ion pair

Wataru Ito, Shingo Hattori, Mio Kondo, Hiroki Sakagami, Osamu Kobayashi,  
Takayoshi Ishimoto, and Kazuteru Shinozaki\*

Department of Materials Science, Graduate School of Nanobioscience, Yokohama City  
University, 22-2 Seto, Kanazawa-ku, Yokohama 236-0027 JAPAN

| Peak | $\nu$ (F1) [ppm] |
|------|------------------|
| 1    | 8.8872           |
| 2    | 8.8834           |
| 3    | 8.8647           |
| 4    | 8.8165           |
| 5    | 8.799            |
| 6    | 8.7934           |
| 7    | 8.7759           |
| 8    | 8.6115           |
| 9    | 8.61             |
| 10   | 8.5912           |
| 11   | 8.5897           |
| 12   | 8.2506           |
| 13   | 8.2471           |
| 14   | 8.2308           |
| 15   | 8.2272           |
| 16   | 8.2109           |
| 17   | 8.2073           |
| 18   | 7.5978           |
| 19   | 7.5957           |
| 20   | 7.5837           |
| 21   | 7.5816           |
| 22   | 7.5158           |
| 23   | 7.5125           |
| 24   | 7.5015           |
| 25   | 7.4967           |
| 26   | 7.493            |
| 27   | 7.4821           |
| 28   | 7.4788           |

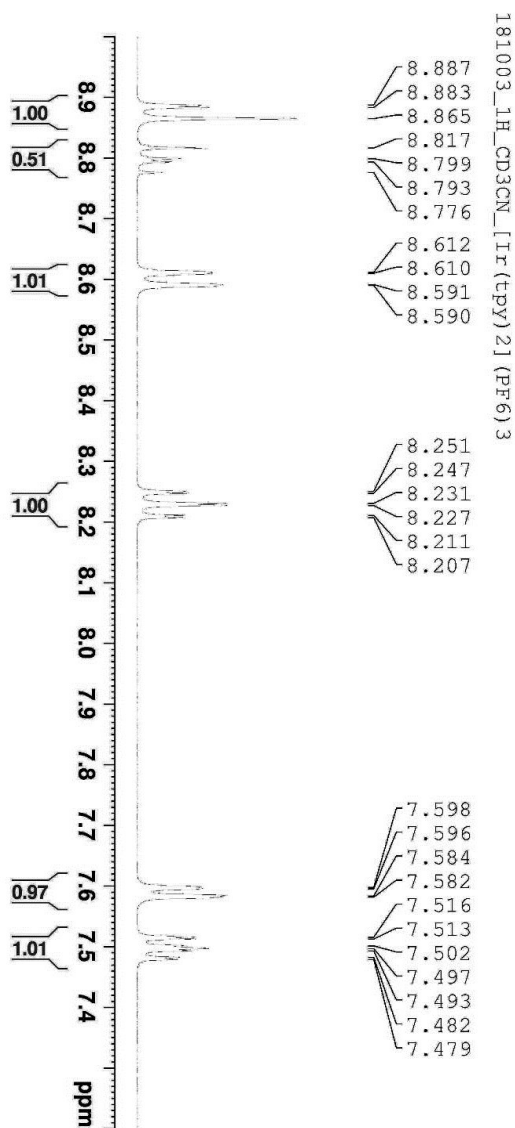

Figure S1.  $^1\text{H}$  NMR of  
 $[\text{Ir}(\text{tpy})_2](\text{PF}_6)_3$  in  $\text{CD}_3\text{CN}$

$^1\text{H}$  NMR(400 MHz, Acetonitrile- $d_3$ );

$\delta$ 8.8784 (*d*, 4H,  $J$  = 8.24 Hz), 8.7962 (*t*, 2H,  $J$ =8.12 Hz) 8.6006 (*d*, 4H,  $J$ =8.12 Hz), 8.2290 (*t*, 4H,  $J$ =7.95. Hz), 7.5897 (*d*, 4H,  $J$ =5.64 Hz), 7.4972 (*t*, 4H,  $J$ =6.74 Hz)

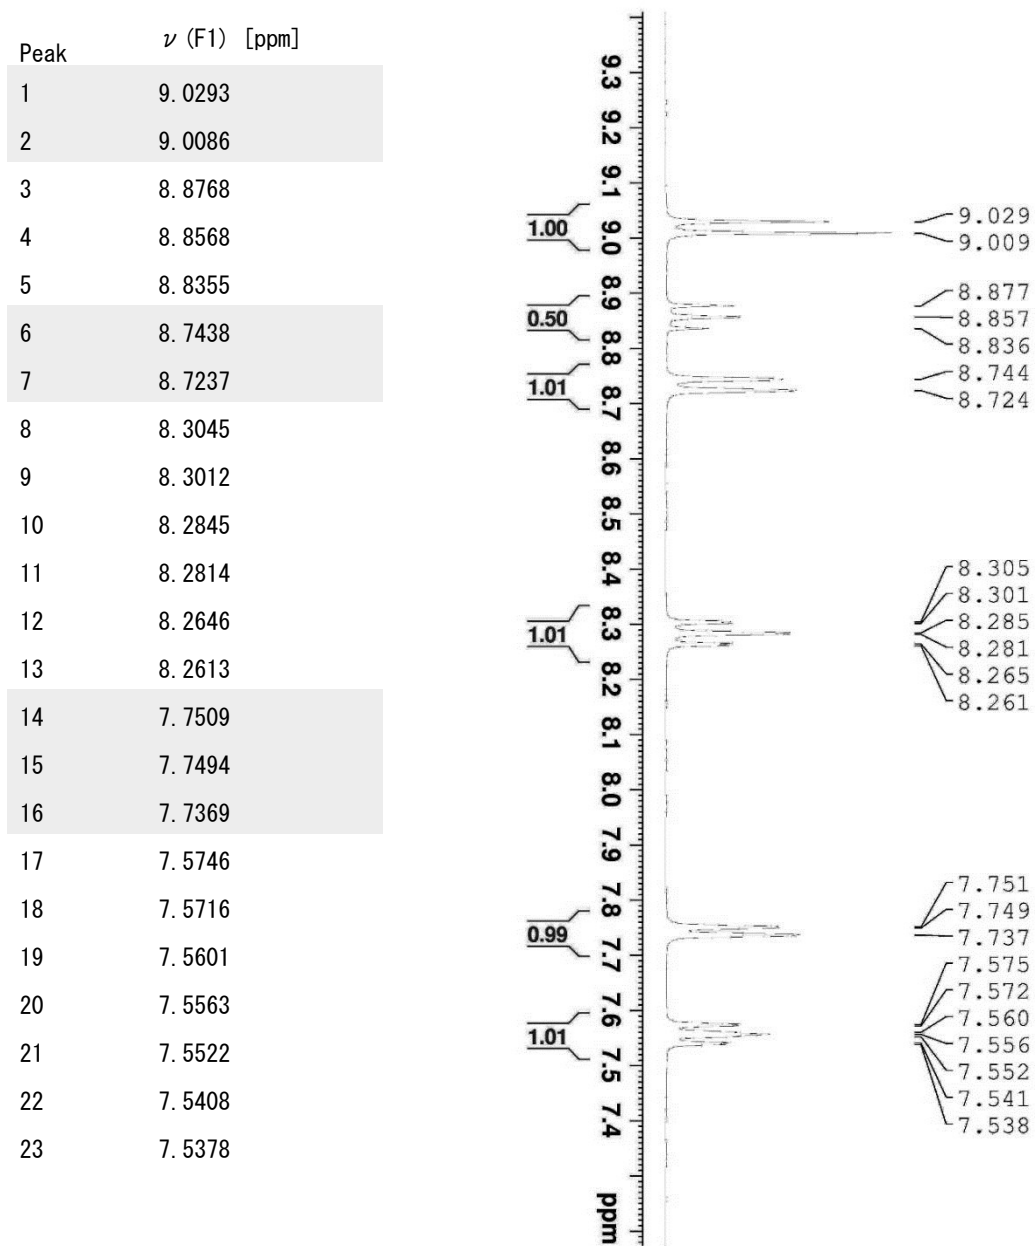

Figure S2.  $^1\text{H}$  NMR of  $[\text{Ir}(\text{tpy})_2]\text{Cl}_3$  in  $\text{D}_2\text{O}$

$^1\text{H}$  NMR(400 MHz,  $\text{D}_2\text{O}$ );  $\delta$ 9.0190 (*d*, 4H,  $J = 8.28$  Hz), 8.8564 (*t*, 2H,  $J = 8.26$  Hz)  
 8.7338 (*d*, 4H,  $J = 8.04$  Hz), 8.2829 (*t*, 4H,  $J = 7.98$  Hz), 7.7457 (*d*, 4H,  $J = 5.30$  Hz),  
 7.5562 (*t*, 4H,  $J = 6.76$  Hz)

| Peak | $\nu$ (F1) [ppm] |
|------|------------------|
| 1    | 9.0107           |
| 2    | 8.9901           |
| 3    | 8.8625           |
| 4    | 8.8428           |
| 5    | 8.8211           |
| 6    | 8.725            |
| 7    | 8.7059           |
| 8    | 8.292            |
| 9    | 8.2884           |
| 10   | 8.272            |
| 11   | 8.2686           |
| 12   | 8.2521           |
| 13   | 8.2485           |
| 14   | 7.726            |
| 15   | 7.7137           |
| 16   | 7.5579           |
| 17   | 7.5546           |
| 18   | 7.5435           |
| 19   | 7.5389           |
| 20   | 7.5353           |
| 21   | 7.5242           |
| 22   | 7.521            |

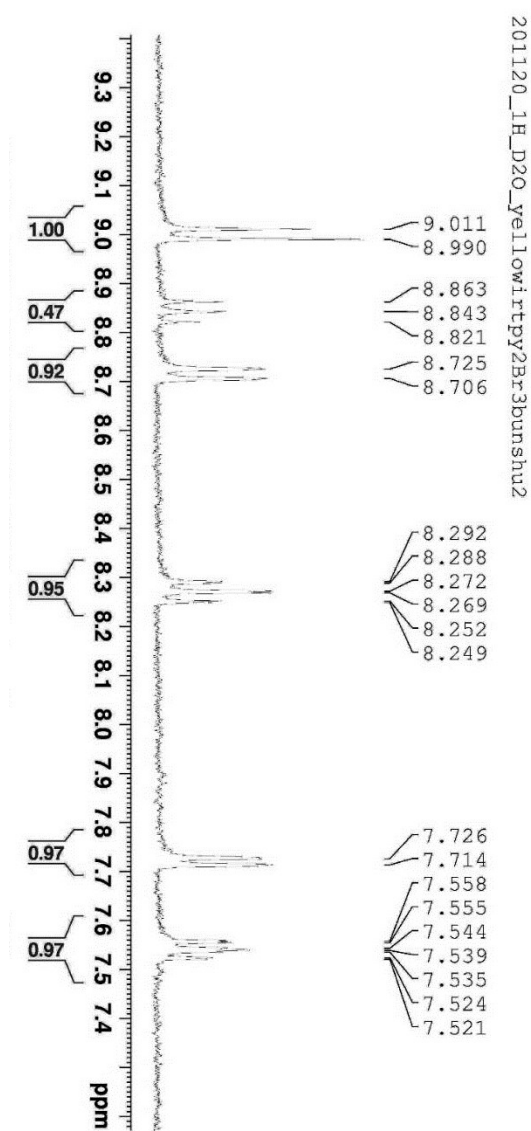

Figure S3.  $^1\text{H}$  NMR of  $[\text{Ir}(\text{tpy})_2]\text{Br}_3$  in  $\text{D}_2\text{O}$

$^1\text{H}$  NMR(400 MHz,  $\text{D}_2\text{O}$ );  $\delta$ 9.0004 (*d*, 4H,  $J = 8.24$  Hz), 8.8421 (*t*, 2H,  $J = 8.28$  Hz), 8.7155 (*d*, 4H,  $J = 7.64$  Hz), 8.2703 (*t*, 4H,  $J = 7.98$  Hz), 7.7199 (*d*, 4H,  $J = 4.92$ Hz), 7.5393 (*t*, 4H,  $J = 6.73$  Hz)

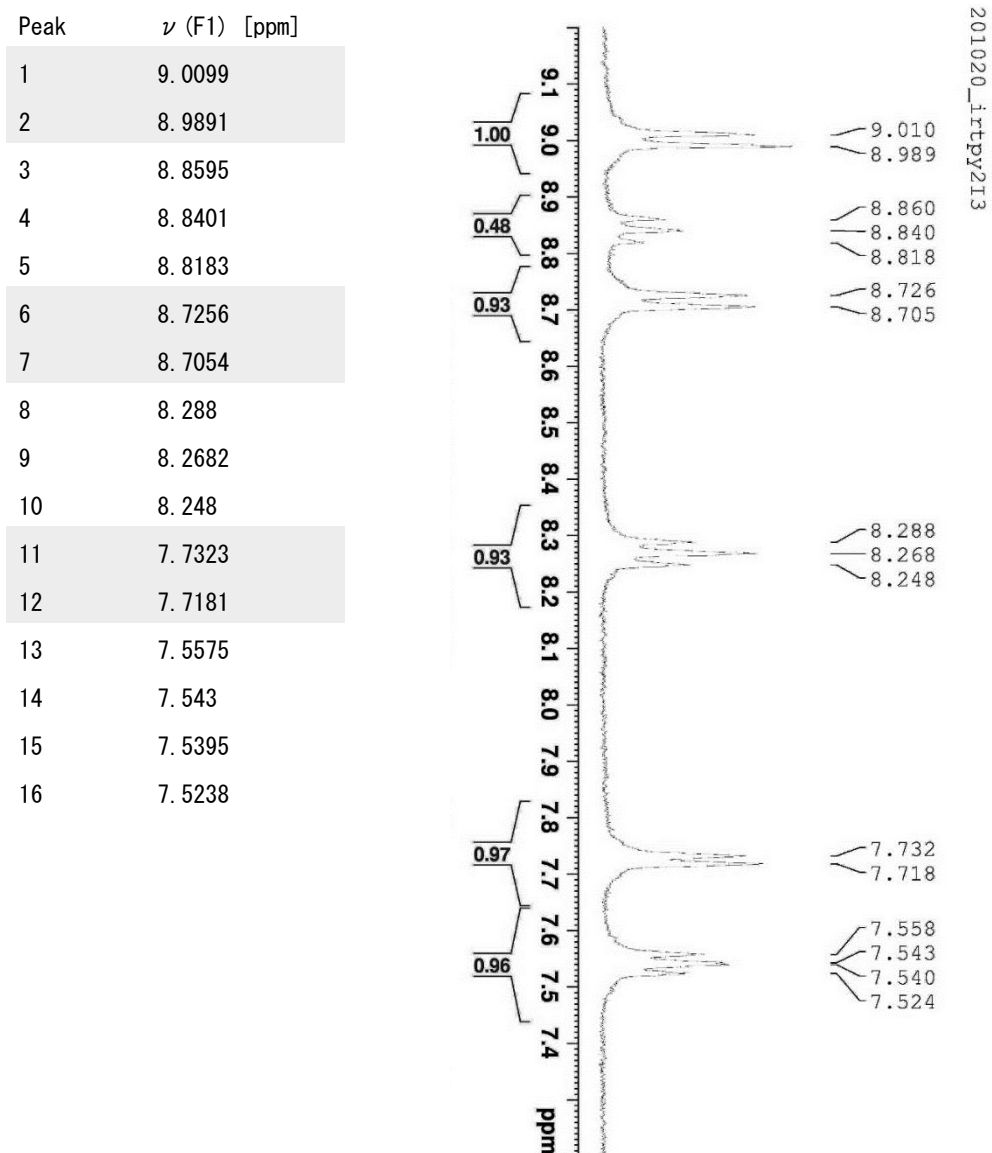

Figure S4.  $^1\text{H}$  NMR of  $[\text{Ir}(\text{tpy})_2]\text{I}_3$  in  $\text{D}_2\text{O}$

$^1\text{H}$  NMR(400 MHz,  $\text{D}_2\text{O}$ );  $\delta$ 8.9995 (*d*, 4H,  $J = 8.32$  Hz), 8.8393 (*t*, 2H,  $J = 8.24$  Hz)  
 8.7155 (*d*, 4H,  $J = 8.08$  Hz), 8.2681 (*t*, 4H,  $J = 8.00$  Hz), 7.7252 (*d*, 4H,  $J = 5.68$  Hz),  
 7.5410 (*t*, 4H,  $J = 6.74$  Hz)

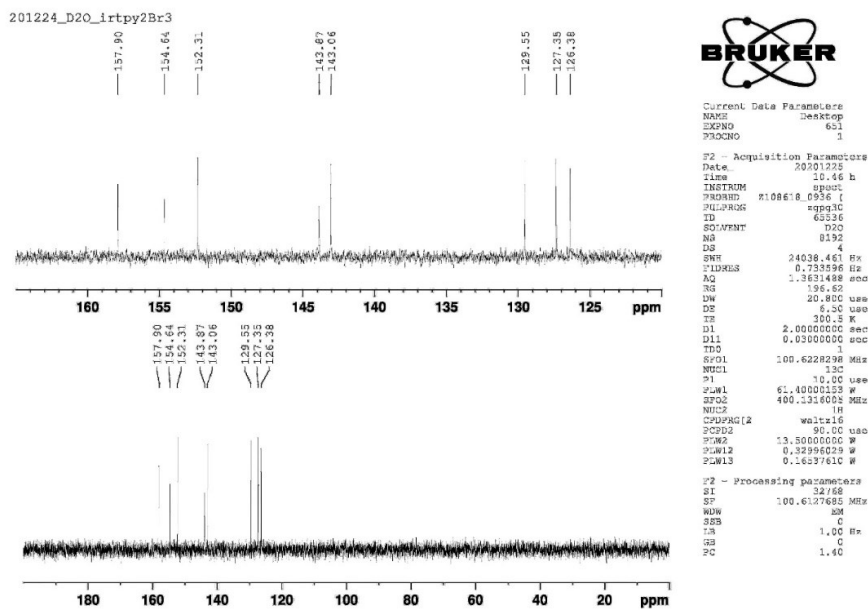

Figure S5.  $^{13}\text{C}$  NMR of  $[\text{Ir}(\text{tpy})_2]\text{Br}_3$  in  $\text{D}_2\text{O}$

$^{13}\text{C}$  NMR(400 MHz,  $\text{D}_2\text{O}$ );  $\delta$  157.9, 154.6, 152.3, 143.9, 143.1, 130.0, 127.4, 126.4

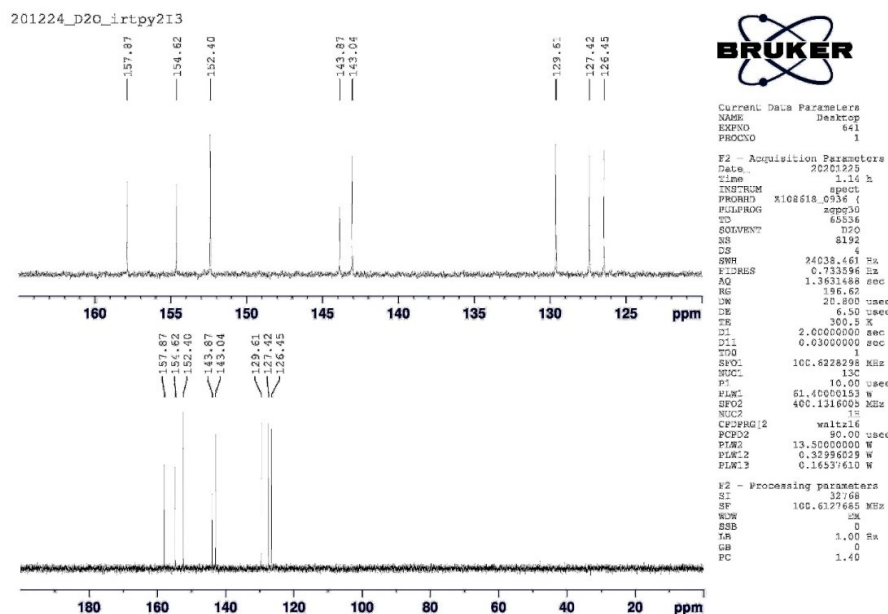

Figure S6.  $^{13}\text{C}$  NMR of  $[\text{Ir}(\text{tpy})_2]\text{I}_3$  in  $\text{D}_2\text{O}$

$^{13}\text{C}$  NMR(400 MHz,  $\text{D}_2\text{O}$ );  $\delta$  157.9, 154.6, 152.4, 143.9, 143.0, 129.6, 127.4, 126.5

The density functionals were evaluated by comparing the calculated and experimental absorption spectra. The TD-DFT calculation was performed at  $\omega$ B97X/Jorge-DZP-DKH, B3LYP/Jorge-DZP-DKH, and PBE0/Jorge-DZP-DKH levels with zeroth order regular approximation (ZORA) and conductor-like polarizable continuum model (CPCM) to predict absorption spectra at the structure optimized at  $\omega$ B97X/Jorge-DZP-DKH level, which are exhibited in Fig. S1. At  $\omega$ B97X/Jorge-DZP-DKH level, the predicted spectrum in 200 - 300 nm is in good agreement with the experimental spectrum, while the spectra predicted at B3LYP/Jorge-DZP-DKH and PBE0/Jorge-DZP-DKH levels are inconsistent with the experimental result and show long tails in the lowest absorption bands. So we adopted the  $\omega$ B97X/Jorge-DZP-DKH to the functional for DFT and TD-DFT calculations for  $[\text{Ir}(\text{tpy})_2]^{3+}$  complex.

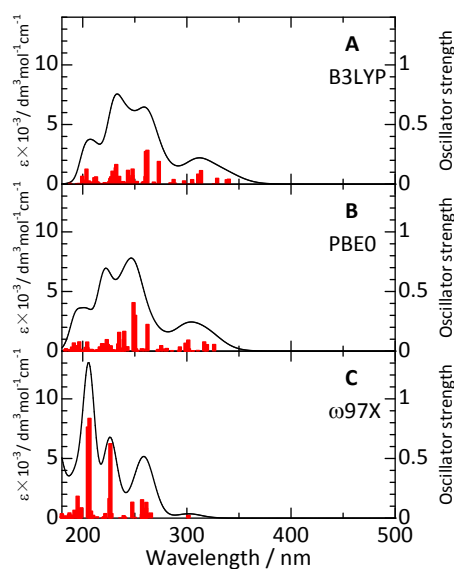

Figure S7. The absorption spectra predicted by TD-DFT calculation at the three density functionals of (a) B3LYP, (b) PBE0, and (c)  $\omega$ B97X. Each spectrum is constructed with superposition of Gaussian functions<sup>69</sup> produced from oscillator strength at excitation energy.

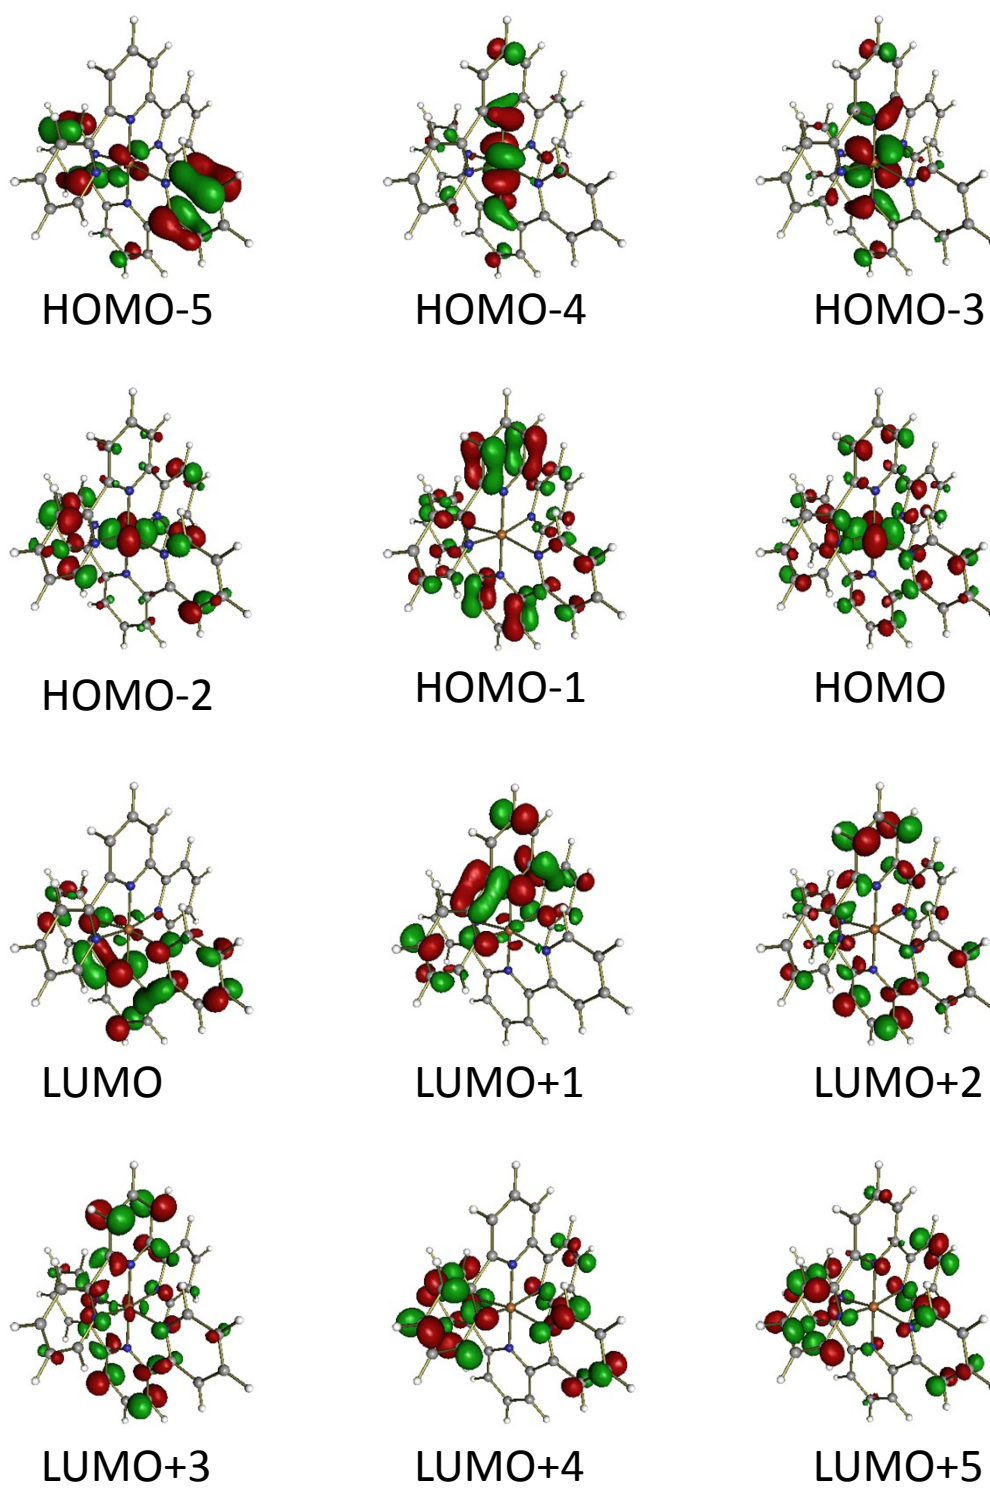

Figure S8. Molecular orbitals of  $[\text{Ir}(\text{tpy})_2]^{3+}$ .



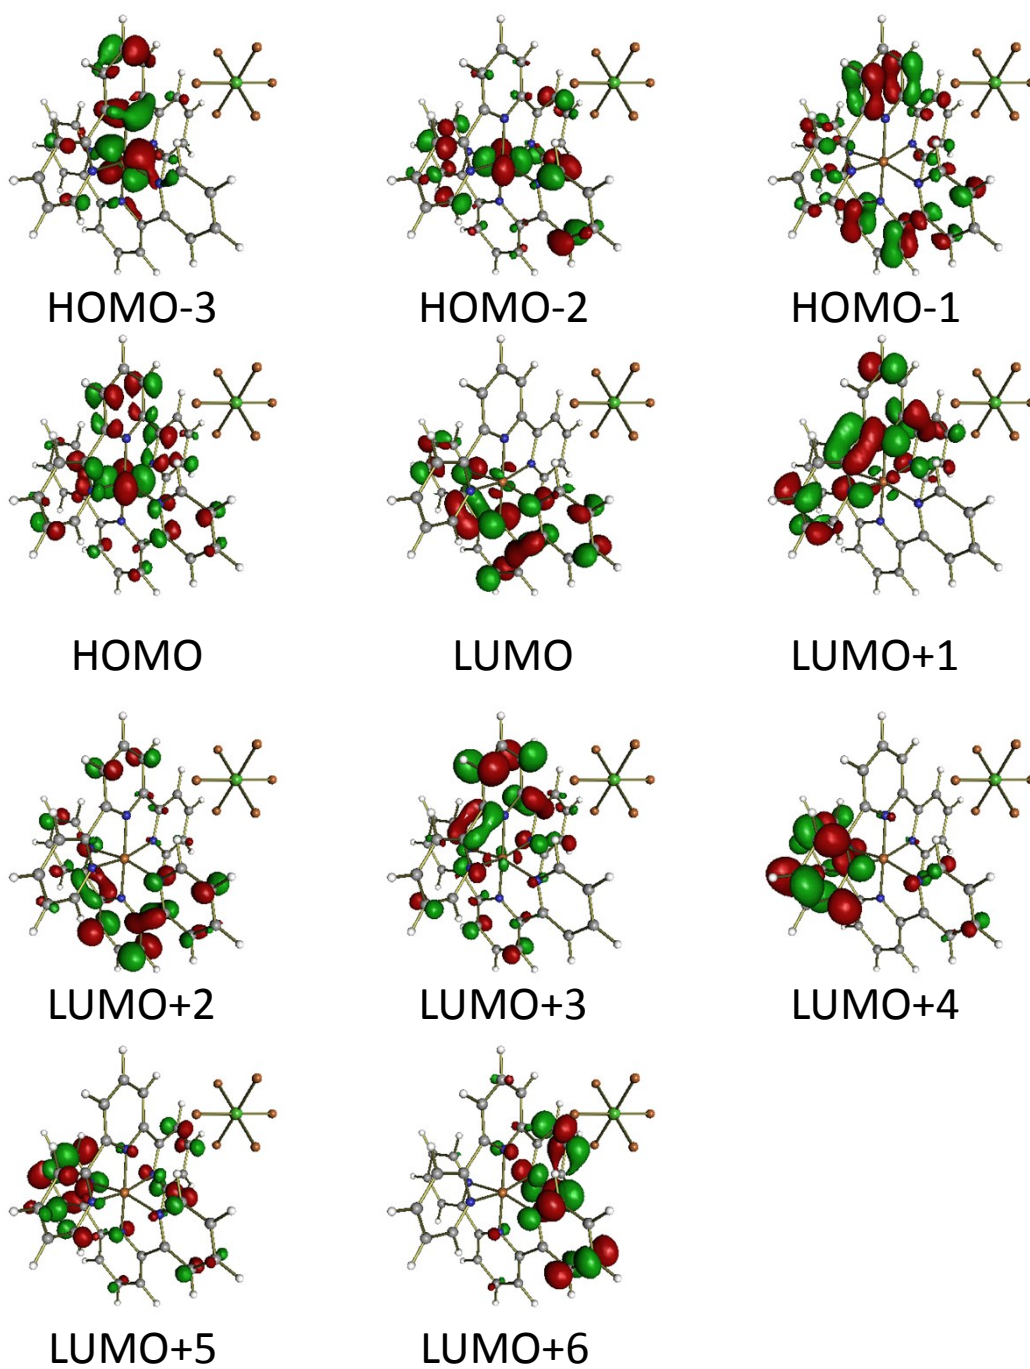

Figure S9. Molecular orbitals of  $[\text{Ir}(\text{tpy})_2]^{3+}\text{PF}_6^-$ .

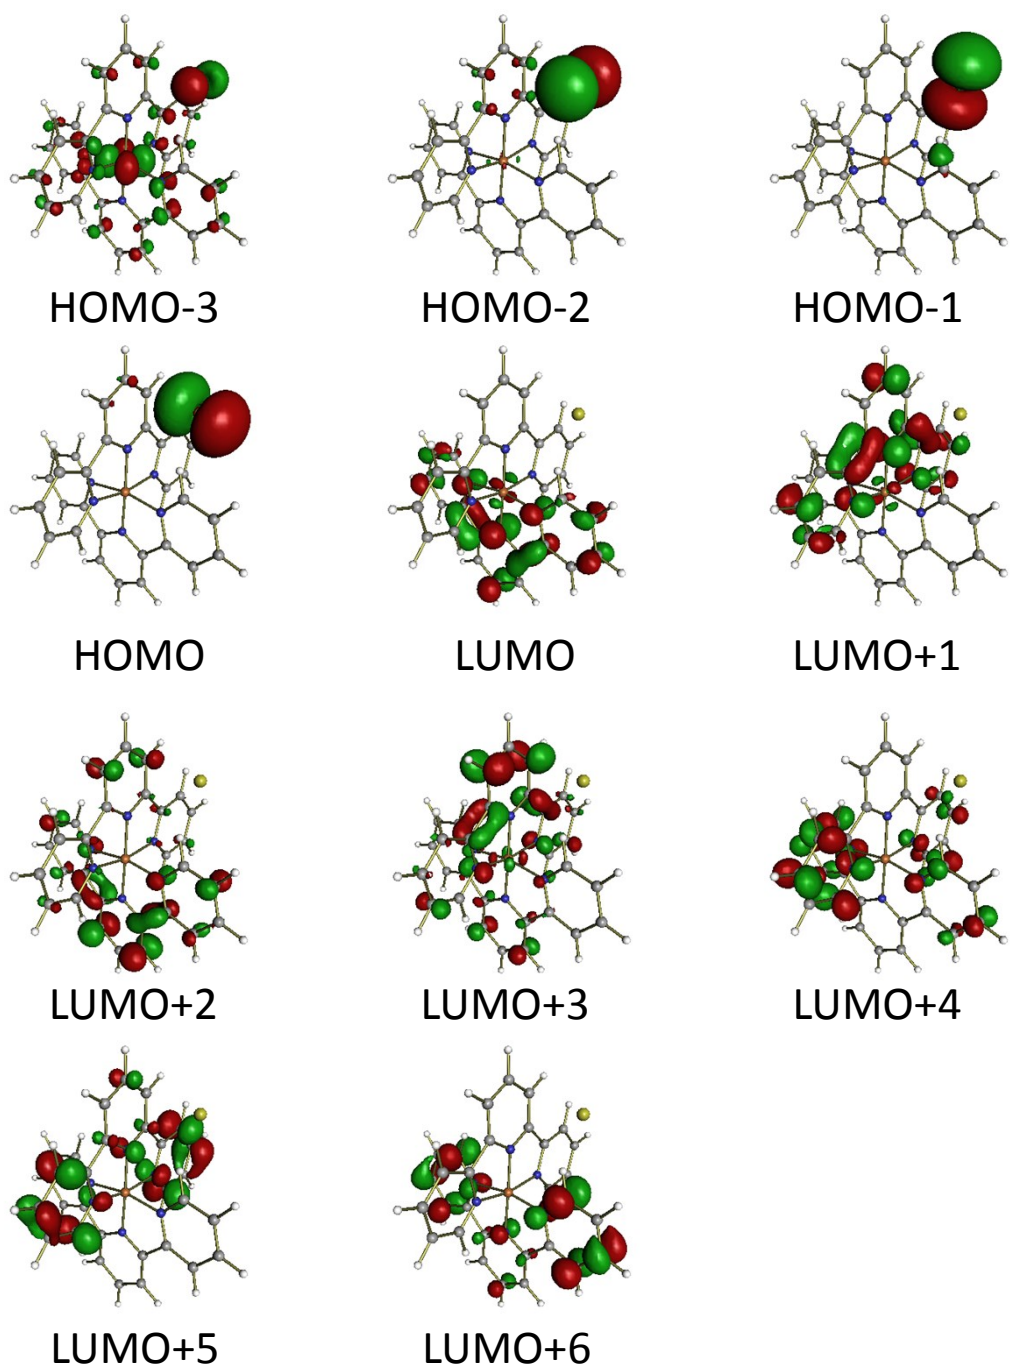

Figure S10. Molecular orbitals of  $[\text{Ir}(\text{tpy})_2]^{3+}\text{Cl}^-$ .

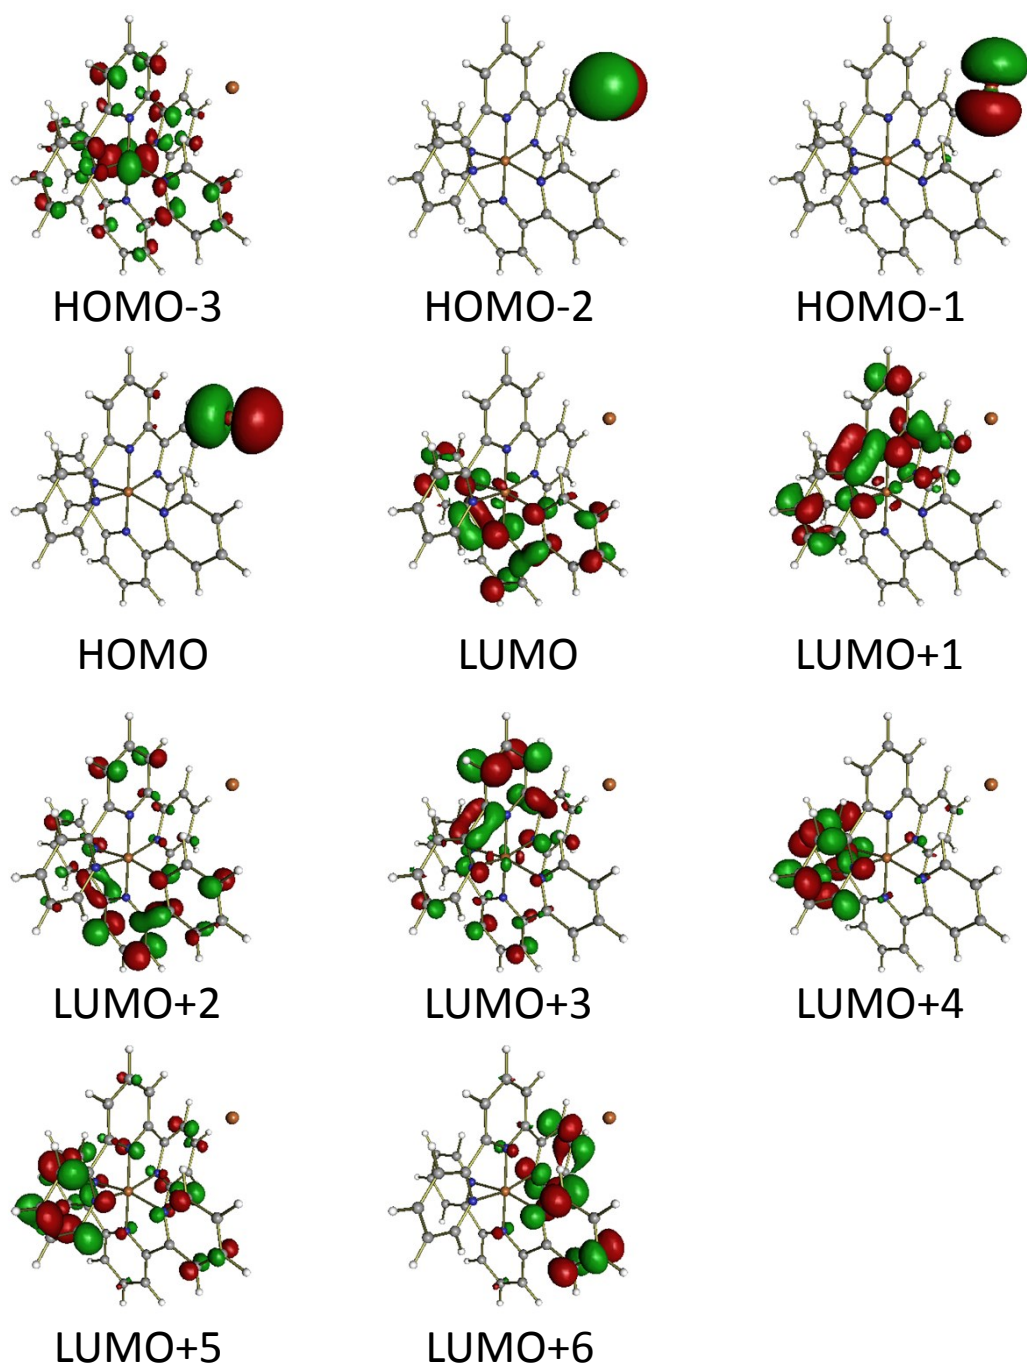

Figure S11. Molecular orbitals of  $[\text{Ir}(\text{tpy})_2]^{3+}\text{Br}^-$ .

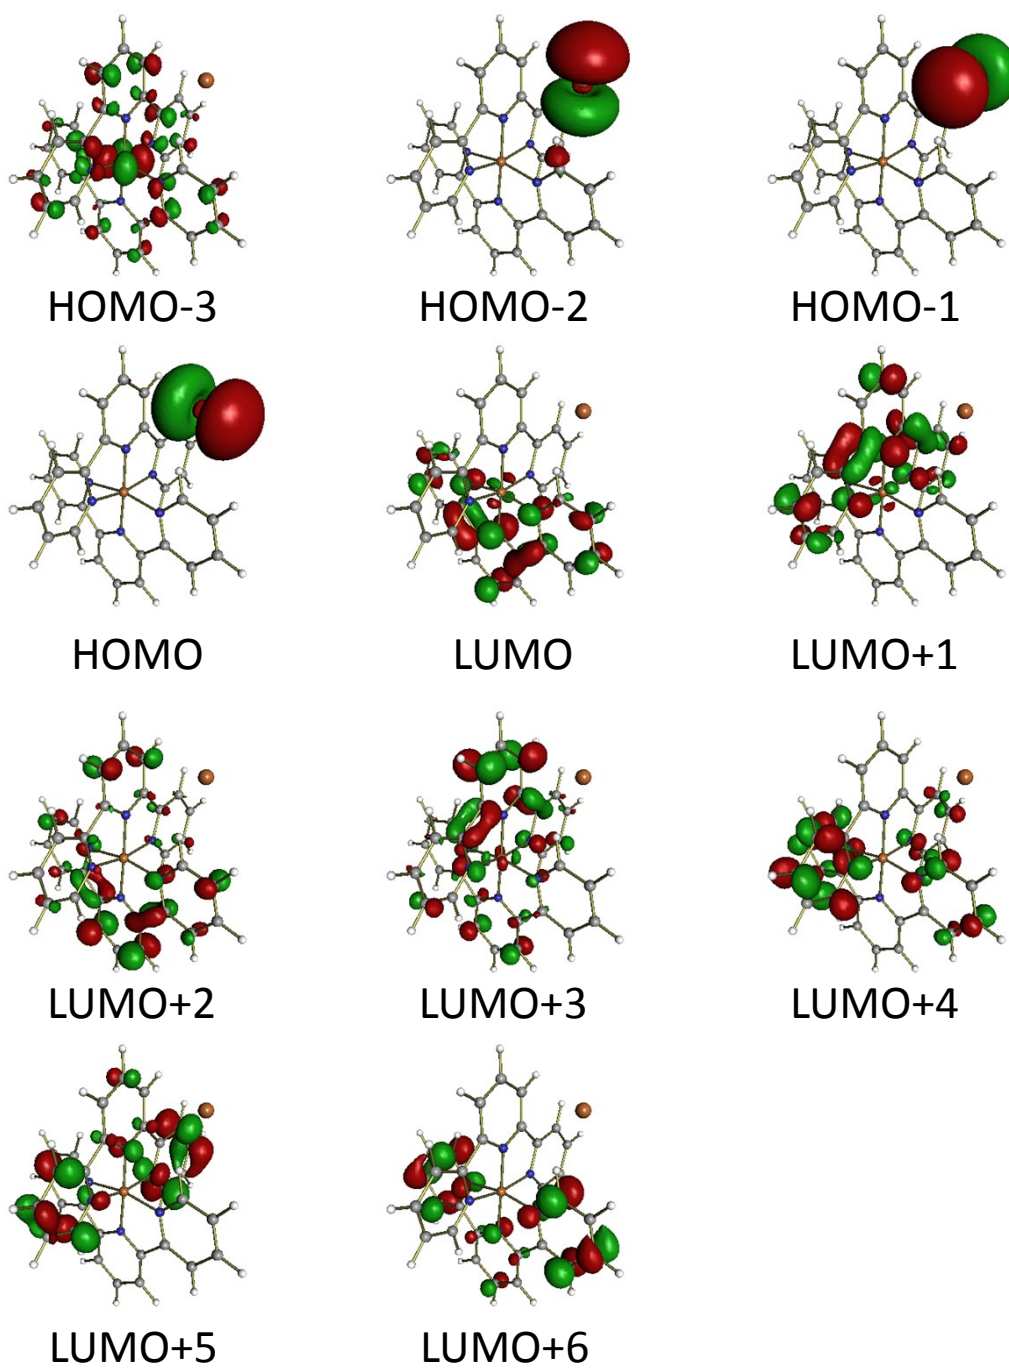

Figure S12. Molecular orbitals of  $[\text{Ir}(\text{tpy})_2]^{3+}\text{I}^-$ .

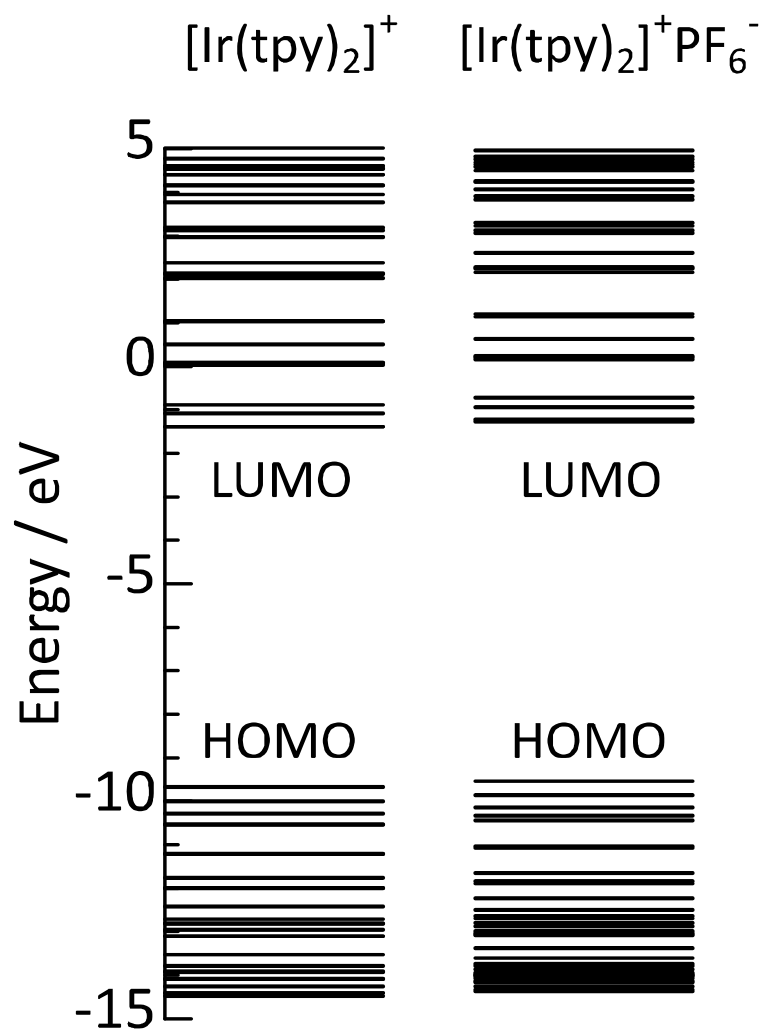

Figure S13. Molecular orbital energies of  $[\text{Ir}(\text{tpy})_2]^{3+}$  (Left) and  $[\text{Ir}(\text{tpy})_2]^{3+}\text{PF}_6^-$  (Right).

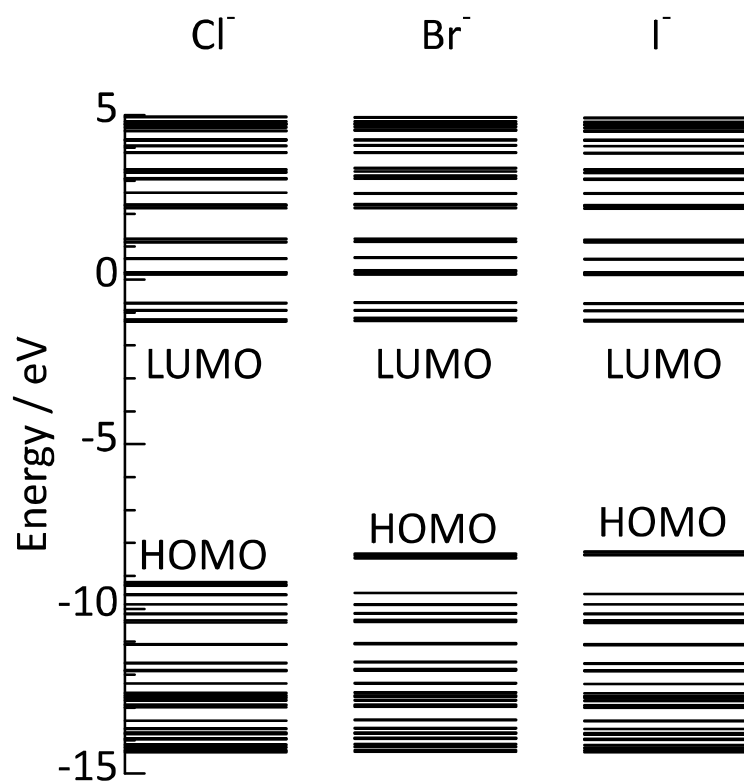

Figure S14. Molecular orbital energies of  $[\text{Ir}(\text{tpy})_2]^{3+}\text{Cl}^-$  (Left),  $[\text{Ir}(\text{tpy})_2]^{3+}\text{Br}^-$  (Middle) and  $[\text{Ir}(\text{tpy})_2]^{3+}\text{I}^-$  (Right).

Table S1 SOC states of  $[\text{Ir}(\text{tpy})_2]^{3+}$ 

| State | Wavelength | Composition                                                                                   | $f$                  |
|-------|------------|-----------------------------------------------------------------------------------------------|----------------------|
| 1     | 365.357 nm | 49%T <sub>1</sub> , 44%T <sub>2</sub> , 5%T <sub>4</sub>                                      | 1.7×10 <sup>-8</sup> |
| 2     | 365.245 nm | 54%T <sub>1</sub> , 45%T <sub>2</sub>                                                         | 3.2×10 <sup>-7</sup> |
| 3     | 365.105 nm | 67%T <sub>1</sub> , 15%T <sub>2</sub> , 18%T <sub>3</sub>                                     | 9.0×10 <sup>-7</sup> |
| 4     | 365.051 nm | 16%T <sub>1</sub> , 69%T <sub>2</sub> , 8%T <sub>3</sub> , 6%T <sub>4</sub>                   | 1.1×10 <sup>-6</sup> |
| 5     | 364.848 nm | 31%T <sub>1</sub> , 37%T <sub>2</sub> , 30%T <sub>3</sub>                                     | 3.4×10 <sup>-8</sup> |
| 6     | 364.559 nm | 46%T <sub>1</sub> , 51%T <sub>2</sub> , 1%T <sub>4</sub>                                      | 2.0×10 <sup>-5</sup> |
| 7     | 364.266 nm | 1%T <sub>1</sub> , 2%T <sub>2</sub> , 91%T <sub>3</sub> , 3%T <sub>4</sub>                    | 5.5×10 <sup>-6</sup> |
| 8     | 364.134 nm | 8%T <sub>1</sub> , 10%T <sub>2</sub> , 80%T <sub>3</sub> , 1%T <sub>4</sub>                   | 2.4×10 <sup>-6</sup> |
| 9     | 364.039 nm | 14%T <sub>1</sub> , 15%T <sub>2</sub> , 65%T <sub>3</sub> , 7%T <sub>4</sub>                  | 2.0×10 <sup>-7</sup> |
| 10    | 363.853 nm | 1%T <sub>3</sub> , 95%T <sub>4</sub>                                                          | 6.2×10 <sup>-6</sup> |
| 11    | 363.773 nm | 3%T <sub>1</sub> , 5%T <sub>2</sub> , 90%T <sub>4</sub>                                       | 1.8×10 <sup>-7</sup> |
| 12    | 363.755 nm | 6%T <sub>1</sub> , 6%T <sub>2</sub> , 2%T <sub>3</sub> , 85%T <sub>4</sub>                    | 5.0×10 <sup>-7</sup> |
| 13    | 309.371 nm | 43%T <sub>5</sub> , 42%T <sub>6</sub> , 14%T <sub>7</sub>                                     | 7.8×10 <sup>-7</sup> |
| 14    | 308.870 nm | 51%T <sub>5</sub> , 48%T <sub>6</sub>                                                         | 7.0×10 <sup>-6</sup> |
| 15    | 308.836 nm | 1%S <sub>1</sub> , 82%T <sub>5</sub> , 4%T <sub>6</sub> , 6%T <sub>7</sub> , 5%T <sub>8</sub> | 1.8×10 <sup>-4</sup> |
| 16    | 308.799 nm | 1%S <sub>2</sub> , 3%T <sub>5</sub> , 83%T <sub>6</sub> , 4%T <sub>7</sub> , 6%T <sub>8</sub> | 1.8×10 <sup>-4</sup> |
| 17    | 308.080 nm | 43%T <sub>5</sub> , 46%T <sub>6</sub> , 11%T <sub>8</sub>                                     | 3.3×10 <sup>-6</sup> |
| 18    | 307.679 nm | 49%T <sub>5</sub> , 51%T <sub>6</sub>                                                         | 1.0×10 <sup>-4</sup> |
| 19    | 306.264 nm | 2%S <sub>1</sub> , 20%S <sub>2</sub> , 67%T <sub>7</sub> , 11%T <sub>8</sub>                  | 0.0034               |
| 20    | 306.226 nm | 22%S <sub>1</sub> , 2%S <sub>2</sub> , 62%T <sub>7</sub> , 14%T <sub>8</sub>                  | 0.0037               |
| 21    | 305.159 nm | 7%T <sub>5</sub> , 6%T <sub>6</sub> , 86%T <sub>7</sub>                                       | 8.5×10 <sup>-7</sup> |
| 22    | 304.336 nm | 8%S <sub>1</sub> , 12%T <sub>5</sub> , 25%T <sub>7</sub> , 54%T <sub>8</sub>                  | 0.0015               |
| 23    | 304.230 nm | 7%S <sub>2</sub> , 11%T <sub>6</sub> , 20%T <sub>7</sub> , 61%T <sub>8</sub>                  | 0.0013               |
| 24    | 303.743 nm | 3%T <sub>5</sub> , 6%T <sub>6</sub> , 89%T <sub>8</sub>                                       | 6.2×10 <sup>-7</sup> |
| 25    | 302.207 nm | 67%S <sub>1</sub> , 6%T <sub>7</sub> , 26%T <sub>8</sub>                                      | 0.0177               |
| 26    | 302.151 nm | 69%S <sub>2</sub> , 8%T <sub>7</sub> , 22%T <sub>8</sub>                                      | 0.0179               |
| 27    | 282.176 nm | 100%T <sub>9</sub>                                                                            | 2.9×10 <sup>-7</sup> |
| 28    | 282.174 nm | 100%T <sub>9</sub>                                                                            | 3.9×10 <sup>-5</sup> |
| 29    | 282.174 nm | 100%T <sub>9</sub>                                                                            | 1.1×10 <sup>-4</sup> |
| 30    | 282.107 nm | 100%T <sub>10</sub>                                                                           | 3.0×10 <sup>-9</sup> |
| 31    | 282.104 nm | 100%T <sub>10</sub>                                                                           | 8.7×10 <sup>-5</sup> |
| 32    | 282.103 nm | 100%T <sub>10</sub>                                                                           | 1.5×10 <sup>-4</sup> |
| 33    | 277.395 nm | 100%T <sub>11</sub>                                                                           | 2.0×10 <sup>-8</sup> |
| 34    | 277.386 nm | 100%T <sub>11</sub>                                                                           | 1.9×10 <sup>-4</sup> |
| 35    | 277.386 nm | 100%T <sub>11</sub>                                                                           | 2.6×10 <sup>-4</sup> |
| 36    | 277.148 nm | 100%T <sub>12</sub>                                                                           | 1.2×10 <sup>-4</sup> |
| 37    | 277.147 nm | 100%T <sub>12</sub>                                                                           | 2.1×10 <sup>-4</sup> |
| 38    | 277.143 nm | 100%T <sub>12</sub>                                                                           | 2.5×10 <sup>-7</sup> |
| 39    | 274.880 nm | 90%T <sub>13</sub> , 10%T <sub>14</sub>                                                       | 3.6×10 <sup>-7</sup> |
| 40    | 274.873 nm | 89%T <sub>13</sub> , 11%T <sub>14</sub>                                                       | 3.1×10 <sup>-8</sup> |
| 41    | 274.861 nm | 100%T <sub>13</sub>                                                                           | 1.4×10 <sup>-5</sup> |

|    |            |                                         |                      |
|----|------------|-----------------------------------------|----------------------|
| 42 | 274.777 nm | 100%T <sub>14</sub>                     | 1.4×10 <sup>-5</sup> |
| 43 | 274.771 nm | 10%T <sub>13</sub> , 90%T <sub>14</sub> | 1.1×10 <sup>-6</sup> |
| 44 | 274.764 nm | 11%T <sub>13</sub> , 89%T <sub>14</sub> | 1.2×10 <sup>-8</sup> |
| 45 | 270.944 nm | 76%T <sub>15</sub> , 24%T <sub>16</sub> | 1.7×10 <sup>-6</sup> |
| 46 | 270.913 nm | 35%T <sub>15</sub> , 65%T <sub>16</sub> | 8.4×10 <sup>-7</sup> |
| 47 | 270.899 nm | 64%T <sub>15</sub> , 36%T <sub>16</sub> | 2.0×10 <sup>-7</sup> |
| 48 | 270.896 nm | 100%T <sub>15</sub>                     | 2.5×10 <sup>-5</sup> |
| 49 | 270.879 nm | 100%T <sub>16</sub>                     | 2.2×10 <sup>-5</sup> |
| 50 | 270.870 nm | 25%T <sub>15</sub> , 75%T <sub>16</sub> | 3.3×10 <sup>-7</sup> |

Table S2 SOC-free states of [Ir(tpy)<sub>2</sub>]<sup>3+</sup>

| State           | Wavelength | Composition                                                                                                                                                                                                                                                |
|-----------------|------------|------------------------------------------------------------------------------------------------------------------------------------------------------------------------------------------------------------------------------------------------------------|
| S <sub>1</sub>  | 304.208 nm | HOMO-6→LUMO+1 1%, HOMO-6→LUMO+2 1%, HOMO-3→HOMO 1%, HOMO-2→HOMO 14%, HOMO-2→LUMO 1%, HOMO-1→HOMO 73%, HOMO-1→LUMO 2%                                                                                                                                       |
| S <sub>2</sub>  | 304.075 nm | HOMO-7→LUMO+1 1%, HOMO-7→LUMO+2 1%, HOMO-3→LUMO 1%, HOMO-2→HOMO 1%, HOMO-2→LUMO 15%, HOMO-1→HOMO 2%, HOMO-1→LUMO 73%                                                                                                                                       |
| S <sub>3</sub>  | 261.170 nm | HOMO-5→HOMO 22%, HOMO-5→LUMO 12%, HOMO-4→HOMO 12%, HOMO-4→LUMO 24%, HOMO-3→LUMO+1 4%, HOMO-2→LUMO+2 9%, HOMO-1→LUMO+1 6%, HOMO-1→LUMO+3 3%                                                                                                                 |
| S <sub>4</sub>  | 260.322 nm | HOMO-7→LUMO+2 1%, HOMO-7→LUMO+3 1%, HOMO-5→HOMO 3%, HOMO-5→LUMO 3%, HOMO-4→HOMO 6%, HOMO-3→LUMO 36%, HOMO-2→HOMO 3%, HOMO-2→LUMO 18%, HOMO-2→LUMO+1 3%, HOMO-1→LUMO 4%, HOMO-1→LUMO+2 6%, HOMO-1→LUMO+4 1%                                                 |
| S <sub>5</sub>  | 260.533 nm | HOMO-10→LUMO+1 1%, HOMO-10→LUMO+2 1%, HOMO-6→LUMO+2 2%, HOMO-6→LUMO+3 2%, HOMO-6→LUMO+6 1%, HOMO-3→HOMO 46%, HOMO-2→HOMO 26%, HOMO-2→LUMO 3%, HOMO-1→HOMO 4%, HOMO-1→LUMO+5 1%                                                                             |
| S <sub>6</sub>  | 259.543 nm | HOMO-5→HOMO 3%, HOMO-5→LUMO 16%, HOMO-4→HOMO 13%, HOMO-4→LUMO 6%, HOMO-3→LUMO 11%, HOMO-2→LUMO 6%, HOMO-2→LUMO+1 10%, HOMO-1→LUMO 1%, HOMO-1→LUMO+2 18%, HOMO-1→LUMO+6 2%                                                                                  |
| S <sub>7</sub>  | 248.686 nm | HOMO-17→HOMO 2%, HOMO-16→LUMO 2%, HOMO-14→HOMO 1%, HOMO-13→LUMO 1%, HOMO-7→HOMO 3%, HOMO-6→LUMO 3%, HOMO-5→HOMO 33%, HOMO-5→LUMO 10%, HOMO-4→HOMO 10%, HOMO-4→LUMO 31%                                                                                     |
| S <sub>8</sub>  | 248.557 nm | HOMO-8→LUMO+2 1%, HOMO-3→LUMO+1 14%, HOMO-3→LUMO+3 2%, HOMO-2→LUMO+6 2%, HOMO-1→LUMO+1 66%                                                                                                                                                                 |
| S <sub>9</sub>  | 247.277 nm | HOMO-17→HOMO 1%, HOMO-16→LUMO 1%, HOMO-14→HOMO 1%, HOMO-13→LUMO 1%, HOMO-7→HOMO 2%, HOMO-6→LUMO 2%, HOMO-5→HOMO 14%, HOMO-5→LUMO 28%, HOMO-4→HOMO 27%, HOMO-4→LUMO 14%                                                                                     |
| S <sub>10</sub> | 240.466 nm | HOMO-12→LUMO 2%, HOMO-11→LUMO 2%, HOMO-7→LUMO+3 1%, HOMO-5→LUMO+1 18%, HOMO-5→LUMO+2 18%, HOMO-4→LUMO+1 16%, HOMO-4→LUMO+2 14%, HOMO-3→LUMO+7 2%, HOMO-2→LUMO+4 2%, HOMO-2→LUMO+5 2%, HOMO-2→LUMO+7 2%, HOMO-1→LUMO 1%, HOMO-1→LUMO+4 6%, HOMO-1→LUMO+5 4% |
| S <sub>11</sub> | 240.447 nm | HOMO-12→HOMO 2%, HOMO-11→HOMO 2%, HOMO-6→LUMO+3 1%,                                                                                                                                                                                                        |



|                 |            |                                                                                                                                                                                                                                                                                     |
|-----------------|------------|-------------------------------------------------------------------------------------------------------------------------------------------------------------------------------------------------------------------------------------------------------------------------------------|
|                 |            | HOMO-5→LUMO+1 16%, HOMO-5→LUMO+2 14%, HOMO-4→LUMO+1 19%, HOMO-4→LUMO+2 19%, HOMO-3→LUMO+8 2%, HOMO-2→LUMO+4 2%, HOMO-2→LUMO+5 2%, HOMO-2→LUMO+8 2%, HOMO-1→HOMO 1%, HOMO-1→LUMO+4 4%, HOMO-1→LUMO+5 6%                                                                              |
| S <sub>12</sub> | 237.155 nm | HOMO-10→HOMO 2%, HOMO-9→LUMO 2%, HOMO-8→LUMO+1 3%, HOMO-7→LUMO 5%, HOMO-7→LUMO+4 2%, HOMO-6→HOMO 5%, HOMO-6→LUMO+5 2%, HOMO-5→LUMO+4 1%, HOMO-4→LUMO+5 1%, HOMO-3→LUMO+2 23%, HOMO-2→LUMO+3 8%, HOMO-1→LUMO+2 30%, HOMO-1→LUMO+6 6%                                                 |
| S <sub>13</sub> | 226.348 nm | HOMO-10→LUMO+4 1%, HOMO-9→LUMO+5 1%, HOMO-8→LUMO+6 1%, HOMO-7→HOMO 2%, HOMO-7→LUMO 9%, HOMO-6→HOMO 10%, HOMO-6→LUMO 2%, HOMO-5→HOMO 5%, HOMO-5→LUMO 3%, HOMO-4→HOMO 3%, HOMO-4→LUMO 5%, HOMO-3→LUMO+1 12%, HOMO-3→LUMO+3 1%, HOMO-2→LUMO+2 12%, HOMO-1→LUMO+1 6%, HOMO-1→LUMO+3 14% |
| S <sub>14</sub> | 221.485 nm | HOMO-7→LUMO 10%, HOMO-6→HOMO 9%, HOMO-5→HOMO 4%, HOMO-5→LUMO 11%, HOMO-4→HOMO 10%, HOMO-4→LUMO 3%, HOMO-3→LUMO+2 6%, HOMO-2→LUMO+1 24%, HOMO-1→LUMO+2 12%                                                                                                                           |
| S <sub>15</sub> | 226.192 nm | HOMO-8→LUMO 1%, HOMO-5→LUMO+1 2%, HOMO-4→LUMO+1 2%, HOMO-3→HOMO 1%, HOMO-3→LUMO 25%, HOMO-2→HOMO 2%, HOMO-2→LUMO 44%, HOMO-1→LUMO 13%, HOMO-1→LUMO+4 2%, HOMO-1→LUMO+5 2%                                                                                                           |
| S <sub>16</sub> | 226 nm     | HOMO-8→HOMO 1%, HOMO-5→LUMO+1 1%, HOMO-4→LUMO+1 2%, HOMO-3→HOMO 26%, HOMO-3→LUMO 1%, HOMO-2→HOMO 44%, HOMO-2→LUMO 2%, HOMO-1→HOMO 13%, HOMO-1→LUMO+4 2%, HOMO-1→LUMO+5 2%                                                                                                           |
| S <sub>17</sub> | 214.225 nm | HOMO-16→LUMO+2 1%, HOMO-13→LUMO+1 1%, HOMO-13→LUMO+2 1%, HOMO-6→LUMO+2 3%, HOMO-5→LUMO+1 37%, HOMO-5→LUMO+2 1%, HOMO-5→LUMO+3 2%, HOMO-4→LUMO+1 3%, HOMO-4→LUMO+2 40%, HOMO-4→LUMO+6 3%                                                                                             |
| S <sub>18</sub> | 214.213 nm | HOMO-17→LUMO+2 1%, HOMO-14→LUMO+1 1%, HOMO-14→LUMO+2 1%, HOMO-7→LUMO+2 3%, HOMO-5→LUMO+1 3%, HOMO-5→LUMO+2 40%, HOMO-5→LUMO+6 3%, HOMO-4→LUMO+1 36%, HOMO-4→LUMO+2 1%, HOMO-4→LUMO+3 2%                                                                                             |
| S <sub>19</sub> | 209.795 nm | HOMO-18→LUMO+1 1%, HOMO-5→LUMO+5 1%, HOMO-4→LUMO+4 1%, HOMO-3→LUMO+1 23%, HOMO-2→LUMO+2 20%, HOMO-2→LUMO+6 3%, HOMO-1→LUMO+3 35%                                                                                                                                                    |
| S <sub>20</sub> | 208.395 nm | HOMO-18→LUMO+2 2%, HOMO-12→LUMO+1 1%, HOMO-11→LUMO+2 1%, HOMO-10→HOMO 2%, HOMO-9→LUMO 2%, HOMO-8→LUMO+1 3%, HOMO-7→LUMO 7%, HOMO-6→HOMO 7%, HOMO-3→LUMO+2 8%, HOMO-2→LUMO+1 29%, HOMO-2→LUMO+3 4%, HOMO-1→LUMO+2 17%, HOMO-1→LUMO+6 6%                                              |
| T <sub>1</sub>  | 366.314 nm | HOMO-7→LUMO+1 2%, HOMO-6→LUMO+1 1%, HOMO-6→LUMO+2 2%, HOMO-5→LUMO+1 1%, HOMO-4→LUMO+2 1%, HOMO-3→HOMO 1%, HOMO-2→HOMO 9%, HOMO-2→LUMO 16%, HOMO-2→LUMO+2 2%, HOMO-1→HOMO 35%, HOMO-1→LUMO 10%, HOMO-1→LUMO+1 2%                                                                     |
| T <sub>2</sub>  | 366.271 nm | HOMO-7→LUMO+2 2%, HOMO-6→LUMO+1 3%, HOMO-5→LUMO+2 1%, HOMO-4→LUMO+1 1%, HOMO-3→LUMO 1%, HOMO-2→HOMO 18%, HOMO-2→LUMO 8%, HOMO-2→LUMO+1 1%, HOMO-1→HOMO 12%, HOMO-1→LUMO 33%, HOMO-1→LUMO+2 1%                                                                                       |
| T <sub>3</sub>  | 365.740 nm | HOMO-12→LUMO+9 1%, HOMO-11→LUMO+10 1%, HOMO-6→HOMO 3%, HOMO-6→LUMO+8 3%, HOMO-5→HOMO 8%, HOMO-4→HOMO 7%, HOMO-4→LUMO 3%, HOMO-3→LUMO+1 6%, HOMO-2→LUMO 1%, HOMO-2→LUMO+1 4%, HOMO-2→LUMO+2 21%, HOMO-1→HOMO 2%,                                                                     |

|                 |            |                                                                                                                                                                                                                                                                                                                                                                                                   |
|-----------------|------------|---------------------------------------------------------------------------------------------------------------------------------------------------------------------------------------------------------------------------------------------------------------------------------------------------------------------------------------------------------------------------------------------------|
|                 |            | HOMO-1→LUMO 1%, HOMO-1→LUMO+1 22%, HOMO-1→LUMO+2 4%                                                                                                                                                                                                                                                                                                                                               |
| T <sub>4</sub>  | 365.309 nm | HOMO-12→LUMO+10 1%, HOMO-11→LUMO+9 1%, HOMO-7→LUMO 3%, HOMO-7→LUMO+7 2%, HOMO-5→LUMO 8%, HOMO-4→HOMO 3%, HOMO-4→LUMO 5%, HOMO-3→LUMO+2 5%, HOMO-2→LUMO 3%, HOMO-2→LUMO+1 24%, HOMO-2→LUMO+2 3%, HOMO-1→LUMO 5%, HOMO-1→LUMO+1 3%, HOMO-1→LUMO+2 20%                                                                                                                                               |
| T <sub>5</sub>  | 309.127 nm | HOMO-10→LUMO+2 2%, HOMO-10→LUMO+6 1%, HOMO-9→LUMO+1 2%, HOMO-9→LUMO+3 2%, HOMO-8→LUMO 6%, HOMO-8→LUMO+4 1%, HOMO-5→LUMO+1 2%, HOMO-5→LUMO+3 1%, HOMO-4→LUMO+2 2%, HOMO-3→HOMO 15%, HOMO-3→LUMO 28%, HOMO-3→LUMO+5 2%, HOMO-2→LUMO 10%, HOMO-1→HOMO 4%, HOMO-1→LUMO 8%, HOMO-1→LUMO+5 1%                                                                                                           |
| T <sub>6</sub>  | 309.098 nm | HOMO-10→LUMO+1 2%, HOMO-10→LUMO+3 2%, HOMO-9→LUMO+2 2%, HOMO-9→LUMO+6 1%, HOMO-8→HOMO 6%, HOMO-8→LUMO+5 1%, HOMO-5→LUMO+2 2%, HOMO-4→LUMO+1 2%, HOMO-4→LUMO+3 1%, HOMO-3→HOMO 28%, HOMO-3→LUMO 15%, HOMO-3→LUMO+4 2%, HOMO-2→HOMO 11%, HOMO-1→HOMO 8%, HOMO-1→LUMO 4%, HOMO-1→LUMO+4 1%                                                                                                           |
| T <sub>7</sub>  | 306.476 nm | HOMO-14→LUMO 1%, HOMO-10→LUMO+5 1%, HOMO-9→LUMO+4 1%, HOMO-8→LUMO+1 1%, HOMO-8→LUMO+3 2%, HOMO-7→LUMO 5%, HOMO-6→HOMO 4%, HOMO-5→HOMO 5%, HOMO-5→LUMO 20%, HOMO-5→LUMO+7 1%, HOMO-5→LUMO+8 1%, HOMO-4→HOMO 18%, HOMO-4→LUMO 7%, HOMO-4→LUMO+7 1%, HOMO-3→LUMO+6 2%, HOMO-2→LUMO+1 3%, HOMO-1→LUMO+2 11%                                                                                           |
| T <sub>8</sub>  | 305.030 nm | HOMO-13→HOMO 1%, HOMO-10→LUMO+4 1%, HOMO-9→LUMO+5 1%, HOMO-8→LUMO+2 1%, HOMO-7→HOMO 1%, HOMO-7→LUMO 4%, HOMO-6→HOMO 4%, HOMO-6→LUMO 1%, HOMO-5→HOMO 18%, HOMO-5→LUMO 8%, HOMO-5→LUMO+7 2%, HOMO-4→HOMO 10%, HOMO-4→LUMO 16%, HOMO-4→LUMO+8 2%, HOMO-3→LUMO+3 3%, HOMO-2→LUMO+2 2%, HOMO-1→LUMO+1 11%                                                                                              |
| T <sub>9</sub>  | 283.039 nm | HOMO-12→LUMO+2 2%, HOMO-12→LUMO+6 2%, HOMO-11→LUMO+1 2%, HOMO-11→LUMO+3 2%, HOMO-10→HOMO 2%, HOMO-10→LUMO 1%, HOMO-9→HOMO 1%, HOMO-7→HOMO 3%, HOMO-7→LUMO 6%, HOMO-7→LUMO+5 2%, HOMO-6→HOMO 14%, HOMO-6→LUMO 2%, HOMO-6→LUMO+4 3%, HOMO-6→LUMO+5 2%, HOMO-5→LUMO+5 5%, HOMO-4→LUMO+4 5%, HOMO-3→LUMO+1 2%, HOMO-3→LUMO+3 14%, HOMO-2→LUMO+6 9%, HOMO-1→LUMO+1 2%, HOMO-1→LUMO+3 2%                |
| T <sub>10</sub> | 282.961 nm | HOMO-12→LUMO+1 2%, HOMO-12→LUMO+3 2%, HOMO-11→LUMO+2 2%, HOMO-11→LUMO+6 1%, HOMO-10→HOMO 2%, HOMO-9→LUMO 4%, HOMO-8→LUMO+3 2%, HOMO-7→LUMO 16%, HOMO-7→LUMO+4 4%, HOMO-7→LUMO+5 1%, HOMO-6→HOMO 9%, HOMO-6→LUMO+5 2%, HOMO-5→LUMO+4 6%, HOMO-4→LUMO+5 5%, HOMO-3→LUMO+2 5%, HOMO-3→LUMO+6 10%, HOMO-2→LUMO+3 12%, HOMO-1→LUMO+2 1%                                                                |
| T <sub>11</sub> | 278.194 nm | HOMO-12→LUMO+1 3%, HOMO-11→LUMO+2 4%, HOMO-10→HOMO 6%, HOMO-10→LUMO 1%, HOMO-9→LUMO 9%, HOMO-9→LUMO+4 1%, HOMO-8→LUMO+1 4%, HOMO-8→LUMO+3 4%, HOMO-7→LUMO 2%, HOMO-7→LUMO+4 2%, HOMO-6→HOMO 1%, HOMO-6→LUMO+5 1%, HOMO-5→LUMO 3%, HOMO-4→HOMO 2%, HOMO-4→LUMO 1%, HOMO-3→LUMO+2 15%, HOMO-2→LUMO+1 9%, HOMO-2→LUMO+3 4%, HOMO-2→LUMO+10 1%, HOMO-1→LUMO+2 2%, HOMO-1→LUMO+6 12%, HOMO-1→LUMO+9 2% |
| T <sub>12</sub> | 277.962 nm | HOMO-12→LUMO+2 3%, HOMO-11→LUMO+1 4%, HOMO-10→HOMO 7%, HOMO-10→LUMO 4%, HOMO-10→LUMO+4 1%, HOMO-9→HOMO 5%, HOMO-9→LUMO 4%, HOMO-9→LUMO+5 1%, HOMO-8→LUMO+2 5%, HOMO-8→LUMO+6 3%, HOMO-5→HOMO 2%, HOMO-4→HOMO 1%,                                                                                                                                                                                  |

|                 |            |                                                                                                                                                                                                                                                                                                                                                                                                                                                                                           |
|-----------------|------------|-------------------------------------------------------------------------------------------------------------------------------------------------------------------------------------------------------------------------------------------------------------------------------------------------------------------------------------------------------------------------------------------------------------------------------------------------------------------------------------------|
|                 |            | HOMO-4→LUMO 1%, HOMO-3→LUMO+1 15%, HOMO-3→LUMO+3 2%,<br>HOMO-2→LUMO+2 7%, HOMO-2→LUMO+6 2%, HOMO-2→LUMO+9 1%,<br>HOMO-1→LUMO+3 14%, HOMO-1→LUMO+10 2%                                                                                                                                                                                                                                                                                                                                     |
| T <sub>13</sub> | 275.696 nm | HOMO-12→HOMO 4%, HOMO-12→LUMO+5 1%, HOMO-11→HOMO 4%,<br>HOMO-6→LUMO+3 12%, HOMO-6→LUMO+6 9%, HOMO-5→LUMO+3 3%,<br>HOMO-5→LUMO+6 2%, HOMO-4→LUMO+3 3%, HOMO-4→LUMO+6 2%,<br>HOMO-3→LUMO+4 5%, HOMO-3→LUMO+5 7%, HOMO-2→LUMO+4 9%,<br>HOMO-2→LUMO+5 14%, HOMO-1→HOMO 2%, HOMO-1→LUMO+4 5%,<br>HOMO-1→LUMO+5 7%                                                                                                                                                                              |
| T <sub>14</sub> | 275.612 nm | HOMO-12→LUMO 4%, HOMO-11→LUMO 5%, HOMO-7→LUMO+3 12%,<br>HOMO-7→LUMO+6 9%, HOMO-5→LUMO+3 3%, HOMO-5→LUMO+6 2%,<br>HOMO-4→LUMO+3 2%, HOMO-4→LUMO+6 2%, HOMO-3→LUMO+4 7%,<br>HOMO-3→LUMO+5 5%, HOMO-2→LUMO+4 14%, HOMO-2→LUMO+5 9%,<br>HOMO-1→LUMO 1%, HOMO-1→LUMO+4 7%, HOMO-1→LUMO+5 5%                                                                                                                                                                                                    |
| T <sub>15</sub> | 271.701 nm | HOMO-12→HOMO 1%, HOMO-12→LUMO 7%, HOMO-11→LUMO 10%,<br>HOMO-11→LUMO+4 1%, HOMO-7→LUMO+1 8%, HOMO-7→LUMO+2 6%,<br>HOMO-7→LUMO+9 2%, HOMO-7→LUMO+10 1%, HOMO-6→LUMO+1 2%,<br>HOMO-5→LUMO+1 2%, HOMO-5→LUMO+2 3%, HOMO-4→LUMO+1 4%,<br>HOMO-4→LUMO+2 1%, HOMO-3→LUMO+4 2%, HOMO-3→LUMO+7 5%,<br>HOMO-2→LUMO 2%, HOMO-2→LUMO+7 13%, HOMO-1→LUMO 5%,<br>HOMO-1→LUMO+7 8%                                                                                                                       |
| T <sub>16</sub> | 271.684 nm | HOMO-12→HOMO 7%, HOMO-12→LUMO 1%, HOMO-11→HOMO 11%,<br>HOMO-11→LUMO+5 1%, HOMO-7→LUMO+1 2%, HOMO-6→LUMO+1 8%,<br>HOMO-6→LUMO+2 6%, HOMO-6→LUMO+9 2%, HOMO-6→LUMO+10 1%,<br>HOMO-5→LUMO+1 4%, HOMO-5→LUMO+2 1%, HOMO-4→LUMO+1 2%,<br>HOMO-4→LUMO+2 3%, HOMO-3→LUMO+5 1%, HOMO-3→LUMO+8 5%,<br>HOMO-2→HOMO 2%, HOMO-2→LUMO+8 13%, HOMO-1→HOMO 5%,<br>HOMO-1→LUMO+5 1%, HOMO-1→LUMO+8 8%                                                                                                     |
| T <sub>17</sub> | 261.888 nm | HOMO-12→LUMO+2 5%, HOMO-12→LUMO+6 2%, HOMO-11→LUMO+1<br>8%, HOMO-8→LUMO+2 1%, HOMO-7→LUMO 3%, HOMO-7→LUMO+4 2%,<br>HOMO-7→LUMO+5 4%, HOMO-7→LUMO+7 2%, HOMO-6→HOMO 3%,<br>HOMO-6→LUMO+4 4%, HOMO-6→LUMO+5 2%, HOMO-6→LUMO+8 2%,<br>HOMO-5→LUMO+5 3%, HOMO-5→LUMO+7 1%, HOMO-4→LUMO+4 3%,<br>HOMO-4→LUMO+8 1%, HOMO-3→LUMO+1 7%, HOMO-3→LUMO+3 6%,<br>HOMO-3→LUMO+10 3%, HOMO-2→LUMO+2 1%, HOMO-2→LUMO+6 3%,<br>HOMO-2→LUMO+9 6%, HOMO-1→LUMO+1 8%, HOMO-1→LUMO+3 1%,<br>HOMO-1→LUMO+10 2% |
| T <sub>18</sub> | 260.491 nm | HOMO-12→LUMO+1 8%, HOMO-12→LUMO+3 1%, HOMO-11→LUMO+2<br>7%, HOMO-11→LUMO+6 2%, HOMO-8→LUMO+1 1%, HOMO-7→LUMO<br>4%, HOMO-7→LUMO+4 5%, HOMO-7→LUMO+5 1%, HOMO-7→LUMO+7<br>2%, HOMO-6→HOMO 4%, HOMO-6→LUMO+5 5%, HOMO-6→LUMO+8<br>2%, HOMO-5→LUMO 1%, HOMO-5→LUMO+4 3%, HOMO-4→LUMO+5 3%,<br>HOMO-4→LUMO+7 1%, HOMO-3→LUMO+2 1%, HOMO-3→LUMO+6 4%,<br>HOMO-3→LUMO+9 4%, HOMO-2→LUMO+3 6%, HOMO-2→LUMO+10 7%,<br>HOMO-1→LUMO+2 10%, HOMO-1→LUMO+6 1%, HOMO-1→LUMO+9 3%                       |
| T <sub>19</sub> | 258.395 nm | HOMO-17→LUMO+1 2%, HOMO-17→LUMO+2 2%, HOMO-14→LUMO+1<br>2%, HOMO-14→LUMO+2 2%, HOMO-9→LUMO+1 2%, HOMO-9→LUMO+2<br>2%, HOMO-7→LUMO+1 7%, HOMO-7→LUMO+2 7%, HOMO-5→LUMO+1<br>16%, HOMO-5→LUMO+2 16%, HOMO-5→LUMO+9 1%, HOMO-<br>5→LUMO+10 1%, HOMO-4→LUMO+1 13%, HOMO-4→LUMO+2 14%                                                                                                                                                                                                          |
| T <sub>20</sub> | 258.306 nm | HOMO-16→LUMO+1 2%, HOMO-16→LUMO+2 2%, HOMO-13→LUMO+1<br>2%, HOMO-13→LUMO+2 2%, HOMO-10→LUMO+1 2%, HOMO-<br>10→LUMO+2 2%, HOMO-6→LUMO+1 8%, HOMO-6→LUMO+2 7%, HOMO-<br>5→LUMO+1 13%, HOMO-5→LUMO+2 13%, HOMO-4→LUMO+1 16%,<br>HOMO-4→LUMO+2 16%, HOMO-4→LUMO+10 1%                                                                                                                                                                                                                         |

Table S3 SOC state of  $[\text{Ir}(\text{tpy})_2]^{3+} \cdot \text{PF}_6^-$ 

| State | Wavelength | Composition                                                                                     | $f$                  |
|-------|------------|-------------------------------------------------------------------------------------------------|----------------------|
| 1     | 367.785 nm | 92%T <sub>1</sub> , 7%T <sub>2</sub>                                                            | $1.3 \times 10^{-7}$ |
| 2     | 367.757 nm | 93%T <sub>1</sub> , 7%T <sub>2</sub>                                                            | $4.7 \times 10^{-6}$ |
| 3     | 367.723 nm | 99%T <sub>1</sub>                                                                               | $3.4 \times 10^{-7}$ |
| 4     | 366.884 nm | 98%T <sub>2</sub>                                                                               | $1.1 \times 10^{-6}$ |
| 5     | 366.831 nm | 6%T <sub>1</sub> , 92%T <sub>2</sub>                                                            | $7.2 \times 10^{-8}$ |
| 6     | 366.773 nm | 6%T <sub>1</sub> , 93%T <sub>2</sub>                                                            | $1.2 \times 10^{-5}$ |
| 7     | 363.778 nm | 97%T <sub>3</sub> , 1%T <sub>4</sub>                                                            | $8.7 \times 10^{-6}$ |
| 8     | 363.755 nm | 98%T <sub>3</sub>                                                                               | $3.2 \times 10^{-8}$ |
| 9     | 363.751 nm | 98%T <sub>3</sub>                                                                               | $7.5 \times 10^{-7}$ |
| 10    | 362.984 nm | 98%T <sub>4</sub>                                                                               | $8.5 \times 10^{-6}$ |
| 11    | 362.958 nm | 99%T <sub>4</sub>                                                                               | $1.2 \times 10^{-7}$ |
| 12    | 362.938 nm | 97%T <sub>4</sub>                                                                               | $3.8 \times 10^{-7}$ |
| 13    | 310.364 nm | 84%T <sub>5</sub> , 6%T <sub>6</sub> , 5%T <sub>7</sub> , 4%T <sub>8</sub>                      | $3.5 \times 10^{-5}$ |
| 14    | 310.218 nm | 89%T <sub>5</sub> , 4%T <sub>6</sub> , 4%T <sub>8</sub>                                         | $4.9 \times 10^{-5}$ |
| 15    | 309.982 nm | 95%T <sub>5</sub> , 2%T <sub>7</sub>                                                            | $2.9 \times 10^{-5}$ |
| 16    | 308.599 nm | 59%T <sub>6</sub> , 36%T <sub>7</sub>                                                           | $6.9 \times 10^{-5}$ |
| 17    | 308.400 nm | 10%T <sub>5</sub> , 61%T <sub>6</sub> , 26%T <sub>7</sub>                                       | $1.5 \times 10^{-4}$ |
| 18    | 308.079 nm | 3%S <sub>1</sub> , 3%S <sub>2</sub> , 90%T <sub>6</sub>                                         | $7.1 \times 10^{-4}$ |
| 19    | 306.727 nm | 4%T <sub>5</sub> , 92%T <sub>7</sub> , 2%T <sub>8</sub>                                         | $1.4 \times 10^{-4}$ |
| 20    | 306.149 nm | 7%S <sub>1</sub> , 3%S <sub>2</sub> , 30%T <sub>6</sub> , 39%T <sub>7</sub> , 20%T <sub>8</sub> | 0.0014               |
| 21    | 305.818 nm | 31%T <sub>6</sub> , 64%T <sub>7</sub> , 3%T <sub>8</sub>                                        | $1.9 \times 10^{-5}$ |
| 22    | 305.126 nm | 6%S <sub>1</sub> , 5%S <sub>2</sub> , 7%T <sub>6</sub> , 22%T <sub>7</sub> , 58%T <sub>8</sub>  | 0.0016               |
| 23    | 304.158 nm | 6%T <sub>5</sub> , 3%T <sub>7</sub> , 89%T <sub>8</sub>                                         | $9.4 \times 10^{-5}$ |
| 24    | 304.076 nm | 6%T <sub>5</sub> , 5%T <sub>7</sub> , 88%T <sub>8</sub>                                         | $8.0 \times 10^{-5}$ |
| 25    | 301.708 nm | 63%S <sub>1</sub> , 26%S <sub>2</sub> , 6%T <sub>6</sub> , 5%T <sub>8</sub>                     | 0.0241               |
| 26    | 301.320 nm | 19%S <sub>1</sub> , 61%S <sub>2</sub> , 18%T <sub>8</sub>                                       | 0.0216               |
| 27    | 283.862 nm | 100%T <sub>9</sub>                                                                              | $1.7 \times 10^{-6}$ |
| 28    | 283.861 nm | 100%T <sub>9</sub>                                                                              | $1.3 \times 10^{-5}$ |
| 29    | 283.860 nm | 100%T <sub>9</sub>                                                                              | $8.8 \times 10^{-5}$ |
| 30    | 282.757 nm | 100%T <sub>10</sub>                                                                             | $8.3 \times 10^{-7}$ |
| 31    | 282.757 nm | 100%T <sub>10</sub>                                                                             | $3.7 \times 10^{-6}$ |
| 32    | 282.754 nm | 100%T <sub>10</sub>                                                                             | $2.0 \times 10^{-4}$ |
| 33    | 277.306 nm | 100%T <sub>11</sub>                                                                             | $1.8 \times 10^{-5}$ |
| 34    | 277.302 nm | 100%T <sub>11</sub>                                                                             | $4.8 \times 10^{-5}$ |
| 35    | 277.299 nm | 100%T <sub>11</sub>                                                                             | $5.1 \times 10^{-4}$ |
| 36    | 276.687 nm | 99%T <sub>12</sub>                                                                              | $1.4 \times 10^{-4}$ |
| 37    | 276.686 nm | 99%T <sub>12</sub>                                                                              | $1.2 \times 10^{-4}$ |
| 38    | 276.682 nm | 100%T <sub>12</sub>                                                                             | $7.7 \times 10^{-5}$ |
| 39    | 276.281 nm | 100%T <sub>13</sub>                                                                             | $4.5 \times 10^{-5}$ |
| 40    | 276.269 nm | 99%T <sub>13</sub>                                                                              | $1.4 \times 10^{-5}$ |

|    |            |                     |                      |
|----|------------|---------------------|----------------------|
| 41 | 276.265 nm | 99%T <sub>13</sub>  | 2.5×10 <sup>-6</sup> |
| 42 | 274.461 nm | 100%T <sub>14</sub> | 2.3×10 <sup>-5</sup> |
| 43 | 274.455 nm | 100%T <sub>14</sub> | 1.3×10 <sup>-5</sup> |
| 44 | 274.449 nm | 100%T <sub>14</sub> | 1.5×10 <sup>-6</sup> |
| 45 | 271.318 nm | 98%T <sub>15</sub>  | 9.3×10 <sup>-5</sup> |
| 46 | 271.285 nm | 99%T <sub>15</sub>  | 3.4×10 <sup>-5</sup> |
| 47 | 271.272 nm | 99%T <sub>15</sub>  | 5.6×10 <sup>-6</sup> |
| 48 | 270.806 nm | 99%T <sub>16</sub>  | 6.4×10 <sup>-5</sup> |
| 49 | 270.791 nm | 99%T <sub>16</sub>  | 1.6×10 <sup>-5</sup> |
| 50 | 270.788 nm | 99%T <sub>16</sub>  | 4.9×10 <sup>-5</sup> |

Table S4 SOC-free states of [Ir(tpy)<sub>2</sub>]<sup>3+</sup>·PF<sub>6</sub><sup>-</sup>

| State           | Wavelength | Composition                                                                                                                                                                                                                    |
|-----------------|------------|--------------------------------------------------------------------------------------------------------------------------------------------------------------------------------------------------------------------------------|
| S <sub>1</sub>  | 303.172 nm | HOMO-7→LUMO+1 1%, HOMO-2→HOMO 15%, HOMO-2→LUMO 3%, HOMO-1→HOMO 38%, HOMO-1→LUMO 35%                                                                                                                                            |
| S <sub>2</sub>  | 302.865 nm | HOMO-2→HOMO 6%, HOMO-2→LUMO 8%, HOMO-1→HOMO 31%, HOMO-1→LUMO 44%                                                                                                                                                               |
| S <sub>3</sub>  | 262.639 nm | HOMO-5→HOMO 8%, HOMO-5→LUMO 4%, HOMO-4→HOMO 3%, HOMO-4→LUMO 45%, HOMO-3→LUMO 6%, HOMO-3→LUMO+1 3%, HOMO-2→LUMO 4%, HOMO-2→LUMO+2 7%, HOMO-1→LUMO+1 2%, HOMO-1→LUMO+2 6%, HOMO-1→LUMO+3 1%                                      |
| S <sub>4</sub>  | 262.045 nm | HOMO-10→LUMO+1 1%, HOMO-7→LUMO+1 1%, HOMO-5→HOMO 11%, HOMO-4→HOMO 2%, HOMO-4→LUMO 1%, HOMO-3→HOMO 33%, HOMO-2→HOMO 23%, HOMO-2→LUMO+1 2%, HOMO-1→HOMO 5%, HOMO-1→LUMO+1 2%, HOMO-1→LUMO+2 4%                                   |
| S <sub>5</sub>  | 260.099 nm | HOMO-5→HOMO 21%, HOMO-4→HOMO 5%, HOMO-3→HOMO 11%, HOMO-3→LUMO 16%, HOMO-3→LUMO+1 2%, HOMO-2→HOMO 1%, HOMO-2→LUMO 14%, HOMO-2→LUMO+1 5%, HOMO-1→LUMO 1%, HOMO-1→LUMO+1 2%, HOMO-1→LUMO+2 4%, HOMO-1→LUMO+3 1%, HOMO-1→LUMO+6 1% |
| S <sub>6</sub>  | 258.490 nm | HOMO-6→LUMO+2 1%, HOMO-5→HOMO 9%, HOMO-4→HOMO 2%, HOMO-4→LUMO 12%, HOMO-3→HOMO 4%, HOMO-3→LUMO 24%, HOMO-2→HOMO 2%, HOMO-2→LUMO 13%, HOMO-2→LUMO+1 6%, HOMO-1→LUMO 1%, HOMO-1→LUMO+2 8%, HOMO-1→LUMO+6 1%                      |
| S <sub>7</sub>  | 255.359 nm | HOMO-16→HOMO 2%, HOMO-13→HOMO 4%, HOMO-6→HOMO 4%, HOMO-5→HOMO 12%, HOMO-5→LUMO 3%, HOMO-4→HOMO 70%                                                                                                                             |
| S <sub>8</sub>  | 248.382 nm | HOMO-10→HOMO 2%, HOMO-9→LUMO 1%, HOMO-5→HOMO 1%, HOMO-3→LUMO+1 14%, HOMO-3→LUMO+3 2%, HOMO-2→LUMO+6 2%, HOMO-1→LUMO+1 61%, HOMO-1→LUMO+2 2%                                                                                    |
| S <sub>9</sub>  | 250.154 nm | HOMO-17→LUMO 3%, HOMO-14→LUMO 2%, HOMO-7→LUMO 6%, HOMO-5→HOMO 1%, HOMO-5→LUMO 74%, HOMO-4→HOMO 1%, HOMO-4→LUMO 6%                                                                                                              |
| S <sub>10</sub> | 240.522 nm | HOMO-11→LUMO 2%, HOMO-5→LUMO+1 11%, HOMO-4→LUMO+1 9%, HOMO-4→LUMO+2 42%, HOMO-3→LUMO+2 1%, HOMO-3→LUMO+8 2%, HOMO-2→LUMO+4 2%, HOMO-2→LUMO+8 2%, HOMO-1→LUMO 1%, HOMO-1→LUMO+3 2%, HOMO-1→LUMO+4 1%, HOMO-1→LUMO+5 7%          |
| S <sub>11</sub> | 240.068 nm | HOMO-12→HOMO 2%, HOMO-11→HOMO 1%, HOMO-5→LUMO+1 33%, HOMO-5→LUMO+2 17%, HOMO-4→LUMO+1 14%, HOMO-3→LUMO+7 2%, HOMO-2→LUMO+4 1%, HOMO-2→LUMO+5 3%, HOMO-2→LUMO+7                                                                 |

|                 |            |                                                                                                                                                                                                                                                                                                                                                                                     |
|-----------------|------------|-------------------------------------------------------------------------------------------------------------------------------------------------------------------------------------------------------------------------------------------------------------------------------------------------------------------------------------------------------------------------------------|
|                 |            | 2%, HOMO-1→HOMO 1%, HOMO-1→LUMO+4 7%, HOMO-1→LUMO+5 1%                                                                                                                                                                                                                                                                                                                              |
| S <sub>12</sub> | 236.746 nm | HOMO-9→LUMO 2%, HOMO-8→LUMO+1 2%, HOMO-7→HOMO 4%,<br>HOMO-7→LUMO+4 2%, HOMO-6→LUMO 5%, HOMO-6→LUMO+5 1%,<br>HOMO-4→LUMO+2 2%, HOMO-3→LUMO+2 20%, HOMO-2→LUMO+3 6%,<br>HOMO-2→LUMO+5 1%, HOMO-1→LUMO+2 29%, HOMO-1→LUMO+6 5%                                                                                                                                                         |
| S <sub>13</sub> | 226.761 nm | HOMO-10→LUMO+4 1%, HOMO-8→LUMO+6 1%, HOMO-7→HOMO 9%,<br>HOMO-7→LUMO 2%, HOMO-6→HOMO 2%, HOMO-6→LUMO 10%,<br>HOMO-5→HOMO 5%, HOMO-5→LUMO 1%, HOMO-4→HOMO 1%, HOMO-<br>4→LUMO 8%, HOMO-3→LUMO+1 11%, HOMO-2→LUMO+2 11%, HOMO-<br>1→LUMO+1 5%, HOMO-1→LUMO+2 1%, HOMO-1→LUMO+3 11%, HOMO-<br>1→LUMO+5 2%                                                                               |
| S <sub>14</sub> | 222.063 nm | HOMO-7→HOMO 10%, HOMO-6→LUMO 8%, HOMO-5→HOMO 14%,<br>HOMO-4→LUMO 12%, HOMO-3→LUMO+2 5%, HOMO-2→LUMO+1 23%,<br>HOMO-1→LUMO+2 13%                                                                                                                                                                                                                                                     |
| S <sub>15</sub> | 227.158 nm | HOMO-8→HOMO 1%, HOMO-5→HOMO 2%, HOMO-5→LUMO+1 3%,<br>HOMO-3→HOMO 24%, HOMO-2→HOMO 42%, HOMO-1→HOMO 17%,<br>HOMO-1→LUMO+4 2%, HOMO-1→LUMO+5 1%                                                                                                                                                                                                                                       |
| S <sub>16</sub> | 220.054 nm | HOMO-13→LUMO+1 3%, HOMO-6→LUMO+1 2%, HOMO-6→LUMO+2 1%,<br>HOMO-5→LUMO+1 7%, HOMO-5→LUMO+2 2%, HOMO-4→LUMO+1 54%,<br>HOMO-4→LUMO+2 16%, HOMO-4→LUMO+6 2%, HOMO-3→LUMO 1%,<br>HOMO-2→LUMO 2%                                                                                                                                                                                          |
| S <sub>17</sub> | 222.142 nm | HOMO-5→LUMO+2 1%, HOMO-4→LUMO+2 7%, HOMO-3→HOMO 1%,<br>HOMO-3→LUMO 23%, HOMO-2→LUMO 46%, HOMO-1→LUMO 9%,<br>HOMO-1→LUMO+3 2%, HOMO-1→LUMO+4 1%, HOMO-1→LUMO+5 1%                                                                                                                                                                                                                    |
| S <sub>18</sub> | 214.105 nm | HOMO-17→LUMO+2 1%, HOMO-14→LUMO+2 1%, HOMO-7→LUMO+2<br>3%, HOMO-6→LUMO 1%, HOMO-5→LUMO+1 13%, HOMO-5→LUMO+2<br>34%, HOMO-5→LUMO+3 1%, HOMO-5→LUMO+6 2%, HOMO-4→LUMO+1<br>2%, HOMO-4→LUMO+2 5%, HOMO-3→LUMO+1 5%, HOMO-3→LUMO+2<br>4%, HOMO-2→LUMO+1 1%, HOMO-2→LUMO+2 6%, HOMO-1→LUMO+2<br>1%, HOMO-1→LUMO+3 5%, HOMO-1→LUMO+5 2%                                                   |
| S <sub>19</sub> | 210.533 nm | HOMO-10→HOMO 2%, HOMO-7→HOMO 4%, HOMO-5→LUMO+1 3%,<br>HOMO-5→LUMO+2 3%, HOMO-3→HOMO 2%, HOMO-3→LUMO+1 14%,<br>HOMO-2→LUMO+1 10%, HOMO-2→LUMO+2 8%, HOMO-2→LUMO+3 2%,<br>HOMO-2→LUMO+4 1%, HOMO-2→LUMO+6 2%, HOMO-1→LUMO+1 1%,<br>HOMO-1→LUMO+2 4%, HOMO-1→LUMO+3 18%, HOMO-1→LUMO+4 2%,<br>HOMO-1→LUMO+5 2%, HOMO-1→LUMO+6 1%                                                       |
| S <sub>20</sub> | 208.495 nm | HOMO-11→LUMO+2 1%, HOMO-9→LUMO 1%, HOMO-8→LUMO+1 1%,<br>HOMO-7→HOMO 3%, HOMO-7→LUMO+2 1%, HOMO-6→LUMO 4%,<br>HOMO-5→LUMO+1 2%, HOMO-5→LUMO+2 18%, HOMO-3→HOMO 2%,<br>HOMO-3→LUMO+1 2%, HOMO-3→LUMO+2 5%, HOMO-2→LUMO+1 13%,<br>HOMO-2→LUMO+2 6%, HOMO-2→LUMO+3 2%, HOMO-1→LUMO+1 1%,<br>HOMO-1→LUMO+2 8%, HOMO-1→LUMO+3 4%, HOMO-1→LUMO+4 1%,<br>HOMO-1→LUMO+5 4%, HOMO-1→LUMO+6 3% |
| T <sub>1</sub>  | 369.137 nm | HOMO-7→HOMO 2%, HOMO-7→LUMO+1 2%, HOMO-7→LUMO+7 2%,<br>HOMO-5→HOMO 7%, HOMO-3→HOMO 1%, HOMO-3→LUMO+1 4%,<br>HOMO-3→LUMO+2 1%, HOMO-2→HOMO 13%, HOMO-2→LUMO+1 15%,<br>HOMO-2→LUMO+2 4%, HOMO-1→HOMO 17%, HOMO-1→LUMO 2%,<br>HOMO-1→LUMO+1 10%, HOMO-1→LUMO+2 3%                                                                                                                      |
| T <sub>2</sub>  | 368.252 nm | HOMO-11→LUMO+8 2%, HOMO-6→LUMO 1%, HOMO-6→LUMO+1 2%,<br>HOMO-6→LUMO+2 3%, HOMO-4→LUMO 4%, HOMO-2→LUMO 18%,<br>HOMO-2→LUMO+2 4%, HOMO-1→LUMO 43%, HOMO-1→LUMO+1 3%,<br>HOMO-1→LUMO+2 2%                                                                                                                                                                                              |
| T <sub>3</sub>  | 365.201 nm | HOMO-7→HOMO 2%, HOMO-7→LUMO+1 3%, HOMO-7→LUMO+2 1%,<br>HOMO-7→LUMO+7 1%, HOMO-5→HOMO 8%, HOMO-5→LUMO+1 1%,                                                                                                                                                                                                                                                                          |

|                 |            |                                                                                                                                                                                                                                                                                                                                                                                                         |
|-----------------|------------|---------------------------------------------------------------------------------------------------------------------------------------------------------------------------------------------------------------------------------------------------------------------------------------------------------------------------------------------------------------------------------------------------------|
|                 |            | HOMO-4→HOMO 1%, HOMO-3→LUMO+1 3%, HOMO-2→HOMO 20%,<br>HOMO-2→LUMO+1 7%, HOMO-2→LUMO+2 6%, HOMO-1→HOMO 23%,<br>HOMO-1→LUMO+1 7%                                                                                                                                                                                                                                                                          |
| T <sub>4</sub>  | 364.420 nm | HOMO-6→LUMO 3%, HOMO-6→LUMO+2 1%, HOMO-6→LUMO+8 3%,<br>HOMO-4→LUMO 13%, HOMO-3→LUMO+2 4%, HOMO-2→HOMO 1%,<br>HOMO-2→LUMO 4%, HOMO-2→LUMO+1 10%, HOMO-2→LUMO+2 11%,<br>HOMO-1→LUMO 9%, HOMO-1→LUMO+1 4%, HOMO-1→LUMO+2 21%                                                                                                                                                                               |
| T <sub>5</sub>  | 310.633 nm | HOMO-10→LUMO+1 2%, HOMO-10→LUMO+2 1%, HOMO-10→LUMO+6<br>1%, HOMO-8→HOMO 5%, HOMO-5→HOMO 1%, HOMO-5→LUMO+1 3%,<br>HOMO-4→LUMO 1%, HOMO-3→HOMO 38%, HOMO-3→LUMO 4%,<br>HOMO-3→LUMO+1 1%, HOMO-3→LUMO+5 2%, HOMO-2→HOMO 7%,<br>HOMO-1→HOMO 11%, HOMO-1→LUMO 1%                                                                                                                                             |
| T <sub>6</sub>  | 308.429 nm | HOMO-13→LUMO 2%, HOMO-9→LUMO+8 1%, HOMO-6→LUMO 8%,<br>HOMO-5→HOMO 2%, HOMO-5→LUMO 4%, HOMO-4→LUMO 45%,<br>HOMO-4→LUMO+8 4%, HOMO-3→LUMO+6 1%, HOMO-2→LUMO+1 1%,<br>HOMO-1→LUMO+1 2%, HOMO-1→LUMO+2 9%                                                                                                                                                                                                   |
| T <sub>7</sub>  | 307.611 nm | HOMO-9→LUMO+2 3%, HOMO-9→LUMO+3 1%, HOMO-9→LUMO+6 1%,<br>HOMO-8→LUMO 6%, HOMO-4→LUMO+2 2%, HOMO-4→LUMO+3 1%,<br>HOMO-3→HOMO 5%, HOMO-3→LUMO 37%, HOMO-3→LUMO+4 2%,<br>HOMO-2→LUMO 13%, HOMO-1→HOMO 2%, HOMO-1→LUMO 8%                                                                                                                                                                                   |
| T <sub>8</sub>  | 305.316 nm | HOMO-14→HOMO 2%, HOMO-10→LUMO+4 2%, HOMO-10→LUMO+7 1%,<br>HOMO-7→HOMO 8%, HOMO-6→HOMO 1%, HOMO-5→HOMO 42%,<br>HOMO-5→LUMO+7 3%, HOMO-4→HOMO 6%, HOMO-4→LUMO 1%,<br>HOMO-3→LUMO+3 1%, HOMO-2→LUMO+1 2%, HOMO-2→LUMO+2 1%,<br>HOMO-1→HOMO 1%, HOMO-1→LUMO+1 8%, HOMO-1→LUMO+2 1%                                                                                                                          |
| T <sub>9</sub>  | 284.748 nm | HOMO-11→LUMO+2 2%, HOMO-11→LUMO+3 1%, HOMO-9→LUMO 4%,<br>HOMO-7→LUMO 3%, HOMO-6→LUMO 22%, HOMO-6→LUMO+3 1%,<br>HOMO-6→LUMO+4 4%, HOMO-6→LUMO+5 4%, HOMO-4→LUMO+3 2%,<br>HOMO-4→LUMO+4 4%, HOMO-4→LUMO+5 4%, HOMO-4→LUMO+8 1%,<br>HOMO-3→LUMO+2 2%, HOMO-3→LUMO+3 5%, HOMO-3→LUMO+5 3%,<br>HOMO-3→LUMO+6 4%, HOMO-2→LUMO+3 4%, HOMO-2→LUMO+5 3%,<br>HOMO-2→LUMO+6 5%, HOMO-1→LUMO+3 2%, HOMO-1→LUMO+6 1% |
| T <sub>10</sub> | 283.631 nm | HOMO-12→LUMO+1 2%, HOMO-12→LUMO+2 1%, HOMO-12→LUMO+3<br>1%, HOMO-11→LUMO+1 1%, HOMO-10→HOMO 4%, HOMO-7→HOMO<br>23%, HOMO-7→LUMO+4 5%, HOMO-7→LUMO+5 2%, HOMO-6→HOMO<br>3%, HOMO-5→LUMO+4 6%, HOMO-5→LUMO+5 3%, HOMO-5→LUMO+7<br>1%, HOMO-3→LUMO+1 1%, HOMO-3→LUMO+2 1%, HOMO-3→LUMO+3<br>5%, HOMO-3→LUMO+6 6%, HOMO-2→LUMO+3 6%, HOMO-2→LUMO+6<br>5%, HOMO-1→LUMO+1 1%                                  |
| T <sub>11</sub> | 278.107 nm | HOMO-12→LUMO+1 3%, HOMO-11→LUMO+2 2%, HOMO-10→HOMO<br>14%, HOMO-10→LUMO+4 1%, HOMO-9→HOMO 4%, HOMO-8→LUMO+1<br>4%, HOMO-8→LUMO+3 2%, HOMO-7→HOMO 1%, HOMO-7→LUMO+5<br>1%, HOMO-5→HOMO 5%, HOMO-3→LUMO+1 9%, HOMO-3→LUMO+2<br>8%, HOMO-2→LUMO+1 7%, HOMO-2→LUMO+3 2%, HOMO-2→LUMO+6<br>1%, HOMO-1→LUMO+3 2%, HOMO-1→LUMO+6 8%, HOMO-1→LUMO+9<br>2%                                                       |
| T <sub>12</sub> | 277.497 nm | HOMO-12→LUMO+2 1%, HOMO-11→LUMO+1 2%, HOMO-11→LUMO+2<br>3%, HOMO-10→HOMO 1%, HOMO-10→LUMO 3%, HOMO-9→LUMO 13%,<br>HOMO-8→LUMO+2 3%, HOMO-8→LUMO+6 2%, HOMO-6→LUMO 1%,<br>HOMO-6→LUMO+3 3%, HOMO-4→LUMO 3%, HOMO-3→LUMO+1 6%,<br>HOMO-3→LUMO+2 6%, HOMO-3→LUMO+4 1%, HOMO-3→LUMO+5 1%,<br>HOMO-2→LUMO+2 6%, HOMO-2→LUMO+3 1%, HOMO-1→LUMO+3 10%,<br>HOMO-1→LUMO+6 3%, HOMO-1→LUMO+10 2%                  |
| T <sub>13</sub> | 277.110 nm | HOMO-12→LUMO 2%, HOMO-11→LUMO 6%, HOMO-9→LUMO 2%,<br>HOMO-7→LUMO+3 1%, HOMO-6→LUMO+3 7%, HOMO-6→LUMO+5 3%,                                                                                                                                                                                                                                                                                              |

|                 |            |                                                                                                                                                                                                                                                                                                                                                                                                                                                                                                                                                                   |
|-----------------|------------|-------------------------------------------------------------------------------------------------------------------------------------------------------------------------------------------------------------------------------------------------------------------------------------------------------------------------------------------------------------------------------------------------------------------------------------------------------------------------------------------------------------------------------------------------------------------|
|                 |            | HOMO-6→LUMO+6 7%, HOMO-4→LUMO+3 4%, HOMO-4→LUMO+6 3%,<br>HOMO-3→LUMO+2 1%, HOMO-3→LUMO+3 3%, HOMO-3→LUMO+4 3%,<br>HOMO-3→LUMO+5 3%, HOMO-2→LUMO+3 3%, HOMO-2→LUMO+4 7%,<br>HOMO-2→LUMO+5 7%, HOMO-1→LUMO 1%, HOMO-1→LUMO+3 1%,<br>HOMO-1→LUMO+4 5%, HOMO-1→LUMO+5 9%                                                                                                                                                                                                                                                                                              |
| T <sub>14</sub> | 275.288 nm | HOMO-12→HOMO 7%, HOMO-11→HOMO 4%, HOMO-7→LUMO+3 8%,<br>HOMO-7→LUMO+4 1%, HOMO-7→LUMO+6 7%, HOMO-6→LUMO+3 1%,<br>HOMO-5→LUMO+3 4%, HOMO-5→LUMO+6 4%, HOMO-3→LUMO+4 6%,<br>HOMO-3→LUMO+5 5%, HOMO-2→LUMO+4 13%, HOMO-2→LUMO+5<br>10%, HOMO-1→HOMO 1%, HOMO-1→LUMO+4 7%, HOMO-1→LUMO+5<br>3%                                                                                                                                                                                                                                                                         |
| T <sub>15</sub> | 272.067 nm | HOMO-12→HOMO 6%, HOMO-12→LUMO 2%, HOMO-12→LUMO+5 1%,<br>HOMO-11→HOMO 4%, HOMO-11→LUMO 4%, HOMO-11→LUMO+4 1%,<br>HOMO-8→LUMO+5 1%, HOMO-7→LUMO+1 5%, HOMO-7→LUMO+2 4%,<br>HOMO-7→LUMO+9 2%, HOMO-6→LUMO+1 5%, HOMO-6→LUMO+2 2%,<br>HOMO-6→LUMO+10 1%, HOMO-5→LUMO+1 4%, HOMO-5→LUMO+2 2%,<br>HOMO-4→LUMO+1 3%, HOMO-3→LUMO+4 2%, HOMO-3→LUMO+7 4%,<br>HOMO-2→HOMO 2%, HOMO-2→LUMO+7 7%, HOMO-2→LUMO+8 6%,<br>HOMO-1→HOMO 4%, HOMO-1→LUMO 1%, HOMO-1→LUMO+7 6%,<br>HOMO-1→LUMO+8 2%                                                                                 |
| T <sub>16</sub> | 271.575 nm | HOMO-12→HOMO 3%, HOMO-12→LUMO 2%, HOMO-12→LUMO+4 1%,<br>HOMO-11→LUMO 10%, HOMO-11→LUMO+5 2%, HOMO-7→LUMO+1 6%,<br>HOMO-6→LUMO+1 2%, HOMO-6→LUMO+2 8%, HOMO-6→LUMO+9 2%,<br>HOMO-5→LUMO+1 4%, HOMO-4→LUMO+2 5%, HOMO-3→LUMO+5 2%,<br>HOMO-3→LUMO+7 1%, HOMO-3→LUMO+8 4%, HOMO-2→LUMO+7 7%,<br>HOMO-2→LUMO+8 6%, HOMO-1→HOMO 1%, HOMO-1→LUMO 4%,<br>HOMO-1→LUMO+8 9%                                                                                                                                                                                                |
| T <sub>17</sub> | 262.466 nm | HOMO-12→LUMO+2 4%, HOMO-12→LUMO+6 1%, HOMO-11→LUMO+1<br>7%, HOMO-11→LUMO+2 2%, HOMO-9→LUMO 1%, HOMO-8→LUMO+2<br>2%, HOMO-7→HOMO 2%, HOMO-7→LUMO+5 3%, HOMO-7→LUMO+7<br>1%, HOMO-6→LUMO 4%, HOMO-6→LUMO+3 1%, HOMO-6→LUMO+4 4%,<br>HOMO-6→LUMO+5 2%, HOMO-6→LUMO+8 2%, HOMO-5→LUMO+5 1%,<br>HOMO-5→LUMO+7 1%, HOMO-4→LUMO 1%, HOMO-4→LUMO+4 2%,<br>HOMO-4→LUMO+8 2%, HOMO-3→LUMO+1 6%, HOMO-3→LUMO+3 3%,<br>HOMO-3→LUMO+5 1%, HOMO-3→LUMO+10 3%, HOMO-2→LUMO+6 3%,<br>HOMO-2→LUMO+9 5%, HOMO-1→LUMO+1 7%, HOMO-1→LUMO+2 1%,<br>HOMO-1→LUMO+3 1%, HOMO-1→LUMO+10 3% |
| T <sub>18</sub> | 261.223 nm | HOMO-12→LUMO+1 8%, HOMO-11→LUMO+2 7%, HOMO-11→LUMO+6<br>2%, HOMO-8→LUMO+1 1%, HOMO-7→HOMO 4%, HOMO-7→LUMO+4<br>6%, HOMO-7→LUMO+5 1%, HOMO-7→LUMO+7 2%, HOMO-6→LUMO 3%,<br>HOMO-6→LUMO+3 1%, HOMO-6→LUMO+5 4%, HOMO-6→LUMO+8 2%,<br>HOMO-5→HOMO 1%, HOMO-5→LUMO+4 3%, HOMO-5→LUMO+7 2%,<br>HOMO-4→LUMO+5 2%, HOMO-4→LUMO+8 1%, HOMO-3→LUMO+2 1%,<br>HOMO-3→LUMO+6 4%, HOMO-3→LUMO+9 4%, HOMO-2→LUMO+3 4%,<br>HOMO-2→LUMO+5 1%, HOMO-2→LUMO+10 6%, HOMO-1→LUMO+1 1%,<br>HOMO-1→LUMO+2 8%, HOMO-1→LUMO+6 1%, HOMO-1→LUMO+9 3%                                        |
| T <sub>19</sub> | 259.415 nm | HOMO-16→LUMO+2 1%, HOMO-13→LUMO+1 1%, HOMO-13→LUMO+2<br>3%, HOMO-9→LUMO+1 1%, HOMO-9→LUMO+2 3%, HOMO-7→LUMO+2<br>1%, HOMO-6→LUMO+1 4%, HOMO-6→LUMO+2 9%, HOMO-5→LUMO+1<br>1%, HOMO-5→LUMO+2 4%, HOMO-4→HOMO 1%, HOMO-4→LUMO+1<br>14%, HOMO-4→LUMO+2 39%, HOMO-4→LUMO+9 1%, HOMO-<br>4→LUMO+10 3%                                                                                                                                                                                                                                                                  |
| T <sub>20</sub> | 257.504 nm | HOMO-17→LUMO+1 3%, HOMO-17→LUMO+2 1%, HOMO-14→LUMO+1<br>2%, HOMO-10→LUMO+1 3%, HOMO-10→LUMO+2 1%, HOMO-<br>7→LUMO+1 10%, HOMO-7→LUMO+2 3%, HOMO-6→LUMO+1 2%, HOMO-<br>5→LUMO+1 36%, HOMO-5→LUMO+2 13%, HOMO-5→LUMO+9 2%,                                                                                                                                                                                                                                                                                                                                          |



HOMO-5→LUMO+10 1%, HOMO-4→LUMO+1 5%, HOMO-4→LUMO+2 2%,  
HOMO-3→HOMO 1%

Table S5 SOC states of  $[\text{Ir}(\text{tpy})_2]^{3+}\cdot\text{Cl}^-$

| State | Wavelength | Composition                                                                  | $f$                  |
|-------|------------|------------------------------------------------------------------------------|----------------------|
| 1     | 368.509 nm | 94%T <sub>1</sub> , 5%T <sub>2</sub>                                         | 2.7×10 <sup>-8</sup> |
| 2     | 368.479 nm | 95%T <sub>1</sub> , 5%T <sub>2</sub>                                         | 6.8×10 <sup>-6</sup> |
| 3     | 368.445 nm | 99%T <sub>1</sub>                                                            | 7.1×10 <sup>-7</sup> |
| 4     | 367.373 nm | 94%T <sub>2</sub> , 6%T <sub>3</sub>                                         | 1.2×10 <sup>-6</sup> |
| 5     | 367.320 nm | 5%T <sub>1</sub> , 89%T <sub>2</sub> , 5%T <sub>3</sub>                      | 1.4×10 <sup>-8</sup> |
| 6     | 367.202 nm | 5%T <sub>1</sub> , 94%T <sub>2</sub>                                         | 1.4×10 <sup>-5</sup> |
| 7     | 365.655 nm | 100%T <sub>3</sub>                                                           | 1.1×10 <sup>-5</sup> |
| 8     | 365.551 nm | 6%T <sub>2</sub> , 94%T <sub>3</sub>                                         | 1.1×10 <sup>-7</sup> |
| 9     | 365.549 nm | 6%T <sub>2</sub> , 94%T <sub>3</sub>                                         | 4.6×10 <sup>-7</sup> |
| 10    | 363.605 nm | 99%T <sub>4</sub>                                                            | 1.1×10 <sup>-5</sup> |
| 11    | 363.593 nm | 99%T <sub>4</sub>                                                            | 2.4×10 <sup>-7</sup> |
| 12    | 363.568 nm | 99%T <sub>4</sub>                                                            | 1.1×10 <sup>-8</sup> |
| 13    | 350.040 nm | 28%T <sub>32</sub> , 70%T <sub>35</sub>                                      | 1.7×10 <sup>-5</sup> |
| 14    | 349.964 nm | 28%T <sub>32</sub> , 71%T <sub>35</sub>                                      | 2.6×10 <sup>-6</sup> |
| 15    | 348.351 nm | 2%T <sub>23</sub> , 96%T <sub>35</sub>                                       | 8.0×10 <sup>-7</sup> |
| 16    | 346.045 nm | 33%T <sub>23</sub> , 65%T <sub>32</sub>                                      | 6.8×10 <sup>-6</sup> |
| 17    | 345.343 nm | 85%T <sub>23</sub> , 8%T <sub>32</sub> , 6%T <sub>35</sub>                   | 7.1×10 <sup>-6</sup> |
| 18    | 345.216 nm | 99%T <sub>23</sub>                                                           | 2.5×10 <sup>-6</sup> |
| 19    | 344.613 nm | 64%T <sub>23</sub> , 34%T <sub>32</sub>                                      | 1.3×10 <sup>-5</sup> |
| 20    | 343.728 nm | 71%T <sub>32</sub> , 28%T <sub>35</sub>                                      | 5.2×10 <sup>-6</sup> |
| 21    | 343.474 nm | 13%T <sub>23</sub> , 63%T <sub>32</sub> , 24%T <sub>35</sub>                 | 4.0×10 <sup>-7</sup> |
| 22    | 328.600 nm | 99%T <sub>26</sub>                                                           | 2.1×10 <sup>-7</sup> |
| 23    | 328.577 nm | 100%T <sub>26</sub>                                                          | 5.8×10 <sup>-6</sup> |
| 24    | 328.576 nm | 100%T <sub>26</sub>                                                          | 3.2×10 <sup>-5</sup> |
| 25    | 314.507 nm | 94%T <sub>5</sub> , 2%T <sub>7</sub>                                         | 4.6×10 <sup>-5</sup> |
| 26    | 314.419 nm | 2%S <sub>1</sub> , 95%T <sub>5</sub> , 2%T <sub>18</sub>                     | 7.6×10 <sup>-5</sup> |
| 27    | 314.383 nm | 96%T <sub>5</sub> , 4%T <sub>7</sub>                                         | 1.7×10 <sup>-6</sup> |
| 28    | 311.387 nm | 1%S <sub>1</sub> , 88%T <sub>6</sub> , 4%T <sub>8</sub>                      | 1.5×10 <sup>-4</sup> |
| 29    | 311.261 nm | 91%T <sub>6</sub> , 6%T <sub>8</sub>                                         | 1.4×10 <sup>-5</sup> |
| 30    | 311.117 nm | 91%T <sub>6</sub> , 4%T <sub>7</sub> , 3%T <sub>18</sub>                     | 5.7×10 <sup>-5</sup> |
| 31    | 310.551 nm | 4%T <sub>6</sub> , 2%T <sub>7</sub> , 91%T <sub>18</sub> , 1%T <sub>24</sub> | 7.6×10 <sup>-5</sup> |
| 32    | 310.291 nm | 1%S <sub>1</sub> , 2%T <sub>5</sub> , 3%T <sub>6</sub> , 91%T <sub>18</sub>  | 2.0×10 <sup>-4</sup> |
| 33    | 310.179 nm | 1%T <sub>5</sub> , 95%T <sub>18</sub>                                        | 1.4×10 <sup>-4</sup> |
| 34    | 307.905 nm | 2%S <sub>2</sub> , 90%T <sub>7</sub> , 4%T <sub>8</sub>                      | 4.4×10 <sup>-4</sup> |
| 35    | 307.644 nm | 5%S <sub>2</sub> , 82%T <sub>7</sub> , 4%T <sub>8</sub> , 4%T <sub>18</sub>  | 6.2×10 <sup>-4</sup> |
| 36    | 307.358 nm | 2%T <sub>5</sub> , 91%T <sub>7</sub> , 2%T <sub>18</sub>                     | 1.2×10 <sup>-6</sup> |
| 37    | 306.483 nm | 19%S <sub>2</sub> , 14%T <sub>7</sub> , 66%T <sub>8</sub>                    | 0.0027               |
| 38    | 305.261 nm | 1%S <sub>1</sub> , 6%T <sub>6</sub> , 91%T <sub>8</sub>                      | 4.0×10 <sup>-4</sup> |

|    |            |                                               |                      |
|----|------------|-----------------------------------------------|----------------------|
| 39 | 305.231 nm | 1% $S_1$ , 7% $T_6$ , 90% $T_8$               | $3.3 \times 10^{-4}$ |
| 40 | 303.975 nm | 89% $S_1$ , 1% $T_5$ , 2% $T_8$ , 2% $T_{18}$ | 0.0268               |
| 41 | 302.831 nm | 72% $S_2$ , 25% $T_8$                         | 0.0177               |
| 42 | 298.626 nm | 3% $S_3$ , 95% $T_{24}$                       | $1.9 \times 10^{-4}$ |
| 43 | 298.398 nm | 96% $T_{24}$                                  | $5.4 \times 10^{-5}$ |
| 44 | 298.038 nm | 3% $S_1$ , 1% $T_{18}$ , 95% $T_{24}$         | 0.0020               |
| 45 | 290.237 nm | 95% $S_3$ , 3% $T_{24}$                       | 0.0033               |
| 46 | 286.235 nm | 2% $T_{46}$ , 93% $T_{47}$                    | $5.4 \times 10^{-6}$ |
| 47 | 286.204 nm | 4% $T_{46}$ , 95% $T_{47}$                    | $3.4 \times 10^{-5}$ |
| 48 | 285.923 nm | 7% $T_9$ , 91% $T_{47}$                       | $2.8 \times 10^{-7}$ |
| 49 | 285.577 nm | 65% $T_9$ , 31% $T_{15}$ , 3% $T_{47}$        | $3.7 \times 10^{-5}$ |
| 50 | 285.567 nm | 54% $T_9$ , 37% $T_{15}$ , 8% $T_{47}$        | $1.4 \times 10^{-6}$ |

Table S6 SOC-free states of  $[\text{Ir}(\text{tpy})_2]^{3+}\cdot\text{Cl}^-$

| State    | Wavelength | Composition                                                                                                                                                                                                                                                                                                                                                                          |
|----------|------------|--------------------------------------------------------------------------------------------------------------------------------------------------------------------------------------------------------------------------------------------------------------------------------------------------------------------------------------------------------------------------------------|
| $S_1$    | 305.156 nm | HOMO-10 $\rightarrow$ LUMO+2 2%, HOMO-5 $\rightarrow$ LUMO 13%, HOMO-4 $\rightarrow$ LUMO 50%, HOMO-2 $\rightarrow$ LUMO 26%                                                                                                                                                                                                                                                         |
| $S_2$    | 304.660 nm | HOMO-9 $\rightarrow$ LUMO+1 2%, HOMO-6 $\rightarrow$ HOMO 1%, HOMO-5 $\rightarrow$ HOMO 16%, HOMO-4 $\rightarrow$ HOMO 66%, HOMO-2 $\rightarrow$ HOMO 7%                                                                                                                                                                                                                             |
| $S_3$    | 291.368 nm | HOMO-8 $\rightarrow$ HOMO 1%, HOMO-7 $\rightarrow$ LUMO 12%, HOMO-5 $\rightarrow$ LUMO+2 1%, HOMO-4 $\rightarrow$ LUMO+2 1%, HOMO-2 $\rightarrow$ LUMO+2 2%, HOMO-1 $\rightarrow$ LUMO 69%, HOMO-1 $\rightarrow$ LUMO+4 3%, HOMO-1 $\rightarrow$ LUMO+8 4%                                                                                                                           |
| $S_4$    | 267.834 nm | HOMO-12 $\rightarrow$ LUMO+2 1%, HOMO-6 $\rightarrow$ LUMO 27%, HOMO-5 $\rightarrow$ LUMO 8%, HOMO-4 $\rightarrow$ LUMO 25%, HOMO-4 $\rightarrow$ LUMO+4 1%, HOMO-2 $\rightarrow$ LUMO 20%, HOMO-2 $\rightarrow$ LUMO+8 1%, HOMO-1 $\rightarrow$ LUMO+1 2%, HOMO-1 $\rightarrow$ LUMO+2 5%                                                                                           |
| $S_5$    | 275.305 nm | HOMO-8 $\rightarrow$ HOMO 4%, HOMO-7 $\rightarrow$ LUMO 24%, HOMO-6 $\rightarrow$ HOMO 2%, HOMO-6 $\rightarrow$ LUMO+1 2%, HOMO-5 $\rightarrow$ HOMO 1%, HOMO-5 $\rightarrow$ LUMO+2 3%, HOMO-3 $\rightarrow$ LUMO 40%, HOMO-3 $\rightarrow$ LUMO+4 1%, HOMO-3 $\rightarrow$ LUMO+8 2%, HOMO-2 $\rightarrow$ LUMO+1 2%, HOMO-2 $\rightarrow$ LUMO+2 4%, HOMO-1 $\rightarrow$ LUMO 8% |
| $S_6$    | 262.351 nm | HOMO-13 $\rightarrow$ LUMO+1 2%, HOMO-9 $\rightarrow$ LUMO+1 1%, HOMO-9 $\rightarrow$ LUMO+3 1%, HOMO-8 $\rightarrow$ HOMO 20%, HOMO-6 $\rightarrow$ HOMO 27%, HOMO-5 $\rightarrow$ HOMO 24%, HOMO-5 $\rightarrow$ LUMO+1 2%, HOMO-4 $\rightarrow$ HOMO 3%, HOMO-4 $\rightarrow$ LUMO+1 3%, HOMO-4 $\rightarrow$ LUMO+2 2%                                                           |
| $S_7$    | 260.739 nm | HOMO-8 $\rightarrow$ HOMO 31%, HOMO-7 $\rightarrow$ LUMO 4%, HOMO-6 $\rightarrow$ HOMO 15%, HOMO-6 $\rightarrow$ LUMO+1 2%, HOMO-5 $\rightarrow$ HOMO 6%, HOMO-5 $\rightarrow$ LUMO+1 9%, HOMO-4 $\rightarrow$ HOMO 2%, HOMO-4 $\rightarrow$ LUMO+1 2%, HOMO-4 $\rightarrow$ LUMO+2 7%, HOMO-4 $\rightarrow$ LUMO+6 2%, HOMO-2 $\rightarrow$ LUMO+2 7%                               |
| $S_8$    | 279.324 nm | HOMO-8 $\rightarrow$ HOMO 1%, HOMO-7 $\rightarrow$ LUMO 15%, HOMO-5 $\rightarrow$ LUMO+2 2%, HOMO-3 $\rightarrow$ LUMO 50%, HOMO-3 $\rightarrow$ LUMO+4 2%, HOMO-3 $\rightarrow$ LUMO+8 2%, HOMO-2 $\rightarrow$ LUMO+1 2%, HOMO-2 $\rightarrow$ LUMO+2 3%, HOMO-1 $\rightarrow$ LUMO 12%                                                                                            |
| $S_9$    | 275.855 nm | HOMO-7 $\rightarrow$ HOMO 7%, HOMO-7 $\rightarrow$ LUMO+1 1%, HOMO-7 $\rightarrow$ LUMO+2 4%, HOMO-4 $\rightarrow$ LUMO+4 1%, HOMO-2 $\rightarrow$ LUMO 8%, HOMO-1 $\rightarrow$ LUMO+1 22%, HOMO-1 $\rightarrow$ LUMO+2 45%, HOMO-1 $\rightarrow$ LUMO+11 2%                                                                                                                        |
| $S_{10}$ | 257.461 nm | HOMO-19 $\rightarrow$ HOMO 2%, HOMO-16 $\rightarrow$ HOMO 3%, HOMO-10 $\rightarrow$ HOMO 4%, HOMO-8 $\rightarrow$ LUMO 1%, HOMO-7 $\rightarrow$ HOMO 69%, HOMO-3 $\rightarrow$ HOMO 3%, HOMO-2 $\rightarrow$ LUMO 2%, HOMO-1 $\rightarrow$ HOMO 5%, HOMO-1 $\rightarrow$ LUMO+1 3%, HOMO-1 $\rightarrow$ LUMO+2 3%                                                                   |
| $S_{11}$ | 266.613 nm | HOMO-10 $\rightarrow$ LUMO+2 1%, HOMO-10 $\rightarrow$ LUMO+3 1%, HOMO-7 $\rightarrow$ LUMO+2 2%, HOMO-6 $\rightarrow$ LUMO 19%, HOMO-5 $\rightarrow$ LUMO 19%, HOMO-4 $\rightarrow$ LUMO 5%,                                                                                                                                                                                        |

|                 |            |                                                                                                                                                                                                                                                                                                           |
|-----------------|------------|-----------------------------------------------------------------------------------------------------------------------------------------------------------------------------------------------------------------------------------------------------------------------------------------------------------|
|                 |            | HOMO-4→LUMO+4 1%, HOMO-2→LUMO 32%, HOMO-2→LUMO+4 5%,<br>HOMO-2→LUMO+8 2%                                                                                                                                                                                                                                  |
| S <sub>12</sub> | 249.640 nm | HOMO-13→HOMO 2%, HOMO-12→LUMO 1%, HOMO-7→LUMO 2%,<br>HOMO-6→LUMO+1 11%, HOMO-6→LUMO+3 2%, HOMO-5→LUMO+6 2%,<br>HOMO-4→LUMO+1 45%, HOMO-2→LUMO+1 16%, HOMO-2→LUMO+2 5%                                                                                                                                     |
| S <sub>13</sub> | 250.498 nm | HOMO-20→LUMO 3%, HOMO-17→LUMO 3%, HOMO-9→LUMO 7%,<br>HOMO-8→LUMO 82%                                                                                                                                                                                                                                      |
| S <sub>14</sub> | 274.201 nm | HOMO-7→LUMO+1 2%, HOMO-7→LUMO+2 6%, HOMO-3→LUMO+1 30%,<br>HOMO-3→LUMO+2 54%, HOMO-3→LUMO+11 2%                                                                                                                                                                                                            |
| S <sub>15</sub> | 264.868 nm | HOMO-8→LUMO+1 1%, HOMO-7→LUMO 8%, HOMO-6→LUMO+1 2%,<br>HOMO-4→LUMO+1 15%, HOMO-4→LUMO+2 7%, HOMO-2→LUMO+1<br>15%, HOMO-2→LUMO+2 41%, HOMO-2→LUMO+11 1%                                                                                                                                                    |
| S <sub>16</sub> | 241.029 nm | HOMO-15→HOMO 2%, HOMO-14→HOMO 2%, HOMO-8→LUMO+1 46%,<br>HOMO-8→LUMO+2 17%, HOMO-6→LUMO+7 2%, HOMO-5→LUMO+5 3%,<br>HOMO-5→LUMO+7 2%, HOMO-4→LUMO+5 7%, HOMO-2→HOMO 1%,<br>HOMO-2→LUMO+1 2%                                                                                                                 |
| S <sub>17</sub> | 236.975 nm | HOMO-13→HOMO 1%, HOMO-12→LUMO 2%, HOMO-11→LUMO+1 2%,<br>HOMO-10→LUMO 5%, HOMO-10→LUMO+4 3%, HOMO-9→HOMO 4%,<br>HOMO-9→LUMO+5 2%, HOMO-7→LUMO+4 1%, HOMO-6→LUMO+2 19%,<br>HOMO-5→LUMO+3 7%, HOMO-4→LUMO+2 33%, HOMO-4→LUMO+6 4%,<br>HOMO-2→LUMO+6 1%                                                       |
| S <sub>18</sub> | 240.263 nm | HOMO-14→LUMO 2%, HOMO-7→LUMO+1 14%, HOMO-7→LUMO+2 35%,<br>HOMO-6→LUMO+8 1%, HOMO-5→LUMO 3%, HOMO-5→LUMO+4 2%,<br>HOMO-5→LUMO+8 2%, HOMO-4→LUMO+4 5%, HOMO-3→LUMO+1 4%,<br>HOMO-3→LUMO+2 6%, HOMO-2→LUMO 2%, HOMO-2→LUMO+4 1%,<br>HOMO-1→LUMO+1 5%, HOMO-1→LUMO+2 7%                                       |
| S <sub>19</sub> | 275.393 nm | HOMO-7→HOMO 2%, HOMO-3→HOMO 64%, HOMO-3→LUMO+1 12%,<br>HOMO-3→LUMO+2 4%, HOMO-3→LUMO+3 4%, HOMO-3→LUMO+5 5%,<br>HOMO-3→LUMO+6 4%, HOMO-1→HOMO 1%                                                                                                                                                          |
| S <sub>20</sub> | 274.282 nm | HOMO-7→HOMO 6%, HOMO-1→HOMO 66%, HOMO-1→LUMO+1 12%,<br>HOMO-1→LUMO+2 4%, HOMO-1→LUMO+3 3%, HOMO-1→LUMO+5 3%,<br>HOMO-1→LUMO+6 3%                                                                                                                                                                          |
| T <sub>1</sub>  | 369.864 nm | HOMO-9→HOMO 2%, HOMO-9→LUMO+1 2%, HOMO-9→LUMO+7 2%,<br>HOMO-8→HOMO 8%, HOMO-6→LUMO+1 3%, HOMO-5→HOMO 13%,<br>HOMO-5→LUMO+1 13%, HOMO-5→LUMO+2 5%, HOMO-4→HOMO 19%,<br>HOMO-4→LUMO+1 10%, HOMO-4→LUMO+2 3%, HOMO-2→HOMO 3%,<br>HOMO-2→LUMO+1 2%                                                            |
| T <sub>2</sub>  | 368.676 nm | HOMO-14→LUMO+8 1%, HOMO-10→LUMO+1 2%, HOMO-10→LUMO+2<br>4%, HOMO-7→LUMO 2%, HOMO-7→LUMO+2 1%, HOMO-6→LUMO 2%,<br>HOMO-5→LUMO 20%, HOMO-5→LUMO+2 2%, HOMO-4→LUMO 30%,<br>HOMO-4→LUMO+2 1%, HOMO-2→LUMO 18%, HOMO-2→LUMO+2 1%                                                                               |
| T <sub>3</sub>  | 367.098 nm | HOMO-14→LUMO+11 1%, HOMO-10→LUMO 4%, HOMO-10→LUMO+8<br>3%, HOMO-7→LUMO 16%, HOMO-7→LUMO+4 1%, HOMO-6→LUMO+1<br>2%, HOMO-6→LUMO+2 4%, HOMO-5→LUMO 2%, HOMO-5→LUMO+1 6%,<br>HOMO-5→LUMO+2 15%, HOMO-4→LUMO 3%, HOMO-4→LUMO+1 5%,<br>HOMO-4→LUMO+2 9%, HOMO-2→LUMO 2%, HOMO-2→LUMO+1 4%,<br>HOMO-2→LUMO+2 9% |
| T <sub>4</sub>  | 365.027 nm | HOMO-9→HOMO 3%, HOMO-9→LUMO+1 3%, HOMO-9→LUMO+2 1%,<br>HOMO-9→LUMO+7 2%, HOMO-8→HOMO 10%, HOMO-8→LUMO+1 1%,<br>HOMO-6→LUMO+1 2%, HOMO-6→LUMO+2 1%, HOMO-5→HOMO 17%,<br>HOMO-5→LUMO+1 11%, HOMO-5→LUMO+2 3%, HOMO-4→HOMO 22%,<br>HOMO-4→LUMO+1 5%, HOMO-4→LUMO+2 4%, HOMO-2→HOMO 1%                        |
| T <sub>5</sub>  | 315.013 nm | HOMO-16→LUMO 2%, HOMO-12→LUMO+4 2%, HOMO-12→LUMO+8 1%,<br>HOMO-10→LUMO 8%, HOMO-10→LUMO+4 1%, HOMO-7→LUMO 39%,                                                                                                                                                                                            |

|                 |            |                                                                                                                                                                                                                                                                                                                                                                                                                                                                                                                               |
|-----------------|------------|-------------------------------------------------------------------------------------------------------------------------------------------------------------------------------------------------------------------------------------------------------------------------------------------------------------------------------------------------------------------------------------------------------------------------------------------------------------------------------------------------------------------------------|
|                 |            | HOMO-7→LUMO+8 5%, HOMO-5→LUMO+1 1%, HOMO-5→LUMO+2 2%, HOMO-4→LUMO+1 1%, HOMO-4→LUMO+2 6%, HOMO-2→LUMO+2 2%, HOMO-1→LUMO 16%, HOMO-1→LUMO+4 1%, HOMO-1→LUMO+8 2%                                                                                                                                                                                                                                                                                                                                                               |
| T <sub>6</sub>  | 311.754 nm | HOMO-13→LUMO+1 3%, HOMO-13→LUMO+2 1%, HOMO-13→LUMO+3 2%, HOMO-13→LUMO+6 1%, HOMO-11→HOMO 5%, HOMO-11→LUMO+5 1%, HOMO-8→HOMO 2%, HOMO-8→LUMO+1 3%, HOMO-8→LUMO+2 1%, HOMO-6→HOMO 39%, HOMO-6→LUMO+5 2%, HOMO-5→HOMO 10%, HOMO-4→HOMO 12%, HOMO-4→LUMO+1 1%, HOMO-4→LUMO+5 1%                                                                                                                                                                                                                                                   |
| T <sub>7</sub>  | 308.674 nm | HOMO-12→LUMO+1 1%, HOMO-12→LUMO+2 3%, HOMO-12→LUMO+3 3%, HOMO-12→LUMO+6 1%, HOMO-11→LUMO 6%, HOMO-11→LUMO+4 1%, HOMO-7→LUMO+2 3%, HOMO-7→LUMO+3 1%, HOMO-6→LUMO 40%, HOMO-6→LUMO+4 2%, HOMO-5→LUMO 9%, HOMO-4→LUMO 17%, HOMO-4→LUMO+4 1%                                                                                                                                                                                                                                                                                      |
| T <sub>8</sub>  | 306.396 nm | HOMO-17→HOMO 2%, HOMO-13→LUMO+5 2%, HOMO-13→LUMO+7 1%, HOMO-9→HOMO 9%, HOMO-9→LUMO+5 1%, HOMO-8→HOMO 49%, HOMO-8→LUMO+7 4%, HOMO-6→HOMO 2%, HOMO-5→LUMO+1 2%, HOMO-4→HOMO 2%, HOMO-4→LUMO+1 6%, HOMO-4→LUMO+2 2%                                                                                                                                                                                                                                                                                                              |
| T <sub>9</sub>  | 286.239 nm | HOMO-15→LUMO+3 1%, HOMO-14→LUMO+2 1%, HOMO-14→LUMO+3 1%, HOMO-12→LUMO 7%, HOMO-12→LUMO+4 1%, HOMO-11→LUMO+2 1%, HOMO-11→LUMO+3 1%, HOMO-10→LUMO 16%, HOMO-10→LUMO+4 8%, HOMO-7→LUMO 4%, HOMO-7→LUMO+4 8%, HOMO-6→LUMO+2 4%, HOMO-6→LUMO+3 8%, HOMO-6→LUMO+6 5%, HOMO-5→LUMO+3 5%, HOMO-5→LUMO+6 3%, HOMO-4→LUMO+2 2%, HOMO-2→LUMO+3 1%, HOMO-1→LUMO 7%                                                                                                                                                                        |
| T <sub>10</sub> | 283.475 nm | HOMO-15→LUMO+1 2%, HOMO-15→LUMO+2 1%, HOMO-15→LUMO+3 1%, HOMO-14→LUMO+1 2%, HOMO-13→HOMO 5%, HOMO-9→HOMO 26%, HOMO-9→LUMO+5 7%, HOMO-8→LUMO+5 10%, HOMO-8→LUMO+7 2%, HOMO-6→LUMO+1 1%, HOMO-6→LUMO+2 2%, HOMO-6→LUMO+3 6%, HOMO-6→LUMO+6 5%, HOMO-5→LUMO+3 6%, HOMO-5→LUMO+6 6%, HOMO-4→LUMO+1 1%, HOMO-4→LUMO+3 1%                                                                                                                                                                                                           |
| T <sub>11</sub> | 280.251 nm | HOMO-15→LUMO+1 1%, HOMO-15→LUMO+2 2%, HOMO-14→LUMO+1 1%, HOMO-14→LUMO+2 5%, HOMO-12→LUMO 14%, HOMO-12→LUMO+4 2%, HOMO-11→LUMO+2 3%, HOMO-11→LUMO+3 2%, HOMO-11→LUMO+6 1%, HOMO-10→LUMO 8%, HOMO-10→LUMO+4 2%, HOMO-7→LUMO 1%, HOMO-6→LUMO+1 2%, HOMO-6→LUMO+2 8%, HOMO-5→LUMO+1 2%, HOMO-5→LUMO+2 2%, HOMO-5→LUMO+3 3%, HOMO-5→LUMO+11 1%, HOMO-4→LUMO+2 3%, HOMO-4→LUMO+3 6%, HOMO-4→LUMO+6 5%, HOMO-4→LUMO+11 1%, HOMO-2→LUMO+1 1%, HOMO-2→LUMO+2 2%, HOMO-2→LUMO+3 2%, HOMO-2→LUMO+6 2%, HOMO-2→LUMO+11 1%, HOMO-1→LUMO 3% |
| T <sub>12</sub> | 278.228 nm | HOMO-15→LUMO+1 2%, HOMO-15→LUMO+2 1%, HOMO-14→LUMO+1 3%, HOMO-13→HOMO 18%, HOMO-13→LUMO+5 2%, HOMO-11→LUMO+1 3%, HOMO-11→LUMO+2 2%, HOMO-11→LUMO+3 2%, HOMO-11→LUMO+6 2%, HOMO-9→HOMO 2%, HOMO-9→LUMO+5 2%, HOMO-8→HOMO 5%, HOMO-6→LUMO+1 11%, HOMO-6→LUMO+2 4%, HOMO-5→LUMO+1 6%, HOMO-5→LUMO+2 2%, HOMO-5→LUMO+3 1%, HOMO-5→LUMO+6 1%, HOMO-5→LUMO+9 1%, HOMO-4→LUMO+3 6%, HOMO-4→LUMO+6 5%, HOMO-4→LUMO+9 1%                                                                                                               |
| T <sub>13</sub> | 278.001 nm | HOMO-15→LUMO 4%, HOMO-14→LUMO 8%, HOMO-14→LUMO+4 1%, HOMO-10→LUMO+2 2%, HOMO-10→LUMO+3 11%, HOMO-10→LUMO+6 7%, HOMO-7→LUMO+3 5%, HOMO-7→LUMO+6 3%, HOMO-6→LUMO+4 9%, HOMO-5→LUMO+4 16%, HOMO-5→LUMO+8 1%, HOMO-4→LUMO 3%, HOMO-4→LUMO+4 7%, HOMO-2→LUMO 3%, HOMO-2→LUMO+4 9%, HOMO-2→LUMO+8 2%                                                                                                                                                                                                                                |

|                 |            |                                                                                                                                                                                                                                                                                                                                                                                                                                                                                                     |
|-----------------|------------|-----------------------------------------------------------------------------------------------------------------------------------------------------------------------------------------------------------------------------------------------------------------------------------------------------------------------------------------------------------------------------------------------------------------------------------------------------------------------------------------------------|
| T <sub>14</sub> | 275.006 nm | HOMO-15→HOMO 6%, HOMO-15→LUMO+5 1%, HOMO-14→HOMO 6%, HOMO-9→LUMO+3 11%, HOMO-9→LUMO+6 8%, HOMO-8→LUMO+3 5%, HOMO-8→LUMO+6 4%, HOMO-6→LUMO+5 10%, HOMO-5→LUMO+5 23%, HOMO-4→LUMO+5 9%, HOMO-4→LUMO+7 1%, HOMO-2→LUMO+5 1%                                                                                                                                                                                                                                                                            |
| T <sub>15</sub> | 285.890 nm | HOMO-19→LUMO+2 2%, HOMO-16→LUMO+2 2%, HOMO-14→LUMO 1%, HOMO-12→LUMO+2 2%, HOMO-7→LUMO+1 10%, HOMO-7→LUMO+2 22%, HOMO-2→LUMO 3%, HOMO-1→LUMO+1 14%, HOMO-1→LUMO+2 29%, HOMO-1→LUMO+11 2%                                                                                                                                                                                                                                                                                                             |
| T <sub>16</sub> | 273.936 nm | HOMO-15→LUMO 3%, HOMO-15→LUMO+4 2%, HOMO-14→LUMO 5%, HOMO-14→LUMO+4 2%, HOMO-10→LUMO+1 7%, HOMO-10→LUMO+2 12%, HOMO-10→LUMO+3 2%, HOMO-10→LUMO+6 2%, HOMO-10→LUMO+11 1%, HOMO-7→LUMO+3 1%, HOMO-7→LUMO+11 1%, HOMO-6→LUMO 2%, HOMO-6→LUMO+4 4%, HOMO-6→LUMO+8 4%, HOMO-5→LUMO+4 2%, HOMO-5→LUMO+8 8%, HOMO-4→LUMO 1%, HOMO-4→LUMO+8 3%, HOMO-2→LUMO 9%, HOMO-2→LUMO+8 6%, HOMO-1→LUMO+1 3%, HOMO-1→LUMO+2 6%                                                                                        |
| T <sub>17</sub> | 272.498 nm | HOMO-15→HOMO 8%, HOMO-15→LUMO+5 2%, HOMO-14→HOMO 7%, HOMO-14→LUMO+5 1%, HOMO-13→LUMO+3 1%, HOMO-11→LUMO+5 1%, HOMO-9→LUMO+1 12%, HOMO-9→LUMO+2 3%, HOMO-9→LUMO+6 1%, HOMO-9→LUMO+9 3%, HOMO-8→LUMO+1 9%, HOMO-8→LUMO+2 2%, HOMO-8→LUMO+6 1%, HOMO-6→LUMO+5 3%, HOMO-6→LUMO+7 5%, HOMO-5→HOMO 2%, HOMO-5→LUMO+7 14%, HOMO-4→HOMO 5%, HOMO-4→LUMO+7 6%                                                                                                                                                |
| T <sub>18</sub> | 311.136 nm | HOMO-10→LUMO+4 4%, HOMO-7→LUMO 10%, HOMO-7→LUMO+4 4%, HOMO-6→LUMO+3 2%, HOMO-3→LUMO 28%, HOMO-3→LUMO+4 1%, HOMO-3→LUMO+8 1%, HOMO-2→LUMO+2 1%, HOMO-1→LUMO 28%, HOMO-1→LUMO+4 2%, HOMO-1→LUMO+8 2%                                                                                                                                                                                                                                                                                                  |
| T <sub>19</sub> | 263.078 nm | HOMO-15→LUMO+1 1%, HOMO-15→LUMO+2 3%, HOMO-15→LUMO+6 1%, HOMO-14→LUMO+1 6%, HOMO-13→LUMO+5 1%, HOMO-12→LUMO 1%, HOMO-11→LUMO+2 1%, HOMO-10→LUMO 3%, HOMO-10→LUMO+4 3%, HOMO-9→HOMO 4%, HOMO-9→LUMO+5 7%, HOMO-9→LUMO+7 2%, HOMO-8→HOMO 1%, HOMO-8→LUMO+5 4%, HOMO-8→LUMO+7 2%, HOMO-7→LUMO+8 1%, HOMO-6→LUMO+1 6%, HOMO-6→LUMO+3 3%, HOMO-6→LUMO+11 2%, HOMO-5→LUMO+6 3%, HOMO-5→LUMO+9 5%, HOMO-4→LUMO+1 6%, HOMO-4→LUMO+3 1%, HOMO-3→LUMO 6%, HOMO-1→LUMO 3%                                      |
| T <sub>20</sub> | 262.544 nm | HOMO-15→LUMO+1 6%, HOMO-14→LUMO+2 6%, HOMO-14→LUMO+6 1%, HOMO-12→LUMO 1%, HOMO-11→LUMO+1 1%, HOMO-10→LUMO 6%, HOMO-10→LUMO+4 7%, HOMO-10→LUMO+8 2%, HOMO-9→HOMO 2%, HOMO-9→LUMO+5 4%, HOMO-9→LUMO+7 2%, HOMO-8→LUMO+5 2%, HOMO-8→LUMO+7 1%, HOMO-7→LUMO+4 2%, HOMO-7→LUMO+8 2%, HOMO-6→LUMO+2 2%, HOMO-6→LUMO+6 3%, HOMO-6→LUMO+9 3%, HOMO-5→LUMO+3 5%, HOMO-5→LUMO+11 5%, HOMO-4→LUMO+1 1%, HOMO-4→LUMO+2 4%, HOMO-4→LUMO+6 1%, HOMO-4→LUMO+9 1%, HOMO-3→LUMO 7%, HOMO-2→LUMO+2 5%, HOMO-1→LUMO 2% |

Table S7 SOC states of  $[\text{Ir}(\text{tpy})_2]^{3+}\cdot\text{Br}^-$ 

| State | Wavelength | Composition                                                                                                                                  | $f$                 |
|-------|------------|----------------------------------------------------------------------------------------------------------------------------------------------|---------------------|
| 1     | 448.970 nm | 2% $S_3$ , 93% $T_5$ , 2% $T_6$                                                                                                              | $1.5\times 10^{-4}$ |
| 2     | 448.221 nm | 93% $T_5$ , 5% $T_6$                                                                                                                         | $7.1\times 10^{-7}$ |
| 3     | 447.169 nm | 1% $S_2$ , 96% $T_5$                                                                                                                         | $1.0\times 10^{-4}$ |
| 4     | 401.552 nm | 17% $S_1$ , 80% $T_6$                                                                                                                        | 0.0033              |
| 5     | 399.524 nm | 1% $S_1$ , 2% $S_2$ , 20% $S_3$ , 73% $T_6$                                                                                                  | 0.0022              |
| 6     | 395.421 nm | 2% $T_1$ , 2% $T_5$ , 86% $T_6$ , 5% $T_7$                                                                                                   | $3.7\times 10^{-6}$ |
| 7     | 381.964 nm | 16% $S_1$ , 45% $T_1$ , 8% $T_2$ , 20% $S_3$ , 5% $T_6$ , 4% $T_7$                                                                           | 0.0012              |
| 8     | 379.600 nm | 8% $S_1$ , 75% $T_1$ , 4% $S_2$ , 1% $T_2$ , 4% $T_6$ , 2% $T_{20}$                                                                          | 0.0015              |
| 9     | 378.387 nm | 91% $T_1$ , 1% $T_7$ , 4% $T_{20}$                                                                                                           | $1.9\times 10^{-5}$ |
| 10    | 377.598 nm | 30% $S_1$ , 47% $T_1$ , 6% $T_2$ , 5% $T_6$ , 6% $T_7$ , 1% $T_{20}$                                                                         | 0.0057              |
| 11    | 375.498 nm | 1% $S_1$ , 6% $T_3$ , 4% $S_{11}$ , 86% $T_{20}$                                                                                             | $2.9\times 10^{-4}$ |
| 12    | 374.726 nm | 2% $S_1$ , 10% $T_1$ , 4% $S_2$ , 24% $T_2$ , 8% $S_3$ , 4% $T_3$ , 2% $T_6$ , 42% $T_{20}$                                                  | $7.2\times 10^{-4}$ |
| 13    | 374.228 nm | 9% $T_1$ , 10% $T_2$ , 2% $S_3$ , 5% $T_3$ , 69% $T_{20}$                                                                                    | $1.8\times 10^{-4}$ |
| 14    | 373.977 nm | 2% $S_1$ , 4% $T_1$ , 1% $S_2$ , 19% $T_2$ , 3% $S_3$ , 63% $T_{20}$                                                                         | 0.0022              |
| 15    | 371.971 nm | 3% $S_1$ , 90% $T_2$                                                                                                                         | 0.0014              |
| 16    | 371.814 nm | 7% $S_1$ , 1% $S_2$ , 85% $T_2$ , 1% $T_6$                                                                                                   | 0.0025              |
| 17    | 369.807 nm | 2% $T_2$ , 95% $T_3$                                                                                                                         | $5.9\times 10^{-5}$ |
| 18    | 369.520 nm | 3% $T_2$ , 1% $S_3$ , 86% $T_3$ , 4% $T_{20}$                                                                                                | $6.4\times 10^{-5}$ |
| 19    | 369.184 nm | 1% $S_2$ , 2% $T_2$ , 1% $S_3$ , 83% $T_3$ , 9% $T_{20}$                                                                                     | $7.4\times 10^{-5}$ |
| 20    | 368.692 nm | 3% $T_1$ , 12% $S_2$ , 32% $T_2$ , 16% $S_3$ , 16% $T_3$ , 1% $T_6$ , 12% $T_7$ , 2% $T_{20}$                                                | $8.3\times 10^{-4}$ |
| 21    | 364.962 nm | 100% $T_4$                                                                                                                                   | $2.5\times 10^{-5}$ |
| 22    | 364.954 nm | 99% $T_4$                                                                                                                                    | $2.8\times 10^{-6}$ |
| 23    | 364.942 nm | 99% $T_4$                                                                                                                                    | $6.3\times 10^{-6}$ |
| 24    | 359.626 nm | 2% $S_1$ , 3% $T_1$ , 46% $S_2$ , 6% $T_2$ , 17% $S_3$ , 3% $T_5$ , 11% $T_6$ , 8% $T_7$ , 1% $T_{10}$                                       | 0.0110              |
| 25    | 347.221 nm | 5% $T_6$ , 88% $T_7$                                                                                                                         | $5.0\times 10^{-5}$ |
| 26    | 345.691 nm | 6% $S_1$ , 2% $S_3$ , 4% $T_6$ , 80% $T_7$ , 2% $T_{10}$                                                                                     | 0.0011              |
| 27    | 344.398 nm | 14% $S_2$ , 2% $S_3$ , 70% $T_7$ , 5% $T_{10}$                                                                                               | $2.8\times 10^{-4}$ |
| 28    | 333.050 nm | 1% $T_8$ , 5% $S_9$ , 73% $S_{11}$ , 2% $T_{12}$ , 3% $T_{20}$ , 4% $T_{21}$ , 1% $T_{23}$                                                   | 0.0046              |
| 29    | 330.924 nm | 66% $S_9$ , 3% $T_{10}$ , 7% $S_{11}$ , 11% $T_{12}$                                                                                         | 0.0011              |
| 30    | 330.610 nm | 49% $T_{35}$ , 45% $T_{39}$ , 2% $T_{44}$                                                                                                    | $1.6\times 10^{-4}$ |
| 31    | 330.503 nm | 52% $T_{35}$ , 45% $T_{39}$                                                                                                                  | $3.4\times 10^{-5}$ |
| 32    | 327.959 nm | 4% $S_7$ , 17% $S_8$ , 52% $T_{10}$ , 3% $T_{11}$ , 15% $T_{12}$ , 2% $T_{21}$                                                               | 0.0023              |
| 33    | 326.394 nm | 2% $S_1$ , 4% $S_8$ , 5% $S_9$ , 69% $T_{10}$ , 6% $T_{11}$ , 1% $T_{12}$                                                                    | $1.7\times 10^{-4}$ |
| 34    | 326.093 nm | 3% $S_2$ , 3% $S_5$ , 4% $S_8$ , 74% $T_{10}$ , 9% $T_{12}$                                                                                  | 0.0051              |
| 35    | 324.982 nm | 1% $S_2$ , 2% $S_6$ , 23% $S_7$ , 10% $S_8$ , 2% $S_{10}$ , 27% $T_{10}$ , 4% $T_{11}$ , 5% $T_{12}$ , 16% $T_{21}$ , 2% $T_{35}$            | 0.0024              |
| 36    | 324.320 nm | 2% $S_8$ , 92% $T_{35}$                                                                                                                      | $9.3\times 10^{-5}$ |
| 37    | 323.665 nm | 1% $S_6$ , 5% $S_7$ , 11% $S_8$ , 2% $T_8$ , 2% $S_9$ , 14% $S_{10}$ , 5% $T_{10}$ , 28% $T_{12}$ , 14% $T_{21}$ , 1% $T_{23}$ , 8% $T_{39}$ | 0.0031              |
| 38    | 323.328 nm | 7% $S_7$ , 35% $T_{12}$ , 17% $T_{21}$ , 34% $T_{39}$                                                                                        | 0.0068              |
| 39    | 322.929 nm | 2% $S_8$ , 4% $S_{10}$ , 5% $T_{10}$ , 24% $T_{12}$ , 8% $T_{21}$ , 47% $T_{39}$                                                             | 0.0011              |
| 40    | 322.660 nm | 7% $S_7$ , 2% $S_8$ , 3% $S_{10}$ , 10% $T_{10}$ , 31% $T_{12}$ , 34% $T_{21}$ , 2% $T_{39}$                                                 | 0.0025              |

|    |            |                                                                                                                                        |                      |
|----|------------|----------------------------------------------------------------------------------------------------------------------------------------|----------------------|
| 41 | 321.369 nm | 2% $S_5$ , 24% $S_6$ , 1% $S_8$ , 2% $T_8$ , 14% $S_{10}$ , 3% $T_{10}$ , 11% $T_{12}$ , 35% $T_{21}$                                  | 0.0244               |
| 42 | 319.891 nm | 6% $S_6$ , 23% $S_7$ , 17% $S_8$ , 1% $S_9$ , 6% $S_{10}$ , 15% $T_{12}$ , 5% $T_{16}$ , 10% $T_{21}$ , 7% $T_{23}$ , 1% $T_{25}$      | 0.0507               |
| 43 | 318.543 nm | 3% $S_7$ , 3% $S_8$ , 2% $T_8$ , 2% $S_9$ , 20% $S_{10}$ , 34% $T_{12}$ , 21% $T_{16}$ , 2% $T_{21}$                                   | 0.0091               |
| 44 | 318.117 nm | 3% $T_{21}$ , 1% $S_{23}$ , 36% $T_{35}$ , 28% $T_{39}$ , 23% $T_{44}$                                                                 | $8.1 \times 10^{-4}$ |
| 45 | 317.589 nm | 1% $S_6$ , 36% $T_{35}$ , 36% $T_{39}$ , 17% $T_{44}$                                                                                  | $3.3 \times 10^{-4}$ |
| 46 | 317.047 nm | 4% $S_7$ , 2% $T_8$ , 5% $S_{10}$ , 14% $T_{12}$ , 19% $T_{16}$ , 39% $T_{21}$ , 2% $T_{23}$ , 2% $T_{35}$ , 2% $T_{39}$ , 1% $T_{44}$ | 0.0123               |
| 47 | 316.245 nm | 6% $S_6$ , 70% $T_8$ , 1% $T_9$ , 5% $T_{16}$ , 7% $T_{21}$ , 1% $T_{23}$                                                              | 0.0017               |
| 48 | 316.001 nm | 2% $S_5$ , 11% $S_6$ , 64% $T_8$ , 9% $T_{16}$ , 5% $T_{21}$ , 4% $T_{23}$                                                             | 0.0024               |
| 49 | 315.607 nm | 2% $S_5$ , 8% $S_6$ , 62% $T_8$ , 2% $S_{10}$ , 9% $T_{16}$ , 4% $T_{21}$ , 5% $T_{23}$                                                | 0.0024               |
| 50 | 314.500 nm | 5% $S_6$ , 65% $T_8$ , 3% $S_{11}$ , 10% $T_{16}$ , 8% $T_{21}$                                                                        | $6.4 \times 10^{-4}$ |

Table S8 SOC-free states of  $[\text{Ir}(\text{tpy})_2]^{3+}\cdot\text{Br}^-$

| State           | Wavelength | Composition                                                                                                                                                                                                                 |
|-----------------|------------|-----------------------------------------------------------------------------------------------------------------------------------------------------------------------------------------------------------------------------|
| S <sub>1</sub>  | 377.622 nm | HOMO-5→LUMO 1%, HOMO-4→LUMO 5%, HOMO-1→LUMO 62%, HOMO-1→LUMO+1 10%, HOMO-1→LUMO+2 16%                                                                                                                                       |
| S <sub>2</sub>  | 360.429 nm | HOMO-5→LUMO 1%, HOMO-4→LUMO 10%, HOMO-3→LUMO 12%, HOMO-3→LUMO+1 2%, HOMO-3→LUMO+2 3%, HOMO-2→LUMO 48%, HOMO-2→LUMO+1 7%, HOMO-2→LUMO+2 9%, HOMO-1→LUMO+1 2%, HOMO-1→LUMO+2 3%                                               |
| S <sub>3</sub>  | 377.380 nm | HOMO-3→LUMO 50%, HOMO-3→LUMO+1 8%, HOMO-3→LUMO+2 14%, HOMO-2→LUMO 17%, HOMO-2→LUMO+1 3%, HOMO-2→LUMO+2 3%                                                                                                                   |
| S <sub>4</sub>  | 304.483 nm | HOMO-10→LUMO+1 2%, HOMO-5→HOMO 18%, HOMO-4→HOMO 70%, HOMO-4→LUMO 1%                                                                                                                                                         |
| S <sub>5</sub>  | 309.622 nm | HOMO-5→LUMO 6%, HOMO-4→HOMO 2%, HOMO-4→LUMO 38%, HOMO-3→LUMO 3%, HOMO-3→LUMO+1 2%, HOMO-3→LUMO+2 3%, HOMO-2→LUMO 5%, HOMO-2→LUMO+1 3%, HOMO-2→LUMO+2 3%, HOMO-1→LUMO 2%, HOMO-1→LUMO+1 10%, HOMO-1→LUMO+2 17%               |
| S <sub>6</sub>  | 313.255 nm | HOMO-6→LUMO 2%, HOMO-5→LUMO 2%, HOMO-4→LUMO 24%, HOMO-2→HOMO 3%, HOMO-2→LUMO+2 3%, HOMO-1→LUMO 24%, HOMO-1→LUMO+1 12%, HOMO-1→LUMO+2 19%, HOMO-1→LUMO+8 2%                                                                  |
| S <sub>7</sub>  | 318.739 nm | HOMO-8→HOMO 2%, HOMO-6→HOMO 4%, HOMO-4→HOMO 2%, HOMO-2→HOMO 41%, HOMO-2→LUMO 6%, HOMO-2→LUMO+1 23%, HOMO-2→LUMO+2 1%, HOMO-2→LUMO+5 2%, HOMO-2→LUMO+6 2%, HOMO-1→HOMO 3%, HOMO-1→LUMO+1 2%                                  |
| S <sub>8</sub>  | 317.761 nm | HOMO-7→LUMO 1%, HOMO-4→LUMO 1%, HOMO-3→LUMO 2%, HOMO-3→LUMO+1 2%, HOMO-3→LUMO+2 2%, HOMO-2→HOMO 6%, HOMO-2→LUMO 16%, HOMO-2→LUMO+1 10%, HOMO-2→LUMO+2 34%, HOMO-2→LUMO+8 2%, HOMO-1→HOMO 9%, HOMO-1→LUMO+1 2%               |
| S <sub>9</sub>  | 325.693 nm | HOMO-3→LUMO 18%, HOMO-3→LUMO+1 17%, HOMO-3→LUMO+2 23%, HOMO-3→LUMO+8 2%, HOMO-1→HOMO 27%, HOMO-1→LUMO+1 6%, HOMO-1→LUMO+5 1%                                                                                                |
| S <sub>10</sub> | 314.700 nm | HOMO-6→HOMO 2%, HOMO-5→HOMO 2%, HOMO-3→LUMO 7%, HOMO-3→LUMO+1 8%, HOMO-3→LUMO+2 9%, HOMO-2→HOMO 7%, HOMO-2→LUMO 2%, HOMO-2→LUMO+2 7%, HOMO-1→HOMO 33%, HOMO-1→LUMO 3%, HOMO-1→LUMO+1 2%, HOMO-1→LUMO+2 6%, HOMO-1→LUMO+5 2% |
| S <sub>11</sub> | 331.093 nm | HOMO-3→HOMO 68%, HOMO-3→LUMO 2%, HOMO-3→LUMO+1 8%,                                                                                                                                                                          |

|                 |            |                                                                                                                                                                                                                                                                                                                                                              |
|-----------------|------------|--------------------------------------------------------------------------------------------------------------------------------------------------------------------------------------------------------------------------------------------------------------------------------------------------------------------------------------------------------------|
|                 |            | HOMO-3→LUMO+2 10%, HOMO-3→LUMO+4 2%, HOMO-3→LUMO+5 4%,<br>HOMO-3→LUMO+6 2%                                                                                                                                                                                                                                                                                   |
| S <sub>12</sub> | 261.552 nm | HOMO-8→HOMO 37%, HOMO-8→LUMO 2%, HOMO-7→HOMO 10%,<br>HOMO-7→LUMO 6%, HOMO-6→HOMO 8%, HOMO-6→LUMO+1 3%,<br>HOMO-5→HOMO 6%, HOMO-5→LUMO+1 3%, HOMO-5→LUMO+2 4%,<br>HOMO-4→LUMO+1 5%, HOMO-4→LUMO+2 2%, HOMO-4→LUMO+3 2%                                                                                                                                        |
| S <sub>13</sub> | 258.260 nm | HOMO-8→HOMO 2%, HOMO-8→LUMO 2%, HOMO-7→LUMO 23%,<br>HOMO-6→LUMO 20%, HOMO-5→LUMO 14%, HOMO-5→LUMO+1 5%,<br>HOMO-5→LUMO+2 2%, HOMO-4→LUMO 2%, HOMO-4→LUMO+2 9%,<br>HOMO-4→LUMO+5 1%, HOMO-4→LUMO+6 2%                                                                                                                                                         |
| S <sub>14</sub> | 256.653 nm | HOMO-12→LUMO+2 1%, HOMO-9→LUMO+2 1%, HOMO-9→LUMO+3 1%,<br>HOMO-8→LUMO 3%, HOMO-7→LUMO 24%, HOMO-6→HOMO 2%,<br>HOMO-6→LUMO 20%, HOMO-5→LUMO 17%, HOMO-5→LUMO+1 1%,<br>HOMO-5→LUMO+2 1%, HOMO-4→LUMO+2 5%, HOMO-4→LUMO+4 2%,<br>HOMO-1→LUMO 2%                                                                                                                 |
| S <sub>15</sub> | 259.024 nm | HOMO-13→LUMO+1 1%, HOMO-8→HOMO 4%, HOMO-7→HOMO 7%,<br>HOMO-6→HOMO 28%, HOMO-6→LUMO 2%, HOMO-5→HOMO 14%,<br>HOMO-5→LUMO+1 2%, HOMO-4→HOMO 3%, HOMO-4→LUMO+1 6%,<br>HOMO-4→LUMO+2 2%, HOMO-2→HOMO 7%, HOMO-2→LUMO+1 4%,<br>HOMO-2→LUMO+2 3%                                                                                                                    |
| S <sub>16</sub> | 254.939 nm | HOMO-19→HOMO 3%, HOMO-16→HOMO 3%, HOMO-9→HOMO 5%,<br>HOMO-8→HOMO 13%, HOMO-8→LUMO 2%, HOMO-7→HOMO 63%,<br>HOMO-6→HOMO 1%, HOMO-4→LUMO+1 3%                                                                                                                                                                                                                   |
| S <sub>17</sub> | 247.987 nm | HOMO-13→HOMO 1%, HOMO-12→LUMO 1%, HOMO-8→HOMO 5%,<br>HOMO-6→LUMO+1 13%, HOMO-6→LUMO+3 2%, HOMO-5→LUMO+6 2%,<br>HOMO-4→LUMO+1 54%, HOMO-4→LUMO+2 3%, HOMO-2→HOMO 2%                                                                                                                                                                                           |
| S <sub>18</sub> | 249.806 nm | HOMO-20→LUMO 3%, HOMO-17→LUMO 2%, HOMO-10→LUMO 6%,<br>HOMO-8→HOMO 2%, HOMO-8→LUMO 72%, HOMO-7→LUMO 9%                                                                                                                                                                                                                                                        |
| S <sub>19</sub> | 242.403 nm | HOMO-15→HOMO 2%, HOMO-14→HOMO 1%, HOMO-8→LUMO+1 36%,<br>HOMO-8→LUMO+2 14%, HOMO-7→LUMO+1 6%, HOMO-7→LUMO+2 2%,<br>HOMO-6→LUMO+1 1%, HOMO-6→LUMO+7 2%, HOMO-5→LUMO+4 1%,<br>HOMO-5→LUMO+5 1%, HOMO-5→LUMO+7 2%, HOMO-4→LUMO+3 1%,<br>HOMO-4→LUMO+4 3%, HOMO-4→LUMO+5 4%, HOMO-2→HOMO 4%,<br>HOMO-2→LUMO+1 2%, HOMO-2→LUMO+2 2%                                |
| S <sub>20</sub> | 240.105 nm | HOMO-15→LUMO 1%, HOMO-14→LUMO 2%, HOMO-8→LUMO+1 3%,<br>HOMO-8→LUMO+2 5%, HOMO-7→LUMO+1 16%, HOMO-7→LUMO+2<br>37%, HOMO-6→LUMO+8 1%, HOMO-5→LUMO 1%, HOMO-5→LUMO+4<br>2%, HOMO-5→LUMO+8 2%, HOMO-4→LUMO 1%, HOMO-4→LUMO+4 5%,<br>HOMO-4→LUMO+5 3%, HOMO-1→LUMO+4 2%, HOMO-1→LUMO+5 3%,<br>HOMO-1→LUMO+8 1%                                                    |
| T <sub>1</sub>  | 379.383 nm | HOMO-14→LUMO+8 1%, HOMO-9→LUMO+1 1%, HOMO-9→LUMO+2 3%,<br>HOMO-7→LUMO 3%, HOMO-6→LUMO 1%, HOMO-5→LUMO 17%,<br>HOMO-5→LUMO+2 2%, HOMO-4→LUMO 31%, HOMO-4→LUMO+2 2%,<br>HOMO-3→LUMO 1%, HOMO-2→LUMO 2%, HOMO-1→LUMO 18%                                                                                                                                        |
| T <sub>2</sub>  | 373.168 nm | HOMO-14→LUMO+11 1%, HOMO-9→LUMO 3%, HOMO-9→LUMO+8 2%,<br>HOMO-8→LUMO 1%, HOMO-7→LUMO 9%, HOMO-6→LUMO+1 2%,<br>HOMO-6→LUMO+2 3%, HOMO-5→LUMO 2%, HOMO-5→LUMO+1 4%,<br>HOMO-5→LUMO+2 15%, HOMO-4→LUMO 5%, HOMO-4→LUMO+1 8%,<br>HOMO-4→LUMO+2 12%, HOMO-3→LUMO 1%, HOMO-3→LUMO+2 2%,<br>HOMO-2→LUMO+2 1%, HOMO-1→LUMO 1%, HOMO-1→LUMO+1 4%,<br>HOMO-1→LUMO+2 8% |
| T <sub>3</sub>  | 371.005 nm | HOMO-10→HOMO 3%, HOMO-10→LUMO+1 2%, HOMO-10→LUMO+7 2%,<br>HOMO-8→HOMO 9%, HOMO-7→HOMO 1%, HOMO-6→HOMO 1%, HOMO-<br>6→LUMO+1 4%, HOMO-6→LUMO+2 2%, HOMO-5→HOMO 8%, HOMO-                                                                                                                                                                                      |



|                 |            |                                                                                                                                                                                                                                                                                                                                                                                                                                                              |
|-----------------|------------|--------------------------------------------------------------------------------------------------------------------------------------------------------------------------------------------------------------------------------------------------------------------------------------------------------------------------------------------------------------------------------------------------------------------------------------------------------------|
|                 |            | 5→LUMO+1 17%, HOMO-5→LUMO+2 3%, HOMO-4→HOMO 13%, HOMO-4→LUMO+1 10%, HOMO-4→LUMO+2 6%, HOMO-2→HOMO 3%, HOMO-2→LUMO+1 2%                                                                                                                                                                                                                                                                                                                                       |
| T <sub>4</sub>  | 366.274 nm | HOMO-10→HOMO 2%, HOMO-10→LUMO+1 4%, HOMO-10→LUMO+2 1%, HOMO-10→LUMO+7 1%, HOMO-8→HOMO 6%, HOMO-8→LUMO+1 1%, HOMO-7→HOMO 1%, HOMO-6→HOMO 1%, HOMO-6→LUMO+1 2%, HOMO-5→HOMO 22%, HOMO-5→LUMO+1 6%, HOMO-5→LUMO+2 2%, HOMO-4→HOMO 30%, HOMO-4→LUMO+1 4%, HOMO-4→LUMO+2 2%                                                                                                                                                                                       |
| T <sub>5</sub>  | 443.483 nm | HOMO-9→LUMO+2 1%, HOMO-4→LUMO 6%, HOMO-3→LUMO 3%, HOMO-3→LUMO+2 1%, HOMO-2→LUMO 5%, HOMO-2→LUMO+2 1%, HOMO-1→LUMO 41%, HOMO-1→LUMO+1 9%, HOMO-1→LUMO+2 16%                                                                                                                                                                                                                                                                                                   |
| T <sub>6</sub>  | 394.536 nm | HOMO-9→LUMO 1%, HOMO-8→LUMO 2%, HOMO-7→LUMO 11%, HOMO-6→LUMO 2%, HOMO-5→LUMO 3%, HOMO-3→LUMO 2%, HOMO-2→LUMO 47%, HOMO-2→LUMO+1 7%, HOMO-2→LUMO+2 11%, HOMO-1→LUMO+2 1%                                                                                                                                                                                                                                                                                      |
| T <sub>7</sub>  | 350.806 nm | HOMO-12→LUMO+2 2%, HOMO-12→LUMO+3 1%, HOMO-11→LUMO 3%, HOMO-9→LUMO 2%, HOMO-7→LUMO 3%, HOMO-6→LUMO 11%, HOMO-4→LUMO 15%, HOMO-3→LUMO 32%, HOMO-3→LUMO+1 5%, HOMO-3→LUMO+2 8%, HOMO-1→LUMO 2%                                                                                                                                                                                                                                                                 |
| T <sub>8</sub>  | 316.201 nm | HOMO-13→LUMO+1 2%, HOMO-13→LUMO+3 2%, HOMO-13→LUMO+6 1%, HOMO-11→HOMO 5%, HOMO-8→LUMO+1 2%, HOMO-6→HOMO 36%, HOMO-6→LUMO+4 1%, HOMO-6→LUMO+5 1%, HOMO-5→HOMO 5%, HOMO-4→HOMO 16%, HOMO-2→HOMO 10%, HOMO-2→LUMO+1 1%                                                                                                                                                                                                                                          |
| T <sub>9</sub>  | 307.341 nm | HOMO-17→HOMO 2%, HOMO-13→LUMO+7 1%, HOMO-10→HOMO 9%, HOMO-8→HOMO 44%, HOMO-8→LUMO+7 4%, HOMO-7→HOMO 7%, HOMO-6→LUMO+6 1%, HOMO-5→LUMO+1 3%, HOMO-4→LUMO+1 7%, HOMO-4→LUMO+2 4%                                                                                                                                                                                                                                                                               |
| T <sub>10</sub> | 327.521 nm | HOMO-12→LUMO+2 1%, HOMO-11→LUMO 2%, HOMO-7→LUMO 6%, HOMO-7→LUMO+2 2%, HOMO-6→LUMO 20%, HOMO-5→LUMO 8%, HOMO-4→LUMO 4%, HOMO-3→LUMO 19%, HOMO-3→LUMO+1 4%, HOMO-3→LUMO+2 6%, HOMO-2→LUMO 3%, HOMO-2→LUMO+1 1%, HOMO-2→LUMO+2 2%, HOMO-1→LUMO+1 2%, HOMO-1→LUMO+2 3%                                                                                                                                                                                           |
| T <sub>11</sub> | 310.645 nm | HOMO-16→LUMO 1%, HOMO-12→LUMO 2%, HOMO-12→LUMO+4 2%, HOMO-12→LUMO+8 1%, HOMO-11→LUMO+2 1%, HOMO-9→LUMO 6%, HOMO-8→LUMO 3%, HOMO-7→LUMO 21%, HOMO-7→LUMO+8 2%, HOMO-6→LUMO+3 1%, HOMO-6→LUMO+6 1%, HOMO-5→LUMO+2 1%, HOMO-4→LUMO+1 4%, HOMO-4→LUMO+2 9%, HOMO-3→LUMO 4%, HOMO-2→LUMO 9%, HOMO-2→LUMO+1 2%, HOMO-2→LUMO+2 2%, HOMO-1→LUMO+1 2%, HOMO-1→LUMO+2 3%                                                                                               |
| T <sub>12</sub> | 319.550 nm | HOMO-15→LUMO 1%, HOMO-14→LUMO 2%, HOMO-14→LUMO+2 1%, HOMO-9→LUMO 6%, HOMO-9→LUMO+2 3%, HOMO-9→LUMO+3 1%, HOMO-8→LUMO 2%, HOMO-7→LUMO 9%, HOMO-6→LUMO 5%, HOMO-5→LUMO 4%, HOMO-5→LUMO+4 1%, HOMO-1→LUMO 15%, HOMO-1→LUMO+1 8%, HOMO-1→LUMO+2 13%, HOMO-1→LUMO+8 3%                                                                                                                                                                                            |
| T <sub>13</sub> | 297.192 nm | HOMO-15→LUMO+1 2%, HOMO-14→LUMO+1 1%, HOMO-13→HOMO 3%, HOMO-10→HOMO 16%, HOMO-10→LUMO+4 2%, HOMO-10→LUMO+5 2%, HOMO-8→LUMO+3 1%, HOMO-8→LUMO+4 2%, HOMO-8→LUMO+5 2%, HOMO-6→HOMO 5%, HOMO-6→LUMO+3 3%, HOMO-6→LUMO+6 3%, HOMO-5→HOMO 2%, HOMO-5→LUMO+3 2%, HOMO-5→LUMO+5 1%, HOMO-5→LUMO+6 3%, HOMO-4→LUMO+1 1%, HOMO-4→LUMO+5 1%, HOMO-2→HOMO 13%, HOMO-2→LUMO+1 3%, HOMO-2→LUMO+2 1%, HOMO-2→LUMO+4 1%, HOMO-2→LUMO+5 4%, HOMO-2→LUMO+6 2%, HOMO-1→HOMO 2% |
| T <sub>14</sub> | 292.399 nm | HOMO-12→LUMO 3%, HOMO-9→LUMO 13%, HOMO-9→LUMO+4 3%,                                                                                                                                                                                                                                                                                                                                                                                                          |

|                 |            |                                                                                                                                                                                                                                                                                                                                                                                                                                                                                                                                                                               |
|-----------------|------------|-------------------------------------------------------------------------------------------------------------------------------------------------------------------------------------------------------------------------------------------------------------------------------------------------------------------------------------------------------------------------------------------------------------------------------------------------------------------------------------------------------------------------------------------------------------------------------|
|                 |            | HOMO-9→LUMO+5 4%, HOMO-9→LUMO+6 1%, HOMO-7→LUMO+4 3%,<br>HOMO-7→LUMO+5 4%, HOMO-6→LUMO+2 1%, HOMO-6→LUMO+3 3%,<br>HOMO-6→LUMO+5 3%, HOMO-6→LUMO+6 4%, HOMO-5→LUMO+2 1%,<br>HOMO-5→LUMO+3 2%, HOMO-5→LUMO+5 5%, HOMO-5→LUMO+6 3%,<br>HOMO-3→LUMO+1 2%, HOMO-3→LUMO+2 3%, HOMO-3→LUMO+5 2%,<br>HOMO-2→LUMO 2%, HOMO-2→LUMO+1 6%, HOMO-2→LUMO+2 8%,<br>HOMO-2→LUMO+5 1%                                                                                                                                                                                                          |
| T <sub>15</sub> | 283.838 nm | HOMO-14→LUMO+1 1%, HOMO-13→HOMO 12%, HOMO-11→LUMO+1<br>2%, HOMO-11→LUMO+3 2%, HOMO-10→LUMO+5 1%, HOMO-<br>10→LUMO+6 1%, HOMO-8→HOMO 2%, HOMO-6→LUMO+1 9%, HOMO-<br>6→LUMO+2 4%, HOMO-5→LUMO+1 2%, HOMO-5→LUMO+6 2%, HOMO-<br>4→LUMO+1 1%, HOMO-4→LUMO+3 3%, HOMO-4→LUMO+5 2%, HOMO-<br>4→LUMO+6 2%, HOMO-2→LUMO 6%, HOMO-2→LUMO+1 9%, HOMO-<br>2→LUMO+2 3%                                                                                                                                                                                                                    |
| T <sub>16</sub> | 305.717 nm | HOMO-15→LUMO+1 1%, HOMO-13→HOMO 6%, HOMO-11→LUMO+1 1%,<br>HOMO-9→LUMO+5 1%, HOMO-8→HOMO 2%, HOMO-6→LUMO+1 2%,<br>HOMO-6→LUMO+2 4%, HOMO-6→LUMO+5 2%, HOMO-5→LUMO+1 4%,<br>HOMO-5→LUMO+3 1%, HOMO-4→LUMO+6 3%, HOMO-3→LUMO 1%,<br>HOMO-3→LUMO+1 2%, HOMO-3→LUMO+2 2%, HOMO-2→HOMO 1%,<br>HOMO-2→LUMO 11%, HOMO-2→LUMO+1 9%, HOMO-2→LUMO+2 17%,<br>HOMO-2→LUMO+8 1%                                                                                                                                                                                                             |
| T <sub>17</sub> | 282.375 nm | HOMO-14→LUMO+4 1%, HOMO-12→LUMO 3%, HOMO-9→LUMO 2%,<br>HOMO-9→LUMO+1 1%, HOMO-9→LUMO+3 4%, HOMO-9→LUMO+4 2%,<br>HOMO-9→LUMO+6 4%, HOMO-7→LUMO+3 3%, HOMO-7→LUMO+4 2%,<br>HOMO-6→LUMO 1%, HOMO-6→LUMO+1 1%, HOMO-6→LUMO+2 1%,<br>HOMO-6→LUMO+3 2%, HOMO-6→LUMO+4 6%, HOMO-5→LUMO+3 5%,<br>HOMO-5→LUMO+4 3%, HOMO-5→LUMO+5 3%, HOMO-4→LUMO 2%,<br>HOMO-4→LUMO+4 4%, HOMO-4→LUMO+5 1%, HOMO-3→LUMO 10%,<br>HOMO-3→LUMO+1 3%, HOMO-3→LUMO+2 4%, HOMO-3→LUMO+8 1%                                                                                                                  |
| T <sub>18</sub> | 278.574 nm | HOMO-15→HOMO 5%, HOMO-14→HOMO 4%, HOMO-10→HOMO 5%,<br>HOMO-10→LUMO+3 9%, HOMO-10→LUMO+4 1%, HOMO-10→LUMO+6<br>4%, HOMO-8→LUMO+3 5%, HOMO-8→LUMO+6 1%, HOMO-6→HOMO<br>1%, HOMO-6→LUMO+3 6%, HOMO-6→LUMO+4 1%, HOMO-6→LUMO+5<br>2%, HOMO-5→LUMO+3 5%, HOMO-5→LUMO+4 8%, HOMO-5→LUMO+5<br>2%, HOMO-4→LUMO+3 4%, HOMO-4→LUMO+4 2%, HOMO-4→LUMO+5<br>3%, HOMO-4→LUMO+7 1%, HOMO-2→HOMO 2%, HOMO-2→LUMO+1<br>3%, HOMO-2→LUMO+5 1%, HOMO-1→HOMO 2%                                                                                                                                   |
| T <sub>19</sub> | 275.876 nm | HOMO-15→HOMO 2%, HOMO-14→HOMO 1%, HOMO-13→HOMO 1%,<br>HOMO-12→LUMO 6%, HOMO-11→LUMO+2 2%, HOMO-11→LUMO+6 1%,<br>HOMO-10→LUMO+1 3%, HOMO-10→LUMO+6 1%, HOMO-9→LUMO+4<br>2%, HOMO-8→LUMO+1 2%, HOMO-6→LUMO+1 4%, HOMO-6→LUMO+2<br>2%, HOMO-6→LUMO+5 3%, HOMO-6→LUMO+6 1%, HOMO-6→LUMO+7<br>2%, HOMO-5→HOMO 1%, HOMO-5→LUMO+2 4%, HOMO-5→LUMO+3<br>1%, HOMO-5→LUMO+4 1%, HOMO-5→LUMO+5 1%, HOMO-5→LUMO+7<br>4%, HOMO-4→HOMO 2%, HOMO-4→LUMO+3 3%, HOMO-4→LUMO+6<br>2%, HOMO-4→LUMO+7 2%, HOMO-2→HOMO 1%, HOMO-2→LUMO+2<br>3%, HOMO-2→LUMO+5 1%, HOMO-1→HOMO 3%, HOMO-1→LUMO+1 3% |
| T <sub>20</sub> | 372.032 nm | HOMO-15→HOMO 2%, HOMO-14→HOMO 2%, HOMO-10→LUMO+1 2%,<br>HOMO-5→LUMO+7 2%, HOMO-4→LUMO+7 2%, HOMO-2→LUMO+2 2%,<br>HOMO-1→HOMO 56%, HOMO-1→LUMO+1 9%, HOMO-1→LUMO+2 3%,<br>HOMO-1→LUMO+4 1%, HOMO-1→LUMO+5 3%, HOMO-1→LUMO+6 2%                                                                                                                                                                                                                                                                                                                                                 |



Table S9 SOC orbit states of  $[\text{Ir}(\text{tpy})_2]^{3+}\cdot\text{I}^-$ 

| State | Wavelength | Composition                                                                                                                                                                    | $f$                  |
|-------|------------|--------------------------------------------------------------------------------------------------------------------------------------------------------------------------------|----------------------|
| 1     | 484.118 nm | 52%T <sub>18</sub> , 48%T <sub>23</sub>                                                                                                                                        | 2.6×10 <sup>-6</sup> |
| 2     | 484.102 nm | 52%T <sub>18</sub> , 48%T <sub>23</sub>                                                                                                                                        | 3.8×10 <sup>-5</sup> |
| 3     | 458.299 nm | 3%S <sub>10</sub> , 94%T <sub>18</sub>                                                                                                                                         | 1.4×10 <sup>-7</sup> |
| 4     | 456.392 nm | 4%S <sub>9</sub> , 94%T <sub>23</sub>                                                                                                                                          | 7.0×10 <sup>-7</sup> |
| 5     | 446.329 nm | 30%T <sub>9</sub> , 68%T <sub>15</sub>                                                                                                                                         | 5.0×10 <sup>-5</sup> |
| 6     | 446.158 nm | 32%T <sub>9</sub> , 67%T <sub>15</sub>                                                                                                                                         | 8.3×10 <sup>-7</sup> |
| 7     | 435.662 nm | 6%S <sub>5</sub> , 90%T <sub>15</sub>                                                                                                                                          | 1.1×10 <sup>-5</sup> |
| 8     | 424.355 nm | 45%T <sub>18</sub> , 48%T <sub>23</sub> , 2%T <sub>26</sub>                                                                                                                    | 7.4×10 <sup>-5</sup> |
| 9     | 423.399 nm | 3%S <sub>11</sub> , 46%T <sub>18</sub> , 49%T <sub>23</sub>                                                                                                                    | 9.5×10 <sup>-4</sup> |
| 10    | 417.289 nm | 32%T <sub>5</sub> , 3%S <sub>8</sub> , 60%T <sub>9</sub>                                                                                                                       | 3.1×10 <sup>-6</sup> |
| 11    | 416.219 nm | 2%S <sub>1</sub> , 3%S <sub>4</sub> , 86%T <sub>5</sub> , 3%T <sub>11</sub>                                                                                                    | 3.5×10 <sup>-4</sup> |
| 12    | 414.209 nm | 1%S <sub>2</sub> , 2%S <sub>5</sub> , 90%T <sub>5</sub> , 1%T <sub>9</sub>                                                                                                     | 2.2×10 <sup>-4</sup> |
| 13    | 414.002 nm | 59%T <sub>5</sub> , 2%S <sub>8</sub> , 30%T <sub>9</sub> , 2%T <sub>11</sub>                                                                                                   | 4.4×10 <sup>-5</sup> |
| 14    | 403.047 nm | 6%S <sub>1</sub> , 16%S <sub>7</sub> , 54%T <sub>9</sub> , 20%T <sub>15</sub>                                                                                                  | 0.0024               |
| 15    | 399.241 nm | 74%S <sub>1</sub> , 1%S <sub>7</sub> , 5%T <sub>9</sub> , 9%T <sub>11</sub>                                                                                                    | 9.4×10 <sup>-4</sup> |
| 16    | 397.704 nm | 2%T <sub>5</sub> , 59%T <sub>9</sub> , 7%T <sub>13</sub> , 25%T <sub>15</sub>                                                                                                  | 3.2×10 <sup>-5</sup> |
| 17    | 374.004 nm | 25%T <sub>35</sub> , 73%T <sub>36</sub>                                                                                                                                        | 2.7×10 <sup>-6</sup> |
| 18    | 373.850 nm | 26%T <sub>35</sub> , 72%T <sub>36</sub>                                                                                                                                        | 2.5×10 <sup>-5</sup> |
| 19    | 370.364 nm | 81%T <sub>1</sub> , 1%T <sub>2</sub> , 3%T <sub>3</sub> , 6%S <sub>4</sub> , 6%T <sub>11</sub>                                                                                 | 0.0011               |
| 20    | 370.139 nm | 66%T <sub>1</sub> , 3%T <sub>2</sub> , 23%T <sub>3</sub> , 2%S <sub>5</sub> , 1%T <sub>11</sub>                                                                                | 1.5×10 <sup>-5</sup> |
| 21    | 369.537 nm | 86%T <sub>1</sub> , 2%T <sub>2</sub> , 5%T <sub>3</sub> , 1%S <sub>5</sub>                                                                                                     | 9.7×10 <sup>-5</sup> |
| 22    | 368.947 nm | 89%T <sub>2</sub> , 5%T <sub>3</sub>                                                                                                                                           | 4.9×10 <sup>-6</sup> |
| 23    | 368.885 nm | 94%T <sub>2</sub> , 3%T <sub>3</sub>                                                                                                                                           | 3.5×10 <sup>-6</sup> |
| 24    | 368.685 nm | 2%T <sub>1</sub> , 96%T <sub>2</sub>                                                                                                                                           | 3.1×10 <sup>-5</sup> |
| 25    | 368.190 nm | 11%T <sub>1</sub> , 4%T <sub>2</sub> , 77%T <sub>3</sub> , 4%S <sub>5</sub>                                                                                                    | 1.5×10 <sup>-5</sup> |
| 26    | 367.964 nm | 13%T <sub>1</sub> , 3%T <sub>2</sub> , 78%T <sub>3</sub> , 1%S <sub>5</sub> , 1%S <sub>8</sub>                                                                                 | 1.4×10 <sup>-4</sup> |
| 27    | 366.603 nm | 12%T <sub>1</sub> , 83%T <sub>3</sub>                                                                                                                                          | 1.1×10 <sup>-4</sup> |
| 28    | 365.696 nm | 2%S <sub>22</sub> , 93%T <sub>36</sub>                                                                                                                                         | 9.8×10 <sup>-7</sup> |
| 29    | 363.785 nm | 99%T <sub>4</sub>                                                                                                                                                              | 2.3×10 <sup>-6</sup> |
| 30    | 363.777 nm | 99%T <sub>4</sub>                                                                                                                                                              | 9.9×10 <sup>-8</sup> |
| 31    | 363.759 nm | 99%T <sub>4</sub>                                                                                                                                                              | 3.0×10 <sup>-7</sup> |
| 32    | 362.463 nm | 12%T <sub>1</sub> , 1%S <sub>3</sub> , 2%T <sub>3</sub> , 22%S <sub>4</sub> , 1%T <sub>6</sub> , 58%T <sub>11</sub>                                                            | 0.0038               |
| 33    | 359.460 nm | 3%T <sub>1</sub> , 3%S <sub>5</sub> , 1%T <sub>6</sub> , 6%T <sub>7</sub> , 10%T <sub>8</sub> , 67%T <sub>11</sub>                                                             | 8.5×10 <sup>-5</sup> |
| 34    | 358.761 nm | 2%T <sub>1</sub> , 7%T <sub>3</sub> , 43%S <sub>5</sub> , 4%T <sub>7</sub> , 6%T <sub>8</sub> , 19%T <sub>11</sub> , 9%T <sub>13</sub>                                         | 0.0010               |
| 35    | 358.187 nm | 2%S <sub>1</sub> , 4%T <sub>3</sub> , 3%S <sub>4</sub> , 15%S <sub>5</sub> , 5%T <sub>7</sub> , 10%T <sub>8</sub> , 48%T <sub>11</sub> , 3%T <sub>12</sub> , 4%T <sub>13</sub> | 7.3×10 <sup>-4</sup> |
| 36    | 348.297 nm | 3%S <sub>23</sub> , 93%T <sub>35</sub>                                                                                                                                         | 7.9×10 <sup>-7</sup> |
| 37    | 344.853 nm | 60%S <sub>8</sub> , 33%T <sub>13</sub>                                                                                                                                         | 6.2×10 <sup>-6</sup> |
| 38    | 342.262 nm | 45%S <sub>2</sub> , 5%S <sub>6</sub> , 10%T <sub>7</sub> , 24%T <sub>8</sub> , 1%T <sub>12</sub> , 8%T <sub>13</sub>                                                           | 0.0067               |
| 39    | 340.670 nm | 58%T <sub>35</sub> , 15%T <sub>36</sub> , 4%T <sub>40</sub> , 15%T <sub>41</sub> , 6%T <sub>42</sub>                                                                           | 4.4×10 <sup>-6</sup> |
| 40    | 340.539 nm | 81%S <sub>9</sub> , 5%T <sub>25</sub> , 9%T <sub>26</sub>                                                                                                                      | 8.1×10 <sup>-5</sup> |
| 41    | 339.156 nm | 1%S <sub>25</sub> , 52%T <sub>35</sub> , 14%T <sub>36</sub> , 23%T <sub>41</sub> , 8%T <sub>42</sub>                                                                           | 4.2×10 <sup>-4</sup> |

|    |            |                                                                                                                                          |                      |
|----|------------|------------------------------------------------------------------------------------------------------------------------------------------|----------------------|
| 42 | 337.790 nm | 80%S <sub>10</sub> , 5%T <sub>25</sub> , 9%T <sub>26</sub>                                                                               | 2.3×10 <sup>-5</sup> |
| 43 | 334.599 nm | 31%S <sub>4</sub> , 4%T <sub>5</sub> , 22%T <sub>6</sub> , 3%T <sub>7</sub> , 4%T <sub>8</sub> , 23%T <sub>11</sub> , 6%T <sub>12</sub>  | 0.0055               |
| 44 | 330.851 nm | 45%T <sub>6</sub> , 12%S <sub>7</sub> , 1%T <sub>7</sub> , 18%T <sub>8</sub> , 10%T <sub>11</sub> , 4%T <sub>12</sub>                    | 9.0×10 <sup>-4</sup> |
| 45 | 329.913 nm | 54%T <sub>6</sub> , 2%S <sub>7</sub> , 4%T <sub>7</sub> , 19%T <sub>8</sub> , 10%T <sub>11</sub> , 3%T <sub>12</sub> , 2%T <sub>13</sub> | 1.3×10 <sup>-4</sup> |
| 46 | 329.716 nm | 1%S <sub>28</sub> , 87%T <sub>41</sub>                                                                                                   | 2.8×10 <sup>-5</sup> |
| 47 | 329.391 nm | 8%T <sub>35</sub> , 6%T <sub>36</sub> , 4%T <sub>40</sub> , 72%T <sub>41</sub> , 5%T <sub>42</sub>                                       | 1.9×10 <sup>-4</sup> |
| 48 | 327.484 nm | 2%S <sub>25</sub> , 17%T <sub>35</sub> , 12%T <sub>36</sub> , 61%T <sub>41</sub> , 5%T <sub>42</sub>                                     | 3.8×10 <sup>-4</sup> |
| 49 | 326.655 nm | 1%S <sub>2</sub> , 23%T <sub>6</sub> , 5%S <sub>7</sub> , 8%T <sub>7</sub> , 43%T <sub>8</sub> , 12%T <sub>12</sub>                      | 8.3×10 <sup>-4</sup> |
| 50 | 326.062 nm | 2%S <sub>2</sub> , 24%T <sub>6</sub> , 15%T <sub>7</sub> , 39%T <sub>8</sub> , 16%T <sub>12</sub>                                        | 4.3×10 <sup>-4</sup> |

Table S10 SOC-free states of [Ir(tpy)<sub>2</sub>]<sup>3+</sup>-I<sup>-</sup>

| State           | Wavelength | Composition                                                                                                                                                                                                                      |
|-----------------|------------|----------------------------------------------------------------------------------------------------------------------------------------------------------------------------------------------------------------------------------|
| S <sub>1</sub>  | 385.460 nm | HOMO-3→LUMO 7%, HOMO-1→LUMO 83%, HOMO-1→LUMO+4 4%, HOMO-1→LUMO+8 4%                                                                                                                                                              |
| S <sub>2</sub>  | 328.652 nm | HOMO-5→LUMO 7%, HOMO-4→LUMO 28%, HOMO-2→LUMO 47%, HOMO-2→LUMO+4 1%, HOMO-2→LUMO+8 1%, HOMO-1→LUMO+1 3%, HOMO-1→LUMO+2 6%                                                                                                         |
| S <sub>3</sub>  | 306.659 nm | HOMO-9→LUMO+1 1%, HOMO-5→HOMO 15%, HOMO-4→HOMO 55%, HOMO-3→LUMO 18%, HOMO-2→HOMO 1%, HOMO-1→LUMO 2%                                                                                                                              |
| S <sub>4</sub>  | 337.992 nm | HOMO-5→HOMO 4%, HOMO-4→HOMO 15%, HOMO-3→LUMO 66%, HOMO-3→LUMO+4 2%, HOMO-3→LUMO+8 2%, HOMO-1→LUMO 6%                                                                                                                             |
| S <sub>5</sub>  | 353.846 nm | HOMO-3→LUMO+1 1%, HOMO-3→LUMO+2 2%, HOMO-2→LUMO 14%, HOMO-1→LUMO+1 29%, HOMO-1→LUMO+2 47%, HOMO-1→LUMO+11 2%                                                                                                                     |
| S <sub>6</sub>  | 307.187 nm | HOMO-6→LUMO 2%, HOMO-5→LUMO 5%, HOMO-4→LUMO 50%, HOMO-3→LUMO+2 1%, HOMO-2→LUMO 29%, HOMO-2→LUMO+4 1%, HOMO-2→LUMO+8 1%, HOMO-1→LUMO+1 2%, HOMO-1→LUMO+2 3%                                                                       |
| S <sub>7</sub>  | 336.430 nm | HOMO-2→LUMO+1 35%, HOMO-2→LUMO+2 57%, HOMO-2→LUMO+11 1%                                                                                                                                                                          |
| S <sub>8</sub>  | 334.558 nm | HOMO-4→LUMO 1%, HOMO-3→LUMO+1 37%, HOMO-3→LUMO+2 53%, HOMO-3→LUMO+11 1%, HOMO-1→LUMO+1 2%, HOMO-1→LUMO+2 3%                                                                                                                      |
| S <sub>9</sub>  | 335.848 nm | HOMO-3→HOMO 68%, HOMO-3→LUMO+1 11%, HOMO-3→LUMO+2 5%, HOMO-3→LUMO+3 3%, HOMO-3→LUMO+5 4%, HOMO-3→LUMO+6 3%, HOMO-1→HOMO 1%                                                                                                       |
| S <sub>10</sub> | 332.771 nm | HOMO-7→HOMO 3%, HOMO-1→HOMO 73%, HOMO-1→LUMO+1 10%, HOMO-1→LUMO+2 4%, HOMO-1→LUMO+3 2%, HOMO-1→LUMO+5 3%, HOMO-1→LUMO+6 2%                                                                                                       |
| S <sub>11</sub> | 292.617 nm | HOMO-8→HOMO 13%, HOMO-7→LUMO 2%, HOMO-6→HOMO 5%, HOMO-6→LUMO+1 1%, HOMO-5→LUMO+1 2%, HOMO-5→LUMO+2 1%, HOMO-4→HOMO 2%, HOMO-2→HOMO 49%, HOMO-2→LUMO+1 9%, HOMO-2→LUMO+2 2%, HOMO-2→LUMO+3 2%, HOMO-2→LUMO+5 2%, HOMO-2→LUMO+6 2% |
| S <sub>12</sub> | 262.391 nm | HOMO-13→LUMO+1 2%, HOMO-9→LUMO+1 1%, HOMO-9→LUMO+3 1%, HOMO-8→HOMO 17%, HOMO-6→HOMO 30%, HOMO-5→HOMO 24%, HOMO-5→LUMO+1 2%, HOMO-4→HOMO 4%, HOMO-4→LUMO+1 3%, HOMO-4→LUMO+2 3%, HOMO-4→LUMO+5 1%                                 |
| S <sub>13</sub> | 260.659 nm | HOMO-8→HOMO 5%, HOMO-7→LUMO 54%, HOMO-6→LUMO+1 3%, HOMO-5→LUMO+1 1%, HOMO-5→LUMO+2 6%, HOMO-4→LUMO+1 1%, HOMO-4→LUMO+2 7%, HOMO-4→LUMO+3 2%, HOMO-2→HOMO 5%,                                                                     |

|                 |            |                                                                                                                                                                                                                                                                                         |
|-----------------|------------|-----------------------------------------------------------------------------------------------------------------------------------------------------------------------------------------------------------------------------------------------------------------------------------------|
|                 |            | HOMO-2→LUMO+1 3%                                                                                                                                                                                                                                                                        |
| S <sub>14</sub> | 258.556 nm | HOMO-12→LUMO+1 1%, HOMO-12→LUMO+2 2%, HOMO-10→LUMO+2 2%, HOMO-10→LUMO+3 2%, HOMO-10→LUMO+6 1%, HOMO-6→LUMO 45%, HOMO-5→LUMO 28%, HOMO-4→LUMO 2%, HOMO-4→LUMO+4 3%                                                                                                                       |
| S <sub>15</sub> | 261.351 nm | HOMO-8→HOMO 23%, HOMO-7→LUMO 6%, HOMO-6→HOMO 9%, HOMO-5→HOMO 5%, HOMO-5→LUMO+1 8%, HOMO-4→LUMO+1 2%, HOMO-4→LUMO+2 11%, HOMO-4→LUMO+6 2%, HOMO-2→HOMO 18%, HOMO-2→LUMO+2 2%                                                                                                             |
| S <sub>16</sub> | 254.852 nm | HOMO-19→HOMO 3%, HOMO-16→HOMO 3%, HOMO-10→HOMO 4%, HOMO-8→LUMO 3%, HOMO-7→HOMO 77%, HOMO-1→HOMO 1%, HOMO-1→LUMO+1 1%                                                                                                                                                                    |
| S <sub>17</sub> | 248.626 nm | HOMO-13→HOMO 2%, HOMO-12→LUMO 1%, HOMO-9→LUMO+5 1%, HOMO-8→HOMO 1%, HOMO-6→LUMO+1 13%, HOMO-6→LUMO+3 2%, HOMO-5→LUMO+6 2%, HOMO-4→LUMO+1 63%, HOMO-4→LUMO+2 1%                                                                                                                          |
| S <sub>18</sub> | 250.416 nm | HOMO-20→LUMO 3%, HOMO-17→LUMO 2%, HOMO-9→LUMO 7%, HOMO-8→LUMO 80%, HOMO-7→HOMO 3%                                                                                                                                                                                                       |
| S <sub>19</sub> | 240.660 nm | HOMO-15→HOMO 2%, HOMO-14→HOMO 2%, HOMO-8→LUMO+1 45%, HOMO-8→LUMO+2 20%, HOMO-6→LUMO+7 2%, HOMO-5→LUMO+5 4%, HOMO-5→LUMO+7 2%, HOMO-4→HOMO 1%, HOMO-4→LUMO+5 8%                                                                                                                          |
| S <sub>20</sub> | 239.852 nm | HOMO-15→LUMO 1%, HOMO-14→LUMO 2%, HOMO-7→LUMO+1 21%, HOMO-7→LUMO+2 44%, HOMO-6→LUMO+8 2%, HOMO-5→LUMO 1%, HOMO-5→LUMO+4 3%, HOMO-5→LUMO+8 2%, HOMO-4→LUMO 1%, HOMO-4→LUMO+4 9%                                                                                                          |
| T <sub>1</sub>  | 370.269 nm | HOMO-14→LUMO+8 1%, HOMO-10→LUMO+1 2%, HOMO-10→LUMO+2 4%, HOMO-7→LUMO 2%, HOMO-7→LUMO+2 1%, HOMO-6→LUMO 1%, HOMO-5→LUMO 20%, HOMO-5→LUMO+2 2%, HOMO-4→LUMO 41%, HOMO-4→LUMO+1 2%, HOMO-4→LUMO+2 2%, HOMO-2→LUMO 7%                                                                       |
| T <sub>2</sub>  | 370.118 nm | HOMO-9→HOMO 2%, HOMO-9→LUMO+1 2%, HOMO-9→LUMO+7 2%, HOMO-8→HOMO 8%, HOMO-8→LUMO+1 1%, HOMO-6→HOMO 1%, HOMO-6→LUMO+1 3%, HOMO-5→HOMO 13%, HOMO-5→LUMO+1 12%, HOMO-5→LUMO+2 5%, HOMO-4→HOMO 21%, HOMO-4→LUMO+1 11%, HOMO-4→LUMO+2 3%                                                      |
| T <sub>3</sub>  | 368.583 nm | HOMO-10→LUMO 3%, HOMO-10→LUMO+8 3%, HOMO-7→LUMO 16%, HOMO-7→LUMO+4 1%, HOMO-6→LUMO+1 2%, HOMO-6→LUMO+2 4%, HOMO-5→LUMO 3%, HOMO-5→LUMO+1 7%, HOMO-5→LUMO+2 13%, HOMO-4→LUMO 6%, HOMO-4→LUMO+1 7%, HOMO-4→LUMO+2 14%, HOMO-2→LUMO 1%, HOMO-2→LUMO+1 2%, HOMO-2→LUMO+2 3%, HOMO-1→LUMO 2% |
| T <sub>4</sub>  | 365.101 nm | HOMO-9→HOMO 3%, HOMO-9→LUMO+1 3%, HOMO-9→LUMO+2 1%, HOMO-9→LUMO+7 2%, HOMO-8→HOMO 10%, HOMO-8→LUMO+1 1%, HOMO-6→LUMO+1 2%, HOMO-6→LUMO+2 1%, HOMO-5→HOMO 18%, HOMO-5→LUMO+1 11%, HOMO-5→LUMO+2 4%, HOMO-4→HOMO 22%, HOMO-4→LUMO+1 5%, HOMO-4→LUMO+2 4%                                  |
| T <sub>5</sub>  | 405.826 nm | HOMO-10→LUMO 4%, HOMO-7→LUMO 7%, HOMO-7→LUMO+8 2%, HOMO-5→LUMO+2 2%, HOMO-4→LUMO+1 1%, HOMO-4→LUMO+2 3%, HOMO-1→LUMO 66%, HOMO-1→LUMO+4 3%, HOMO-1→LUMO+8 4%                                                                                                                            |
| T <sub>6</sub>  | 324.504 nm | HOMO-12→LUMO+2 2%, HOMO-12→LUMO+3 2%, HOMO-11→LUMO 4%, HOMO-7→LUMO 1%, HOMO-6→LUMO 24%, HOMO-6→LUMO+4 1%, HOMO-5→LUMO 4%, HOMO-4→LUMO 14%, HOMO-3→LUMO 2%, HOMO-2→LUMO 26%, HOMO-2→LUMO+8 1%                                                                                            |
| T <sub>7</sub>  | 323.424 nm | HOMO-13→LUMO+1 1%, HOMO-11→HOMO 2%, HOMO-8→HOMO 2%, HOMO-8→LUMO+1 1%, HOMO-7→LUMO 5%, HOMO-6→HOMO 20%, HOMO-6→LUMO 2%, HOMO-5→HOMO 5%, HOMO-4→HOMO 6%, HOMO-4→LUMO 1%, HOMO-4→LUMO+2 2%, HOMO-3→LUMO 31%, HOMO-                                                                         |

|                 |            |                                                                                                                                                                                                                                                                                                                                                                                                                   |
|-----------------|------------|-------------------------------------------------------------------------------------------------------------------------------------------------------------------------------------------------------------------------------------------------------------------------------------------------------------------------------------------------------------------------------------------------------------------|
|                 |            | 3→LUMO+8 1%, HOMO-1→LUMO 1%                                                                                                                                                                                                                                                                                                                                                                                       |
| T <sub>8</sub>  | 328.616 nm | HOMO-13→LUMO+1 1%, HOMO-11→HOMO 2%, HOMO-8→LUMO+1 1%, HOMO-7→LUMO 5%, HOMO-6→HOMO 20%, HOMO-6→LUMO+5 1%, HOMO-5→HOMO 4%, HOMO-4→HOMO 6%, HOMO-4→LUMO+1 1%, HOMO-3→LUMO 36%, HOMO-3→LUMO+4 1%, HOMO-3→LUMO+8 1%, HOMO-1→LUMO 1%                                                                                                                                                                                    |
| T <sub>9</sub>  | 406.273 nm | HOMO-7→LUMO+1 2%, HOMO-7→LUMO+2 3%, HOMO-3→LUMO 1%, HOMO-1→LUMO+1 31%, HOMO-1→LUMO+2 51%, HOMO-1→LUMO+9 1%, HOMO-1→LUMO+11 2%                                                                                                                                                                                                                                                                                     |
| T <sub>10</sub> | 306.297 nm | HOMO-17→HOMO 2%, HOMO-13→LUMO+5 2%, HOMO-13→LUMO+7 1%, HOMO-9→HOMO 9%, HOMO-9→LUMO+5 1%, HOMO-8→HOMO 49%, HOMO-8→LUMO+7 4%, HOMO-6→HOMO 2%, HOMO-5→LUMO+1 2%, HOMO-4→HOMO 2%, HOMO-4→LUMO+1 6%, HOMO-4→LUMO+2 3%                                                                                                                                                                                                  |
| T <sub>11</sub> | 352.535 nm | HOMO-11→LUMO 1%, HOMO-10→LUMO+1 1%, HOMO-10→LUMO+2 2%, HOMO-10→LUMO+3 1%, HOMO-7→LUMO+2 2%, HOMO-6→LUMO 16%, HOMO-5→LUMO 8%, HOMO-2→LUMO 52%, HOMO-2→LUMO+4 2%, HOMO-2→LUMO+8 2%                                                                                                                                                                                                                                  |
| T <sub>12</sub> | 314.968 nm | HOMO-12→LUMO 2%, HOMO-12→LUMO+4 2%, HOMO-11→LUMO+2 1%, HOMO-10→LUMO+4 2%, HOMO-7→LUMO 33%, HOMO-7→LUMO+8 1%, HOMO-6→LUMO+2 2%, HOMO-6→LUMO+3 3%, HOMO-6→LUMO+6 2%, HOMO-4→LUMO+1 2%, HOMO-4→LUMO+2 4%, HOMO-3→LUMO 19%, HOMO-2→LUMO+2 1%, HOMO-1→LUMO 13%                                                                                                                                                         |
| T <sub>13</sub> | 323.469 nm | HOMO-15→LUMO+2 2%, HOMO-14→LUMO+1 1%, HOMO-14→LUMO+2 3%, HOMO-12→LUMO 2%, HOMO-10→LUMO 13%, HOMO-10→LUMO+4 1%, HOMO-4→LUMO+2 2%, HOMO-4→LUMO+3 4%, HOMO-4→LUMO+6 2%, HOMO-2→LUMO+1 20%, HOMO-2→LUMO+2 31%, HOMO-2→LUMO+11 1%                                                                                                                                                                                      |
| T <sub>14</sub> | 284.059 nm | HOMO-15→LUMO+1 2%, HOMO-15→LUMO+3 1%, HOMO-14→LUMO+1 2%, HOMO-14→LUMO+2 1%, HOMO-13→HOMO 4%, HOMO-9→HOMO 26%, HOMO-9→LUMO+5 7%, HOMO-8→LUMO+5 10%, HOMO-8→LUMO+7 1%, HOMO-6→LUMO+3 6%, HOMO-6→LUMO+6 5%, HOMO-5→LUMO+3 7%, HOMO-5→LUMO+6 5%, HOMO-4→LUMO+1 2%, HOMO-2→HOMO 2%                                                                                                                                     |
| T <sub>15</sub> | 423.148 nm | HOMO-3→LUMO+1 38%, HOMO-3→LUMO+2 55%, HOMO-3→LUMO+11 1%                                                                                                                                                                                                                                                                                                                                                           |
| T <sub>16</sub> | 283.566 nm | HOMO-14→LUMO+3 1%, HOMO-12→LUMO 7%, HOMO-11→LUMO+3 1%, HOMO-10→LUMO 17%, HOMO-10→LUMO+4 7%, HOMO-7→LUMO 3%, HOMO-7→LUMO+4 11%, HOMO-7→LUMO+8 2%, HOMO-6→LUMO+2 3%, HOMO-6→LUMO+3 7%, HOMO-6→LUMO+6 4%, HOMO-5→LUMO+3 5%, HOMO-5→LUMO+6 3%, HOMO-3→LUMO 1%, HOMO-2→LUMO+1 3%, HOMO-2→LUMO+2 6%, HOMO-1→LUMO 5%                                                                                                     |
| T <sub>17</sub> | 278.358 nm | HOMO-15→LUMO+1 2%, HOMO-14→LUMO+1 2%, HOMO-14→LUMO+2 1%, HOMO-13→HOMO 18%, HOMO-13→LUMO+5 3%, HOMO-11→LUMO+1 3%, HOMO-11→LUMO+2 1%, HOMO-11→LUMO+3 2%, HOMO-11→LUMO+6 1%, HOMO-9→LUMO+5 1%, HOMO-8→HOMO 5%, HOMO-6→LUMO+1 10%, HOMO-6→LUMO+2 6%, HOMO-6→LUMO+3 1%, HOMO-5→LUMO+1 6%, HOMO-5→LUMO+2 2%, HOMO-5→LUMO+3 1%, HOMO-5→LUMO+5 1%, HOMO-5→LUMO+6 1%, HOMO-4→LUMO+3 5%, HOMO-4→LUMO+6 6%, HOMO-4→LUMO+9 1% |
| T <sub>18</sub> | 448.759 nm | HOMO-7→HOMO 1%, HOMO-3→HOMO 66%, HOMO-3→LUMO+1 10%, HOMO-3→LUMO+2 5%, HOMO-3→LUMO+3 4%, HOMO-3→LUMO+5 5%, HOMO-3→LUMO+6 3%, HOMO-1→HOMO 1%                                                                                                                                                                                                                                                                        |
| T <sub>19</sub> | 276.357 nm | HOMO-15→LUMO 1%, HOMO-15→LUMO+4 2%, HOMO-14→LUMO 2%, HOMO-14→LUMO+4 2%, HOMO-10→LUMO+3 13%, HOMO-10→LUMO+6                                                                                                                                                                                                                                                                                                        |

9%, HOMO-7→LUMO+1 1%, HOMO-7→LUMO+3 5%, HOMO-7→LUMO+6 4%, HOMO-6→LUMO+4 13%, HOMO-5→LUMO+4 19%, HOMO-4→LUMO 2%, HOMO-4→LUMO+4 12%, HOMO-2→LUMO 1%

T<sub>20</sub> 275.371 nm HOMO-15→HOMO 6%, HOMO-14→HOMO 6%, HOMO-9→LUMO+2 1%, HOMO-9→LUMO+3 10%, HOMO-9→LUMO+6 7%, HOMO-8→LUMO+3 5%, HOMO-8→LUMO+6 4%, HOMO-6→LUMO+5 9%, HOMO-5→LUMO+5 21%, HOMO-5→LUMO+7 1%, HOMO-4→LUMO+5 10%, HOMO-4→LUMO+7 1%, HOMO-2→HOMO 1%
